# Supplementary material for: In silico prediction of serious eye irritation or corrosion potential of chemicals
Source: Royal Society of Chemistry journal article supplement (doi:10.1039/c6ra25267b), 2017-01-01
Supplement: c6ra25267b1.xlsx [file c6ra25267b1.xlsx]

## Sheet: Table S1
Table S1. The name, CAS, SMILES strings and classification of all chemicals for EC models
No.	Name	CAS	SMILES	Class
1	2-Propynylamine	2450-71-7	NCC#C	1
2	Cyclopropylamine	765-30-0	NC1CC1	1
3	Propylene oxide	75-56-9	CC1CO1	1
4	Propylamine	107-10-8	CCCN	1
5	N-Ethylmethylamine	624-78-2	CCNC	1
6	Imidazole	288-32-4	c1c[nH]cn1	1
7	3-Pyrroline	109-96-6	C1NCC=C1	1
8	Propiolic acidd	471-25-0	OC(=O)C#C	1
9	Methacrolein	78-85-3	CC(=C)C=O	1
10	3-Aminopropionitrile	151-18-8	NCCC#N	1
11	Tetrahydro pyrrole	123-75-1	C1CCNC1	1
12	Cyclobutylamine	2516-34-9	NC1CCC1	1
13	Acrylic acid	79-10-7	OC(=O)C=C	1
14	Butylamine	109-73-9	CCCCN	1
15	tert-Butylamine	75-64-9	CC(C)(C)N	1
16	(S)-(+)-2-Aminobutane	513-49-5	CCC(C)N	1
17	Diethylamine	109-89-7	CCNCC	1
18	N,N-Dimethylethylamine	598-56-1	CCN(C)C	1
19	Isobutylamine	78-81-9	CC(C)CN	1
20	N-Methylpropylamine	627-35-0	CCCNC	1
21	Glyoxylic acid	298-12-4	OC(=O)C=O	1
22	1,2-Diaminopropane	78-90-0	CC(N)CN	1
23	1,3-Diaminopropane	109-76-2	NCCCN	1
24	N-MethylethylenediaMine	109-81-9	CNCCN	1
25	3-Chloropropyne	624-65-7	ClCC#C	1
26	Amino-2-propanol	78-96-6	CC(O)CN	1
27	2-MethoxyethylaMine	109-85-3	COCCN	1
28	2-Methylaminoethanol	109-83-1	CNCCO	1
29	3-Aminopropanol	156-87-6	NCCCO	1
30	DL-Alaninol	6168-72-5	CC(N)CO	1
31	Glycolic acid	79-14-1	OCC(=O)O	1
32	Thioacetic acid	507-09-5	CC(=O)S	1
33	Allyl chloride	107-05-1	ClCC=C	1
34	Chloroacetaldehyde	107-20-0	ClCC=O	1
35	Acetyl chloride	75-36-5	CC(=O)Cl	1
36	Azabenzene	110-86-1	c1ccncc1	1
37	2-Methylimidazole	693-98-1	Cc1ncc[nH]1	1
38	2-Methylimidazole-4-sulfonic acid	822-36-6	Cc1cnc[nH]1	1
39	1-Methylimidazole	616-47-7	Cn1ccnc1	1
40	2-Butynoic acid	590-93-2	CC#CC(=O)O	1
41	Cyanoacetic acid	372-09-8	OC(=O)CC#N	1
42	Cyclopentylamine	1003-03-8	NC1CCCC1	1
43	1-Methylpyrrolidine	120-94-5	CN1CCCC1	1
44	2-Butyne-1,4-diol	110-65-6	OCC#CCO	1
45	Cyclopropanecarboxylic acid	1759-53-1	OC(=O)C1CC1	1
46	Methyl acrylate	96-33-3	COC(=O)C=C	1
47	Crotonic acid	107-93-7	CC=CC(=O)O	1
48	Vinylacetic acid	625-38-7	OC(=O)CC=C	1
49	Methacrylic acid	79-41-4	CC(=C)C(=O)O	1
50	Morpholine	110-91-8	C1COCCN1	1
51	1-(2-Hydroxyethyl)ethyleneiMine	1072-52-2	OCCN1CC1	1
52	Amylamine	110-58-7	CCCCCN	1
53	1,2-Dimethylpropylamine	598-74-3	CC(C)C(C)N	1
54	Neopentylamine	5813-64-9	CC(C)(C)CN	1
55	2-MethylbutylaMine	96-15-1	CCC(C)CN	1
56	tert-AMylaMine	594-39-8	CCC(C)(C)N	1
57	N-EthylisopropylaMine	19961-27-4	CCNC(C)C	1
58	IsoaMylaMine	107-85-7	CC(C)CCN	1
59	3-Aminopentane	616-24-0	CCC(N)CC	1
60	N,N-DiMethylisopropylaMine	996-35-0	CC(C)N(C)C	1
61	N-Ethylpropylamine	20193-20-8	CCCNCC	1
62	N-MethylbutylaMine	110-68-9	CCCCNC	1
63	Diethylmethylamine	616-39-7	CCN(C)CC	1
64	Pyruvic acid	127-17-3	CC(=O)C(=O)O	1
65	(3R,4S)-1-Benzoyl-3-(1-methoxy-1-methylethoxy)-4-phenyl-2-azetidinone	107-92-6	CCCC(=O)O	1
66	Isobutyric acid	79-31-2	CC(C)C(=O)O	1
67	2-Aminoethyl(ethyl)amine	110-72-5	CCNCCN	1
68	2-Dimethylaminoethylamine	108-00-9	CN(C)CCN	1
69	N-Methyl-1,3-diaMinopropane	6291-84-5	CNCCCN	1
70	1,4-DiaMinobutane	110-60-1	NCCCCN	1
71	1,2-DiaMino-2-Methylpropane	811-93-8	CC(C)(N)CN	1
72	N,N'-Dimethyl-1,2-ethanediamine	110-70-3	CNCCNC	1
73	3-Methoxypropylamine	5332-73-0	COCCCN	1
74	1-AMino-2-butanol	13552-21-1	CCC(O)CN	1
75	2-Ethoxyethylamine	110-76-9	CCOCCN	1
76	2-(Ethylamino)ethanol	110-73-6	CCNCCO	1
77	4-Amino-1-butanol	13325-10-5	NCCCCO	1
78	2-AMino-1-butanol	96-20-8	CCC(N)CO	1
79	Methoxyacetic acid	625-45-6	COCC(=O)O	1
80	(R)-Lactate	10326-41-7	CC(O)C(=O)O	1
81	tert-Butyl hydroperoxide	75-91-2	CC(C)(C)OO	1
82	1,3-Diamino-2-propanol	616-29-5	NCC(O)CN	1
83	Acrylyl chloride	814-68-6	ClC(=O)C=C	1
84	3-Chloro-2-methylpropene	563-47-3	CC(=C)CCl	1
85	3-Amino-1,2-propanediol	616-30-8	NCC(O)CO	1
86	2-Amino-1,3-propanediol	534-03-2	NC(CO)CO	1
87	Mercaptoacetic acid	68-11-1	OC(=O)CS	1
88	Chloroacetone	78-95-5	CC(=O)CCl	1
89	(R)-(-)-Epichlorohydrin	51594-55-9	ClCC1CO1	1
90	Propionyl chloride	79-03-8	CCC(=O)Cl	1
91	3-Picoline	108-99-6	Cc1cccnc1	1
92	2-Picoline	109-06-8	Cc1ccccn1	1
93	Phenol	108-95-2	Oc1ccccc1	1
94	Vinylimidazole	1072-63-5	C=Cn1ccnc1	1
95	Chloroacetic acid	79-11-8	OC(=O)CCl	1
96	Chloromethyl ethyl ether	3188-13-4	CCOCCl	1
97	Difluoroacetic acid	381-73-7	OC(=O)C(F)F	1
98	Methanesulfonic acid	75-75-2	CS(=O)(=O)O	1
99	(E,E)-2,4-Hexadienal	142-83-6	CC=CC=CC=O	1
100	Maleimide	541-59-3	O=C1NC(=O)C=C1	1
101	Furfurylamine	617-89-0	NCc1occc1	1
102	Diallylamine	124-02-7	C=CCNCC=C	1
103	Triethylborane	97-94-9	CCB(CC)CC	1
104	Maleic anhydride	108-31-6	O=C1OC(=O)C=C1	1
105	2,2,2-TrifluoroethylaMine	753-90-2	NCC(F)(F)F	1
106	Ethyl cyanoformate	623-49-4	CCOC(=O)C#N	1
107	Butyl isocyanate	111-36-4	CCCCN=C=O	1
108	Hexamethyleneimine	111-49-9	C1CCCNCC1	1
109	1-Ethylpyrrolidine	7335-06-0	CCN1CCCC1	1
110	Cyclohexylamine	108-91-8	NC1CCCCC1	1
111	N-Methylpiperidine	626-67-5	CN1CCCCC1	1
112	trans-2-Pentenoic acid	13991-37-2	CCC=CC(=O)O	1
113	Cyclobutanecarboxylic acid	3721-95-7	OC(=O)C1CCC1	1
114	Ethyl acrylate	140-88-5	CCOC(=O)C=C	1
115	Pentanedial	111-30-8	O=CCCCC=O	1
116	Allylacetic acid	591-80-0	OC(=O)CCC=C	1
117	3,3-Dimethylacrylic acid	541-47-9	CC(=CC(=O)O)C	1
118	Tiglic acid	80-59-1	CC=C(C)C(=O)O	1
119	trans-3-pentenoic acid	1617-32-9	CC=CCC(=O)O	1
120	1-Methylpiperazine	109-01-3	CN1CCNCC1	1
121	2-Methylpiperazine	109-07-9	CC1CNCCN1	1
122	4-Aminopiperidine	13035-19-3	NC1CCNCC1	1
123	Homopiperazine	505-66-8	C1CNCCNC1	1
124	4-Methylmorpholine	109-02-4	CN1CCOCC1	1
125	Propyl Isothiocyanate	628-30-8	CCCN=C=S	1
126	Hexylamine	111-26-2	CCCCCCN	1
127	Diisopropylamine	108-18-9	CC(C)NC(C)C	1
128	Triethylamine	121-44-8	CCN(CC)CC	1
129	1,3-Dimethylbutylamine	108-09-8	CC(C)CC(C)N	1
130	Dipropylamine	142-84-7	CCCNCCC	1
131	Ethylbutylamine	13360-63-9	CCCCNCC	1
132	N,N-Dimethylaminobutane	927-62-8	CCCCN(C)C	1
133	3,3-DiMethyl-2-butylaMine	3850-30-4	CC(N)C(C)(C)C	1
134	2-Methyl butyric acid	116-53-0	CCC(C)C(=O)O	1
135	Valeric acid	109-52-4	CCCCC(=O)O	1
136	Pivalic acid	75-98-9	CC(C)(C)C(=O)O	1
137	Isovaleric acid	503-74-2	CC(C)CC(=O)O	1
138	N-Aminomorpholine	4319-49-7	NN1CCOCC1	1
139	1,5-Diaminopentane	462-94-2	NCCCCCN	1
140	3-Dimethylaminopropylamine	109-55-7	CN(C)CCCN	1
141	N,N'-Dimethyl-1,3-propanediamine	111-33-1	CNCCCNC	1
142	N,N,N'-TriMethylethylenediaMine	142-25-6	CNCCN(C)C	1
143	N,N,N',N'-TetraMethyldiaMinoMethane	51-80-9	CN(C)CN(C)C	1
144	1-Dimethylamino-2-propanol	108-16-7	CC(O)CN(C)C	1
145	3-Dimethylamino-1-propanol	3179-63-3	CN(C)CCCO	1
146	5-Amino-1-pentanol	2508-29-4	NCCCCCO	1
147	Diethylenetriamine	111-40-0	NCCNCCN	1
148	Thiomorpholine	123-90-0	C1CSCCN1	1
149	Ethoxyacetic acid	627-03-2	CCOCC(=O)O	1
150	2-(2-Aminoethylamino)ethanol	111-41-1	NCCNCCO	1
151	2,2'-Oxybis(ethylaMine)	2752-17-2	NCCOCCN	1
152	Methacryloyl chloride	920-46-7	CC(=C)C(=O)Cl	1
153	2-butenoyl chloride	10487-71-5	CC=CC(=O)Cl	1
154	2-(2-Aminoethoxy)ethanol	929-06-6	NCCOCCO	1
155	2,2-Dimethoxyethylamine	22483-09-6	COC(CN)OC	1
156	4-Vinylpyridine	100-43-6	C=Cc1ccncc1	1
157	2-Vinylpyridine	100-69-6	C=Cc1ccccn1	1
158	3-Vinylpyridine	1121-55-7	C=Cc1cccnc1	1
159	Ethyl fluoroacetate	459-72-3	CCOC(=O)CF	1
160	2-Mercaptopropionic acid	79-42-5	CC(S)C(=O)O	1
161	3-Mercaptopropionic acid	107-96-0	OC(=O)CCS	1
162	Ethyl 2-hydroxyethyl sulfide	110-77-0	CCSCCO	1
163	2-(Chloromethyl)-2-methyloxirane	598-09-4	CC1(CCl)CO1	1
164	Butyryl chloride	141-75-3	CCCC(=O)Cl	1
165	Isobutyryl chloride	79-30-1	CC(C)C(=O)Cl	1
166	Benzylamine	100-46-9	NCc1ccccc1	1
167	Dimethylcarbamoyl chloride	79-44-7	CN(C)C(=O)Cl	1
168	Vinylphosphonic acid	1746-03-8	OP(=O)(O)C=C	1
169	o-Cresol	95-48-7	Cc1ccccc1O	1
170	p-Cresol	106-44-5	Cc1ccc(O)cc1	1
171	m-Cresol	108-39-4	Cc1cccc(O)c1	1
172	p-Phenylenediamine	106-50-3	Nc1ccc(N)cc1	1
173	2-Picolylamine	3731-51-9	NCc1ccccn1	1
174	4-Pyridinemethaneamine	3731-53-1	NCc1ccncc1	1
175	3-(Aminomethyl)pyridine	3731-52-0	NCc1cccnc1	1
176	Methyl chloroacetate	96-34-4	COC(=O)CCl	1
177	3-Chloropropionic acid	107-94-8	OC(=O)CCCl	1
178	2-Chloropropionic acid	598-78-7	CC(Cl)C(=O)O	1
179	Methoxyacetyl chloride	38870-89-2	COCC(=O)Cl	1
180	tert-Butyl Hypochlorite	507-40-4	CC(C)(C)OCl	1
181	Chlorotrimethylsilane	75-77-4	C[Si](C)(C)Cl	1
182	Dichloroacetonitrile	3018-12-0	ClC(Cl)C#N	1
183	Ethanesulfonic acid	594-45-6	CCS(=O)(=O)O	1
184	N-Methylmaleimide	930-88-1	CN1C(=O)C=CC1=O	1
185	4-Fluoroaniline	371-40-4	Nc1ccc(F)cc1	1
186	5-Hexynoic Acid	53293-00-8	OC(=O)CCCC#C	1
187	2-Hexynoic Acid	764-33-0	CCCC#CC(=O)O	1
188	Triethylenediamine	280-57-9	C1CN2CCN1CC2	1
189	Chloroacetyl chloride	79-04-9	ClCC(=O)Cl	1
190	Hydroxylamine-O-sulfonic acid	2950-43-8	NOS(=O)(=O)O	1
191	2-Thiophenemethylamine	27757-85-3	NCc1cccs1	1
192	Heptamethyleneimine	1121-92-2	C1CCCNCCC1	1
193	1-Ethylpiperidine	766-09-6	CCN1CCCCC1	1
194	(Aminomethyl)cyclohexane	3218-02-8	NCC1CCCCC1	1
195	N-Methylcyclohexylamine	100-60-7	CNC1CCCCC1	1
196	cis-2,6-Dimethylpiperidine	766-17-6	CC1CCCC(C)N1	1
197	4-Methylcyclohexyl amine	6321-23-9	CC1CCC(N)CC1	1
198	(3-Methylcyclohexyl)amine	6850-35-7	CC1CCCC(N)C1	1
199	2-Methylcyclohexylamine	7003-32-9	CC1CCCCC1N	1
200	Trifluoroacetic acid	76-05-1	OC(=O)C(F)(F)F	1
201	Acetylenedicarboxylic acid	142-45-0	OC(=O)C#CC(=O)O	1
202	trans-3-Hexenoic acid	1577-18-0	CCC=CCC(=O)O	1
203	trans-2-Hexenoic acid	13419-69-7	CCCC=CC(=O)O	1
204	4-methyl-2-pentenoic acid	10321-71-8	CC(C)C=CC(=O)O	1
205	5-Hexenoic Acid	1577-22-6	OC(=O)CCCC=C	1
206	1,3-Diaminocyclohexane	3385-21-5	NC1CCCC(N)C1	1
207	1-Ethylpiperazine	5308-25-8	CCN1CCNCC1	1
208	1-(2-Aminoethyl)pyrrolidine	7154-73-6	NCCN1CCCC1	1
209	4-(Aminomethyl)piperidine	7144-05-0	NCC1CCNCC1	1
210	N,N'-Dimethylpiperazine	106-58-1	CN1CCN(C)CC1	1
211	1,4-Cyclohexanediamine	3114-70-3	NC1CCC(N)CC1	1
212	cis-1,2-Diaminocyclohexane	1436-59-5	NC1CCCCC1N	1
213	Dichloromethylsilane	75-54-7	C[SiH](Cl)Cl	1
214	N-Ethylmorpholine	100-74-3	CCN1CCOCC1	1
215	2-(Hydroxymethyl)piperidine	3433-37-2	OCC1CCCCN1	1
216	3-Piperidinemethanol	4606-65-9	OCC1CCCNC1	1
217	2-Aminocyclohexanol	6850-38-0	NC1CCCCC1O	1
218	Tetramethylguanidine	80-70-6	CN(C)C(=N)N(C)C	1
219	n-Heptylamine	111-68-2	CCCCCCCN	1
220	4-Heptylamine	16751-59-0	CCCC(N)CCC	1
221	N-sec-Butylpropylamine	39190-67-5	CCCNC(C)CC	1
222	Maleic acid	110-16-7	OC(=O)C=CC(=O)O	1
223	2-Tetrahydrofuroic acid	16874-33-2	OC(=O)C1CCCO1	1
224	2-Hydroxyethyl acrylate	818-61-1	OCCOC(=O)C=C	1
225	Levulinic acid	123-76-2	CC(=O)CCC(=O)O	1
226	Hexanoic acid	142-62-1	CCCCCC(=O)O	1
227	DL-3-Methylvaleric acid	105-43-1	CCC(C)CC(=O)O	1
228	2,2-Dimethylbutyric acid	595-37-9	CCC(C)(C)C(=O)O	1
229	2-methylpentanoic acid	97-61-0	CCCC(C)C(=O)O	1
230	3,3-Dimethylbutyric acid	1070-83-3	CC(C)(C)CC(=O)O	1
231	1,6-Hexanediamine	124-09-4	NCCCCCCN	1
232	2-Methyl-1,5-diaminopentane	15520-10-2	CC(CN)CCCN	1
233	N,N-Diethylethylenediamine	100-36-7	CCN(CC)CCN	1
234	N,N,N',N'-Tetramethylethylenediamine	110-18-9	CN(C)CCN(C)C	1
235	N,N'-Diethylethylenediamine	111-74-0	CCNCCNCC	1
236	2-(Butylamino)ethanol	111-75-1	CCCCNCCO	1
237	2-(tert-Butylamino)ethanol	4620-70-6	CC(C)(C)NCCO	1
238	2-(Dimethylamino)-2-methyl-1-propanol	7005-47-2	CN(C)C(C)(C)CO	1
239	N-(Trimethylsilyl)dimethylamine	2083-91-2	CN(C)[Si](C)(C)C	1
240	N-(3-Hydroxypropyl)ethylenediamine	56344-32-2	NCCNCCCO	1
241	N-(2-Hydroxypropyl)ethylenediamine	123-84-2	CC(O)CNCCN	1
242	Methyl alpha-chloroacrylate	80-63-7	COC(=O)C(=C)Cl	1
243	Allyl chloroformate	2937-50-0	ClC(=O)OCC=C	1
244	Isovaleryl chloride	108-12-3	CC(C)CC(=O)Cl	1
245	Valeryl chloride	638-29-9	CCCCC(=O)Cl	1
246	Pivaloyl chloride	3282-30-2	CC(C)(C)C(=O)Cl	1
247	Chlorodimethylvinylsilane	1719-58-0	C[Si](C)(Cl)C=C	1
248	Allyl bromide	106-95-6	BrCC=C	1
249	5-Ethyl-2-methylpyridine	104-90-5	CCc1ccc(C)nc1	1
250	2-Methylbenzylamine	89-93-0	Cc1ccccc1CN	1
251	Phenethylamine	64-04-0	NCCc1ccccc1	1
252	(R)-(+)-1-Phenylethylamine	3886-69-9	CC(N)c1ccccc1	1
253	N-Methylbenzylamine	103-67-3	CNCc1ccccc1	1
254	4-Methylbenzylamine	104-84-7	Cc1ccc(CN)cc1	1
255	3-Methylbenzylamine	100-81-2	Cc1cccc(CN)c1	1
256	2-Furanacrolein	623-30-3	O=CC=Cc1occc1	1
257	2,4-Dimethylphenol	105-67-9	Cc1ccc(O)c(C)c1	1
258	3,5-Dimethylphenol	108-68-9	Cc1cc(C)cc(O)c1	1
259	1-Hydroxy-2,3-dimethylbenzene	526-75-0	Cc1cccc(O)c1C	1
260	4-Ethylphenol	123-07-9	CCc1ccc(O)cc1	1
261	3,4-Dimethylphenol	95-65-8	Cc1ccc(O)cc1C	1
262	2,5-Dimethylphenol	95-87-4	Cc1ccc(C)c(O)c1	1
263	2-Ethylphenol	90-00-6	CCc1ccccc1O	1
264	3-Ethylphenol	620-17-7	CCc1cccc(O)c1	1
265	2-Pyridylethylamine	2706-56-1	NCCc1ccccn1	1
266	3-Pyridineethaneamine	20173-24-4	NCCc1cccnc1	1
267	4-(2-Aminoethyl)pyridine	13258-63-4	NCCc1ccncc1	1
268	Methyl Chloroglyoxylate	5781-53-3	COC(=O)C(=O)Cl	1
269	2-Chlorobutyric acid	4170-24-5	CCC(Cl)C(=O)O	1
270	Isopropyl chloroformate	108-23-6	CC(C)OC(=O)Cl	1
271	Propyl chloroformate	109-61-5	CCCOC(=O)Cl	1
272	3-chloro-n-butyric acid	1951-12-8	CC(Cl)CC(=O)O	1
273	4-Chlorobutanoic acid	627-00-9	OC(=O)CCCCl	1
274	Chloromethyltrimethylsilane	2344-80-1	C[Si](C)(C)CCl	1
275	Acetyl bromide	506-96-7	CC(=O)Br	1
276	Dimethylthiocarbamoyl chloride	16420-13-6	CN(C)C(=S)Cl	1
277	Benzoyl fluoride	455-32-3	FC(=O)c1ccccc1	1
278	2-Chloroethyl ethyl sulfide	693-07-2	CCSCCCl	1
279	2-Bromoethanol	540-51-2	OCCBr	1
280	3,4-Dichloro-1-butene	760-23-6	ClCC(Cl)C=C	1
281	trans-1,4-Dichloro-2-butene	110-57-6	ClCC=CCCl	1
282	N-Ethylmaleimide	128-53-0	CCN1C(=O)C=CC1=O	1
283	3-Fluorobenzylamine	100-82-3	NCc1cccc(F)c1	1
284	4-Fluorobenzylamine	140-75-0	NCc1ccc(F)cc1	1
285	N-(3-Aminopropyl)-imidazole	5036-48-6	NCCCn1ccnc1	1
286	2-Aminobenzenethiol	137-07-5	Nc1ccccc1S	1
287	4-Aminothiophenol	1193-02-8	Nc1ccc(S)cc1	1
288	3-Aminothiophenol	22948-02-3	Nc1cccc(S)c1	1
289	Dimethyl sulfate	77-78-1	COS(=O)(=O)OC	1
290	2-Heptynoic Acid	1483-67-6	CCCCC#CC(=O)O	1
291	3-Cyclohexenecarboxylic acid	4771-80-6	OC(=O)C1CCC=CC1	1
292	2-Mercaptophenol	1121-24-0	Oc1ccccc1S	1
293	Benzyl chloride	100-44-7	ClCc1ccccc1	1
294	Oxalyl chloride	79-37-8	ClC(=O)C(=O)Cl	1
295	1,3-Dichloroacetone	534-07-6	ClCC(=O)CCl	1
296	3-Chloropropionyl chloride	625-36-5	ClCCC(=O)Cl	1
297	Thiophene-2-ethylamine	30433-91-1	NCCc1cccs1	1
298	N-Ethylcyclohexylamine	5459-93-8	CCNC1CCCCC1	1
299	N,N-Dimethylcyclohexylamine	98-94-2	CN(C)C1CCCCC1	1
300	Octamethyleneimine	5661-71-2	C1CCCCNCCC1	1
301	Cyclooctylamine	5452-37-9	NC1CCCCCCC1	1
302	3,3,3-Trifluoropropionic acid	2516-99-6	OC(=O)CC(F)(F)F	1
303	Methyl trifluoroacetate	431-47-0	COC(=O)C(F)(F)F	1
304	hept-2-enoic acid	18999-28-5	CCCCC=CC(=O)O	1
305	2-(Aminomethyl)-1-ethylpyrrolidine	26116-12-1	CCN1CCCC1CN	1
306	1-Methyl-4-(methylamino)piperidine	73579-08-5	CNC1CCN(C)CC1	1
307	N-(2-Aminoethyl)piperidine	27578-60-5	NCCN1CCCCC1	1
308	2-Chlorophenol	95-57-8	Oc1ccccc1Cl	1
309	4-Chlorophenol	106-48-9	Oc1ccc(Cl)cc1	1
310	Ethanesulfonyl chloride	594-44-5	CCS(=O)(=O)Cl	1
311	Chloromethyl chloroformate	22128-62-7	ClCOC(=O)Cl	1
312	2-Piperidineethanol	1484-84-0	OCCC1CCCCN1	1
313	N-Aminoethylpiperazine	140-31-8	NCCN1CCNCC1	1
314	1,4,7-Triazacyclononane	4730-54-5	C1CNCCNCCN1	1
315	Diisobutylamine	110-96-3	CC(C)CNCC(C)C	1
316	2-Ethylhexylamine	104-75-6	CCCCC(CC)CN	1
317	Octylamine	111-86-4	CCCCCCCCN	1
318	tert-Octylamine	107-45-9	CC(C)(C)CC(C)(C)N	1
319	2-octylamine	693-16-3	CCCCCCC(C)N	1
320	Dibutylamine	111-92-2	CCCCNCCCC	1
321	Di-sec-butylamine	626-23-3	CCC(C)NC(C)CC	1
322	Ethyldiisopropylamine	7087-68-5	CCN(C(C)C)C(C)C	1
323	1-propanamine, N-ethyl-N-propyl-	20634-92-8	CCCN(CC)CCC	1
324	1,5-Dimethylhexylamine	543-82-8	CC(C)CCCC(C)N	1
325	1,1-Cyclopropanedicarboxylic acid	598-10-7	OC(=O)C1(CC1)C(=O)O	1
326	Hydroxypropyl acrylate	25584-83-2	OCCCOC(=O)C=C	1
327	Propionic anhydride	123-62-6	CCC(=O)OC(=O)CC	1
328	3,3-Dimethyl-2-oxobutyric acid	815-17-8	CC(C)(C)C(=O)C(=O)O	1
329	Heptanoic acid	111-14-8	CCCCCCC(=O)O	1
330	2,2-Dimethylvaleric acid	1185-39-3	CCCC(C)(C)C(=O)O	1
331	5-Methylhexanoic Acid	628-46-6	CC(C)CCCC(=O)O	1
332	4-(2-Aminoethyl)morpholine	2038-03-1	NCCN1CCOCC1	1
333	Methylene dithiocyanate	6317-18-6	N#CSCSC#N	1
334	Tetramethyl-1,3-diaminopropane	110-95-2	CN(C)CCCN(C)C	1
335	1,7-Diaminoheptane	646-19-5	NCCCCCCCN	1
336	3-Diethylaminopropylamine	104-78-9	CCN(CC)CCCN	1
337	Chlorodifluoroacetic acid	76-04-0	OC(=O)C(F)(F)Cl	1
338	2-Furoyl chloride	527-69-5	ClC(=O)c1occc1	1
339	Bis(3-aminopropyl)amine	56-18-8	NCCCNCCCN	1
340	Oxobutanedioic acid	328-42-7	OC(=O)CC(=O)C(=O)O	1
341	2-Butoxyacetic acid	2516-93-0	CCCCOCC(=O)O	1
342	m-Tolyl isocyanate	621-29-4	Cc1cccc(c1)N=C=O	1
343	2,2-Diethoxyethylamine	645-36-3	CCOC(CN)OCC	1
344	Indan-2-amine	2975-41-9	NC1Cc2ccccc2C1	1
345	N-Chlorosuccinimide	128-09-6	ClN1C(=O)CCC1=O	1
346	2-Allylphenol	1745-81-9	Oc1ccccc1CC=C	1
347	3,3-Dimethylbutyryl chloride	7065-46-5	CC(C)(C)CC(=O)Cl	1
348	Hexanoyl chloride	142-61-0	CCCCCC(=O)Cl	1
349	2,2-Dimethylbutyryl chloride	5856-77-9	CCC(C)(C)C(=O)Cl	1
350	Allylchlorodimethylsilane	4028-23-3	C[Si](C)(Cl)CC=C	1
351	3-Bromo-2-methylpropene	1458-98-6	CC(=C)CBr	1
352	Isothiocyanatobenzene	103-72-0	S=C=Nc1ccccc1	1
353	4-Methylphenethylamine	3261-62-9	Cc1ccc(CCN)cc1	1
354	N,N-Dimethylbenzylamine	103-83-3	CN(C)Cc1ccccc1	1
355	N-Ethylbenzylamine	14321-27-8	CCNCc1ccccc1	1
356	3-Phenylpropylamine	2038-57-5	NCCCc1ccccc1	1
357	Diethylcarbamyl chloride	88-10-8	CCN(CC)C(=O)Cl	1
358	Anisic aldehyde	123-11-5	COc1ccc(C=O)cc1	1
359	2,4,6-Trimethylphenol	527-60-6	Cc1cc(C)c(O)c(C)c1	1
360	4-Propylphenol	645-56-7	CCCc1ccc(O)cc1	1
361	2,3,6-Trimethylphenol	2416-94-6	Cc1ccc(C)c(O)c1C	1
362	4-Isopropylphenol	99-89-8	CC(C)c1ccc(O)cc1	1
363	2,3,5-Trimethylphenol	697-82-5	Cc1cc(C)c(C)c(O)c1	1
364	2-n-Propylphenol	644-35-9	CCCc1ccccc1O	1
365	2-Isopropylphenol	88-69-7	CC(C)c1ccccc1O	1
366	1,3-Bis(aminomethyl)benzene	1477-55-0	NCc1cccc(CN)c1	1
367	1,4-Bis(aminomethyl)benzene	539-48-0	NCc1ccc(CN)cc1	1
368	Ethyl oxalyl monochloride	4755-77-5	CCOC(=O)C(=O)Cl	1
369	Butyl chloroformate	592-34-7	CCCCOC(=O)Cl	1
370	Isobutyl chloroformate	543-27-1	CC(C)COC(=O)Cl	1
371	3-Chloropivalic Acid	13511-38-1	CC(C)(CCl)C(=O)O	1
372	Propionyl bromide	598-22-1	CCC(=O)Br	1
373	4-Methoxybenzylamine	2393-23-9	COc1ccc(CN)cc1	1
374	3-Methoxybenzylamine	5071-96-5	COc1cccc(CN)c1	1
375	2-amino-1-phenylethanol	7568-93-6	NCC(O)c1ccccc1	1
376	2-Methoxybenzylamine	6850-57-3	COc1ccccc1CN	1
377	Triallylamine	102-70-5	C=CCN(CC=C)CC=C	1
378	N-Bromoacetamide	79-15-2	CC(=O)NBr	1
379	2-Bromoacetamide	683-57-8	NC(=O)CBr	1
380	2,5-Dimethylresorcinol	488-87-9	Cc1cc(O)c(C)c(O)c1	1
381	trans-decahydronaphthalene	493-02-7	C1CCC2CCCCC2C1	1
382	Bromoacetic acid	79-08-3	OC(=O)CBr	1
383	1-Bromo-2-propanol	19686-73-8	CC(O)CBr	1
384	2-(Trifluoromethyl)acrylic acid	381-98-6	OC(=O)C(=C)C(F)(F)F	1
385	Ethyl chlorofluoroacetate	401-56-9	CCOC(=O)C(F)Cl	1
386	Benzoyl chloride	98-88-4	ClC(=O)c1ccccc1	1
387	2-Chlorobenzaldehyde	89-98-5	Clc1ccccc1C=O	1
388	4-Methylbenzyl chloride	104-82-5	Cc1ccc(CCl)cc1	1
389	2-Methylbenzyl chloride	552-45-4	Cc1ccccc1CCl	1
390	3-Methylbenzyl chloride	620-19-9	Cc1cccc(CCl)c1	1
391	4-Chlorobutyryl chloride	4635-59-0	ClCCCC(=O)Cl	1
392	O-phosphocolamine	1071-23-4	NCCOP(=O)(O)O	1
393	Dichloromethylvinylsilane	124-70-9	C[Si](Cl)(Cl)C=C	1
394	Cyclohexyl Isothiocyanate	1122-82-3	S=C=NC1CCCCC1	1
395	N-Isopropylcyclohexylamine	1195-42-2	CC(C)NC1CCCCC1	1
396	Chlorosulfonyl isocyanate	1189-71-5	ClS(=O)(=O)N=C=O	1
397	4-Chlorobenzylamine	104-86-9	NCc1ccc(Cl)cc1	1
398	3-Chlorobenzylamine	4152-90-3	NCc1cccc(Cl)c1	1
399	Ethyl trifluoroacetate	383-63-1	CCOC(=O)C(F)(F)F	1
400	4,4,4-Trifluorobutyric acid	406-93-9	OC(=O)CCC(F)(F)F	1
401	Phenylphosphinic acid	1779-48-2	OP(O)c1ccccc1	1
402	Dimethyl acetylenedicarboxylate	762-42-5	COC(=O)C#CC(=O)OC	1
403	Glycidyl methacrylate	106-91-2	CC(=C)C(=O)OCC1CO1	1
404	2-Thiopheneacetic acid	1918-77-0	OC(=O)Cc1cccs1	1
405	3-Thiopheneacetic acid	6964-21-2	OC(=O)Cc1ccsc1	1
406	trans-2-Octenoic Acid	1871-67-6	CCCCCC=CC(=O)O	1
407	1,3-Cyclohexanebis(methylamine)	2579-20-6	NCC1CCCC(CN)C1	1
408	N,N,N',N'-tetramethyl-2-butene-1,4-diamine	4559-79-9	CN(C)CC=CCN(C)C	1
409	4-Chloro-2-methylphenol	1570-64-5	Cc1cc(Cl)ccc1O	1
410	Isopropylsulfonyl Chloride	10147-37-2	CC(C)S(=O)(=O)Cl	1
411	2,3-Dichloropropionic acid	565-64-0	OC(=O)C(Cl)CCl	1
412	2-Chloroethyl chloroformate	627-11-2	ClCCOC(=O)Cl	1
413	Chloro(chloromethyl)dimethylsilane	1719-57-9	C[Si](C)(Cl)CCl	1
414	Dimethylaminoethyl acrylate	2439-35-2	CN(C)CCOC(=O)C=C	1
415	Nonylamine	112-20-9	CCCCCCCCCN	1
416	N,N-Dipropyl-1-propanamine	102-69-2	CCCN(CCC)CCC	1
417	1,1-Cyclobutanedicarboxylic acid	5445-51-2	OC(=O)C1(CCC1)C(=O)O	1
418	Octanoic acid	124-07-2	CCCCCCCC(=O)O	1
419	2-Ethylhexanoic acid	149-57-5	CCCCC(CC)C(=O)O	1
420	N-(3-Aminopropyl)morpholine	123-00-2	NCCCN1CCOCC1	1
421	N,N,N',N',1-pentamethyltrimethylenediamine	97-84-7	CC(CCN(C)C)N(C)C	1
422	N,N,N',N'-Tetramethyl-1,4-butanediamine	111-51-3	CN(C)CCCCN(C)C	1
423	1,8-Diaminooctane	373-44-4	NCCCCCCCCN	1
424	4-Chlorobenzene-1,2-diol	2138-22-9	Oc1ccc(Cl)cc1O	1
425	alpha-Chloro-p-fluorotoluene	352-11-4	Fc1ccc(CCl)cc1	1
426	alpha-Chloro-o-fluorotoluene	345-35-7	Fc1ccccc1CCl	1
427	3-Fluorobenzyl chloride	456-42-8	Fc1cccc(CCl)c1	1
428	4-Chlorothiophenol	106-54-7	Sc1ccc(Cl)cc1	1
429	3-Chlorothiophenol	2037-31-2	Sc1cccc(Cl)c1	1
430	2-Chlorothiophenol	6320-03-2	Sc1ccccc1Cl	1
431	N,N-Bis(3-aminopropyl)methylamine	105-83-9	CN(CCCN)CCCN	1
432	2-(Hexyloxy)ethanol	112-25-4	CCCCCCOCCO	1
433	Triethylenetetramine	112-24-3	NCCNCCNCCN	1
434	Tris(2-aminoethyl)amine	4097-89-6	NCCN(CCN)CCN	1
435	Cyclohexanecarboxylic acid chloride	2719-27-9	ClC(=O)C1CCCCC1	1
436	Chloral	75-87-6	ClC(Cl)(Cl)C=O	1
437	Dichloroacetyl chloride	79-36-7	ClC(Cl)C(=O)Cl	1
438	Heptanoyl chloride	2528-61-2	CCCCCCC(=O)Cl	1
439	4,6-Dichloropyrimidine	1193-21-1	Clc1cc(Cl)ncn1	1
440	Benzyl thiocyanate	3012-37-1	N#CSCc1ccccc1	1
441	Trichloroethanol	115-20-8	OCC(Cl)(Cl)Cl	1
442	Methyltrichlorosilane	75-79-6	C[Si](Cl)(Cl)Cl	1
443	Trifluoromethanesulfonic acid	1493-13-6	OS(=O)(=O)C(F)(F)F	1
444	Thiodiglycolic acid	123-93-3	OC(=O)CSCC(=O)O	1
445	4-(2-Butyl)phenol	99-71-8	CCC(C)c1ccc(O)cc1	1
446	4-tert-Butylphenol	98-54-4	CC(C)(C)c1ccc(O)cc1	1
447	2-tert-Butylphenol	88-18-6	CC(C)(C)c1ccccc1O	1
448	4-Butylphenol	1638-22-8	CCCCc1ccc(O)cc1	1
449	3-tert-Butylphenol	585-34-2	CC(C)(C)c1cccc(O)c1	1
450	Thymol	89-83-8	CC(C)c1ccc(C)cc1O	1
451	2-sec-Butylphenol	89-72-5	CCC(C)c1ccccc1O	1
452	N-Benzylethylenediamine	4152-09-4	NCCNCc1ccccc1	1
453	Methyl 2-chloroacetoacetate	4755-81-1	COC(=O)C(Cl)C(=O)C	1
454	Methyl 4-chloro-3-oxo-butanoate	32807-28-6	COC(=O)CC(=O)CCl	1
455	Chlorotriethylsilane	994-30-9	CC[Si](Cl)(CC)CC	1
456	n-Butyldimethylchlorosilane	1000-50-6	CCCC[Si](C)(C)Cl	1
457	Piperonylamine	2620-50-0	NCc1ccc2OCOc2c1	1
458	(S)-(-)-1-(4-Methoxyphenyl)ethylamine	41851-59-6	COc1ccc(cc1)C(C)N	1
459	4-Methoxyphenethylamine	55-81-2	COc1ccc(CCN)cc1	1
460	3-Methoxyphenethylamine	2039-67-0	COc1cccc(CCN)c1	1
461	2-[(dimethylamino)methyl]phenol	120-65-0	CN(C)Cc1ccccc1O	1
462	2-Methoxyphenethylamine	2045-79-6	COc1ccccc1CCN	1
463	4-(Chloromethyl)tolunitrile	874-86-2	ClCc1ccc(cc1)C#N	1
464	2-(Chloromethyl)benzonitrile	612-13-5	ClCc1ccccc1C#N	1
465	Vanillin	121-33-5	COc1cc(C=O)ccc1O	1
466	cis-1,2,3,6-Tetrahydrophthalic anhydride	935-79-5	O=C1OC(=O)C2CC=CCC12	1
467	3,4,5,6-Tetrahydrophthalic anhydride	2426-02-0	O=C1OC(=O)C2=C1CCCC2	1
468	Cumyl hydroperoxide	80-15-9	CC(C)(OO)c1ccccc1	1
469	1,8-Diazabicyclo[5.4.0]undec-7-ene	6674-22-2	C1CCN2CCCN=C2CC1	1
470	4-Vinylbenzyl chloride	1592-20-7	ClCc1ccc(C=C)cc1	1
471	Cinnamyl chloride	2687-12-9	ClCC=Cc1ccccc1	1
472	DL-2-Bromopropionic	598-72-1	CC(Br)C(=O)O	1
473	Methyl bromoacetate	96-32-2	COC(=O)CBr	1
474	3-Bromopropionic acid	590-92-1	OC(=O)CCBr	1
475	4-Fluorophenyl isothiocyanate	1544-68-9	Fc1ccc(cc1)N=C=S	1
476	3-Fluorophenyl Isothiocyanate	404-72-8	Fc1cccc(c1)N=C=S	1
477	3-Chlorophenyl isocyanate	2909-38-8	Clc1cccc(c1)N=C=O	1
478	2-Chlorophenyl isocyanate	3320-83-0	Clc1ccccc1N=C=O	1
479	Crotonic anhydride	623-68-7	CC=CC(=O)OC(=O)C=CC	1
480	Diethyl sulfate	64-67-5	CCOS(=O)(=O)OCC	1
481	Phenylacetyl chloride	103-80-0	ClC(=O)Cc1ccccc1	1
482	4-Methylbenzoyl chloride	874-60-2	Cc1ccc(cc1)C(=O)Cl	1
483	o-Toluoyl chloride	933-88-0	Cc1ccccc1C(=O)Cl	1
484	3-Methylbenzoyl chloride	1711-06-4	Cc1cccc(c1)C(=O)Cl	1
485	2,4-Dimethylbenzyl Chloride	824-55-5	Cc1ccc(CCl)c(C)c1	1
486	Succinyl chloride	543-20-4	ClC(=O)CCC(=O)Cl	1
487	5-Chlorovaleryl chloride	1575-61-7	ClCCCCC(=O)Cl	1
488	1-(3-Dimethylaminopropyl)-3-ethylcarbodiimide	1892-57-5	CCN=C=NCCCN(C)C	1
489	N,N-Diethylcyclohexylamine	91-65-6	CCN(CC)C1CCCCC1	1
490	2-nonenoic acid	3760-11-0	CCCCCCC=CC(=O)O	1
491	Triacetonediamine	36768-62-4	CC1(C)CC(N)CC(C)(C)N1	1
492	Diethyl chlorophosphite	589-57-1	CCOP(Cl)OCC	1
493	Phenyl chloroformate	1885-14-9	ClC(=O)Oc1ccccc1	1
494	4-Methoxybenzylchloride	824-94-2	COc1ccc(CCl)cc1	1
495	3-Methoxybenzyl chloride	824-98-6	COc1cccc(CCl)c1	1
496	1-Butanesulfonyl chloride	2386-60-9	CCCCS(=O)(=O)Cl	1
497	3-Chloropropyl chloroformate	628-11-5	ClCCCOC(=O)Cl	1
498	Dichlorodiethylsilane	1719-53-5	CC[Si](Cl)(Cl)CC	1
499	2-(Dimethylamino)ethyl methacrylate	2867-47-2	CN(C)CCOC(=O)C(=C)C	1
500	N,N-Dimethyloctylamine	7378-99-6	CCCCCCCCN(C)C	1
501	Diisoamylamine	544-00-3	CC(C)CCNCCC(C)C	1
502	Decylamine	2016-57-1	CCCCCCCCCCN	1
503	Diamylamine	2050-92-2	CCCCCNCCCCC	1
504	Benzenesulfonic Acid Anhydrous	98-11-3	OS(=O)(=O)c1ccccc1	1
505	Isobutyric anhydride	97-72-3	CC(C)C(=O)OC(=O)C(C)C	1
506	Butyric anhydride	106-31-0	CCCC(=O)OC(=O)CCC	1
507	Nonanoic acid	112-05-0	CCCCCCCCC(=O)O	1
508	trimethylhexamethylenediamine	25513-64-8	CC(CCN)CC(C)(C)CN	1
509	2-Fluorobenzoyl chloride	393-52-2	Fc1ccccc1C(=O)Cl	1
510	3-Fluorobenzoyl chloride	1711-07-5	Fc1cccc(c1)C(=O)Cl	1
511	4-Fluorobenzoyl chloride	403-43-0	Fc1ccc(cc1)C(=O)Cl	1
512	3-Pyridinesulfonic acid	636-73-7	OS(=O)(=O)c1cccnc1	1
513	Bis(2-dimethylaminoethyl) ether	3033-62-3	CN(C)CCOCCN(C)C	1
514	4-Chlorobenzyl chloride	104-83-6	ClCc1ccc(Cl)cc1	1
515	3-Chlorobenzyl chloride	620-20-2	ClCc1cccc(Cl)c1	1
516	N-tert-Butyldiethanolamine	2160-93-2	CC(C)(C)N(CCO)CCO	1
517	2,2'-(Butylimino)diethanol	102-79-4	CCCCN(CCO)CCO	1
518	4,4-Diethoxybutylamine	6346-09-4	CCOC(CCCN)OCC	1
519	Hexamethyldisilazane	999-97-3	C[Si](C)(C)N[Si](C)(C)C	1
520	1,1,3-Trichloroacetone	921-03-9	ClCC(=O)C(Cl)Cl	1
521	Trichlorovinylsilane	75-94-5	Cl[Si](Cl)(Cl)C=C	1
522	1,1'-Carbonyldiimidazole	530-62-1	O=C(n1ccnc1)n2ccnc2	1
523	N-(3-Aminopropyl)diethanolamine	4985-85-7	NCCCN(CCO)CCO	1
524	1-Phenylpiperazine	92-54-6	C1CN(CCN1)c2ccccc2	1
525	Octanoyl chloride	111-64-8	CCCCCCCC(=O)Cl	1
526	2-Ethylhexanoyl chloride	760-67-8	CCCCC(CC)C(=O)Cl	1
527	Ethyl dichlorophosphate	1498-51-7	CCOP(=O)(Cl)Cl	1
528	2,4-Dichlorophenol	120-83-2	Oc1ccc(Cl)cc1Cl	1
529	2,6-Dichlorophenol	87-65-0	Oc1c(Cl)cccc1Cl	1
530	2-Chloroethanesulfonyl Chloride	1622-32-8	ClCCS(=O)(=O)Cl	1
531	Phenylethyl isothiocyanate	2257-09-2	S=C=NCCc1ccccc1	1
532	N,N-DiethylbenzylaMine	772-54-3	CCN(CC)Cc1ccccc1	1
533	N-Benzylbutylamine	2403-22-7	CCCCNCc1ccccc1	1
534	Trichloroacetic acid	76-03-9	OC(=O)C(Cl)(Cl)Cl	1
535	Ethyltrichlorosilane	115-21-9	CC[Si](Cl)(Cl)Cl	1
536	Chloromethyldichloromethylsilane	1558-33-4	C[Si](Cl)(Cl)CCl	1
537	Perfluoropropionic acid	422-64-0	OC(=O)C(F)(F)C(F)(F)F	1
538	Methyl trifluoromethanesulfonate	333-27-7	COS(=O)(=O)C(F)(F)F	1
539	2-tert-Butyl-4-methylphenol	2409-55-4	Cc1ccc(O)c(c1)C(C)(C)C	1
540	4-tert-Amylphenol	80-46-6	CCC(C)(C)c1ccc(O)cc1	1
541	6-tert-Butyl-m-cresol	88-60-8	Cc1ccc(c(O)c1)C(C)(C)C	1
542	2-tert-Butyl-6-methylphenol	2219-82-1	Cc1cccc(c1O)C(C)(C)C	1
543	N,N-Diethyl-1,4-phenylenediamine	93-05-0	CCN(CC)c1ccc(N)cc1	1
544	Ethyl 2-chloroacetoacetate	609-15-4	CCOC(=O)C(Cl)C(=O)C	1
545	Ethyl 4-chloroacetoacetate	638-07-3	CCOC(=O)CC(=O)CCl	1
546	trans-4-bromo-2-butenoic acid	13991-36-1	OC(=O)C=CCBr	1
547	4-Methoxyphenyl Isothiocyanate	2284-20-0	COc1ccc(cc1)N=C=S	1
548	1-Chloroethyl isopropyl carbonate	98298-66-9	CC(C)OC(=O)OC(C)Cl	1
549	Iodoacetonitrile	624-75-9	ICC#N	1
550	2-Bromobutyric acid	80-58-0	CCC(Br)C(=O)O	1
551	2-Bromo-2-methylpropionic acid	2052-01-9	CC(C)(Br)C(=O)O	1
552	(Bromomethyl)trimethylsilane	18243-41-9	C[Si](C)(C)CBr	1
553	2,3-Dimethoxybenzylamine	4393-09-3	COc1cccc(CN)c1OC	1
554	Veratrylamine	5763-61-1	COc1ccc(CN)cc1OC	1
555	Allyl iodide	556-56-9	ICC=C	1
556	1,1,1,3,3,3-Hexafluoro-2-propanol	920-66-1	OC(C(F)(F)F)C(F)(F)F	1
557	1,6-Diisocyanatohexane	822-06-0	O=C=NCCCCCCN=C=O	1
558	Trifluoromethanesulfonyl chloride	421-83-0	FC(F)(F)S(=O)(=O)Cl	1
559	Hydrocinnamoyl chloride	645-45-4	ClC(=O)CCc1ccccc1	1
560	Mucochloric acid	87-56-9	OC(=O)C(=C(Cl)C=O)Cl	1
561	Glutaryl dichloride	2873-74-7	ClC(=O)CCCC(=O)Cl	1
562	Diethyl acetylenedicarboxylate	762-21-0	CCOC(=O)C#CC(=O)OCC	1
563	Isophorondiamine	2855-13-2	CC1(C)CC(N)CC(C)(CN)C1	1
564	Benzyl chloroformate	501-53-1	ClC(=O)OCc1ccccc1	1
565	4-(Chloromethyl)benzoic acid	1642-81-5	OC(=O)c1ccc(CCl)cc1	1
566	4-Methoxybenzoyl chloride	100-07-2	COc1ccc(cc1)C(=O)Cl	1
567	Chlorodimethylphenylsilane	768-33-2	C[Si](C)(Cl)c1ccccc1	1
568	Benzyl bromide	100-39-0	BrCc1ccccc1	1
569	n-Undecylamine	7307-55-3	CCCCCCCCCCCN	1
570	2-Bromopropionyl chloride	7148-74-5	CC(Br)C(=O)Cl	1
571	4-Nitrobenzyl chloride	100-14-1	[O-][N+](=O)c1ccc(CCl)cc1	1
572	2-Nitrobenzyl Chloride	612-23-7	[O-][N+](=O)c1ccccc1CCl	1
573	3-Nitrobenzyl chloride	619-23-8	[O-][N+](=O)c1cccc(CCl)c1	1
574	Cyclen	294-90-6	C1CNCCNCCNCCN1	1
575	N,N,N',N'-Tetramethyl-1,6-hexanediamine	111-18-2	CN(C)CCCCCCN(C)C	1
576	N,N'-Di-tert-butylethylenediamine	4062-60-6	CC(C)(C)NCCNC(C)(C)C	1
577	1,10-Diaminodecane	646-25-3	NCCCCCCCCCCN	1
578	Pentamethyldiethylenetriamine	3030-47-5	CN(C)CCN(C)CCN(C)C	1
579	Trimethoxyboroxine	102-24-9	COB1OB(OC)OB(OC)O1	1
580	toluenediisocyanate	26471-62-5	Cc1ccc(cc1N=C=O)N=C=O	1
581	4-Hydroxybenzenesulfonic acid	98-67-9	Oc1ccc(cc1)S(=O)(=O)O	1
582	Phenylmethylsulfonyl fluoride	329-98-6	FS(=O)(=O)Cc1ccccc1	1
583	1,2-Bis(3-aminopropylamino)ethane	10563-26-5	NCCCNCCNCCCN	1
584	2,4-Dichlorobenzaldehyde	874-42-0	Clc1ccc(C=O)c(Cl)c1	1
585	3,4-Dichlorobenzaldehyde	6287-38-3	Clc1ccc(C=O)cc1Cl	1
586	2,6-Dichlorobenzaldehyde	83-38-5	Clc1cccc(Cl)c1C=O	1
587	4-Chlorobenzoyl chloride	122-01-0	ClC(=O)c1ccc(Cl)cc1	1
588	2-Chlorobenzoyl chloride	609-65-4	ClC(=O)c1ccccc1Cl	1
589	3-Chlorobenzoyl chloride	618-46-2	ClC(=O)c1cccc(Cl)c1	1
590	2,5-Dichlorobenzaldehyde	6361-23-5	Clc1ccc(Cl)c(C=O)c1	1
591	3,5-Dichlorobenzaldehyde	10203-08-4	Clc1cc(Cl)cc(C=O)c1	1
592	alpha,alpha'-Dichloro-p-xylene	623-25-6	ClCc1ccc(CCl)cc1	1
593	1,3-Bis(chloromethyl)benzene	626-16-4	ClCc1cccc(CCl)c1	1
594	1,2-Bis(chloromethyl)benzene	612-12-4	ClCc1ccccc1CCl	1
595	4-(Trifluoromethyl)benzylamine	3300-51-4	NCc1ccc(cc1)C(F)(F)F	1
596	Methylenediphosphonic acid	1984-15-2	OP(=O)(O)CP(=O)(O)O	1
597	Tris(2-cyanoethyl)amine	7528-78-1	N#CCCN(CCC#N)CCC#N	1
598	Diacetoxydimethylsilane	2182-66-3	CC(=O)O[Si](C)(C)OC(=O)C	1
599	Benzenesulfonyl chloride	98-09-9	ClS(=O)(=O)c1ccccc1	1
600	1-Chloromethyl naphthalene	86-52-2	ClCc1cccc2ccccc12	1
601	3,5,5-Trimethylhexanoyl chloride	36727-29-4	CC(CC(=O)Cl)CC(C)(C)C	1
602	Nonanoyl Chloride	764-85-2	CCCCCCCCC(=O)Cl	1
603	Trichloropropylsilane	141-57-1	CCC[Si](Cl)(Cl)Cl	1
604	N-Bromosuccinimide	128-08-5	BrN1C(=O)CCC1=O	1
605	Ethyl trifluoromethanesulfonate	425-75-2	CCOS(=O)(=O)C(F)(F)F	1
606	Diethyl fluoromalonate	685-88-1	CCOC(=O)C(F)C(=O)OCC	1
607	Methyl-5-norbornene-2,3-dicarboxylic anhydride	25134-21-8	CC1C2C=CC1C3C2C(=O)OC3=O	1
608	4-Hexylphenol	2446-69-7	CCCCCCc1ccc(O)cc1	1
609	Dichlorophenylphosphine	644-97-3	ClP(Cl)c1ccccc1	1
610	Methyl 4-bromocrotonate	1117-71-1	COC(=O)C=CCBr	1
611	2-Chloro-6-fluorobenzyl chloride	55117-15-2	Fc1cccc(Cl)c1CCl	1
612	3-(Trimethoxysilyl)-1-propanamine	13822-56-5	CO[Si](CCCN)(OC)OC	1
613	2-Bromovaleric acid	584-93-0	CCCC(Br)C(=O)O	1
614	2-Bromobutyric acid methyl ester	3196-15-4	CCC(Br)C(=O)OC	1
615	2-Bromo-3-methylbutyric acid	565-74-2	CC(C)C(Br)C(=O)O	1
616	5-Bromovaleric acid	2067-33-6	OC(=O)CCCCBr	1
617	3,4-Dimethoxyphenethylamine	120-20-7	COc1ccc(CCN)cc1OC	1
618	Aminodicyclohexane	101-83-7	C1CCC(CC1)NC2CCCCC2	1
619	Trichloroacetyl chloride	76-02-8	ClC(=O)C(Cl)(Cl)Cl	1
620	2,4,6-Trimethylbenzoyl chloride	938-18-1	Cc1cc(C)c(C(=O)Cl)c(C)c1	1
621	2-Thiophenesulfonyl chloride	16629-19-9	ClS(=O)(=O)c1cccs1	1
622	2-phenoxypropionyl chloride	122-35-0	CC(Oc1ccccc1)C(=O)Cl	1
623	Benzoyl Bromide	618-32-6	BrC(=O)c1ccccc1	1
624	4-Methylbenzyl bromide	104-81-4	Cc1ccc(CBr)cc1	1
625	3-Methylbenzyl bromide	620-13-3	Cc1cccc(CBr)c1	1
626	2-Methylbenzyl bromide	89-92-9	Cc1ccccc1CBr	1
627	N,N-Dimethyldecylamine	1120-24-7	CCCCCCCCCCN(C)C	1
628	Dodecanamine	124-22-1	CCCCCCCCCCCCN	1
629	Dihexylamine	143-16-8	CCCCCCNCCCCCC	1
630	Triisobutylamine	1116-40-1	CC(C)CN(CC(C)C)CC(C)C	1
631	1,1,3,3-Tetramethyl-1,3-Divinyldisilazane	7691-02-3	C[Si](C)(N[Si](C)(C)C=C)C=C	1
632	2-bromobutyryl chloride	22118-12-3	CCC(Br)C(=O)Cl	1
633	m-Nitrobenzoyl chloride	121-90-4	[O-][N+](=O)c1cccc(c1)C(=O)Cl	1
634	4-Nitrobenzoyl chloride	122-04-3	[O-][N+](=O)c1ccc(cc1)C(=O)Cl	1
635	4-Bromobenzylamine	3959-07-7	NCc1ccc(Br)cc1	1
636	Methyl p-toluenesulfonate	80-48-8	COS(=O)(=O)c1ccc(C)cc1	1
637	Trimethylacetic anhydride	1538-75-6	CC(C)(C)C(=O)OC(=O)C(C)(C)C	1
638	Isovaleric Anhydride	1468-39-9	CC(C)CC(=O)OC(=O)CC(C)C	1
639	Valeric anhydride	2082-59-9	CCCCC(=O)OC(=O)CCCC	1
640	3-(Dibutylamino)propylamine	102-83-0	CCCCN(CCCC)CCCN	1
641	3,3'-Iminobis(N,N-dimethylpropylamine)	6711-48-4	CN(C)CCCNCCCN(C)C	1
642	(Bromomethyl)chlorodimethylsilane	16532-02-8	C[Si](C)(Cl)CBr	1
643	Plumbagin	481-42-5	CC1=CC(=O)c2c(O)cccc2C1=O	1
644	4-Hydrazinobenzenesulfonic acid	98-71-5	NNc1ccc(cc1)S(=O)(=O)O	1
645	3-trichlorosilylpropionitrile	1071-22-3	Cl[Si](Cl)(Cl)CCC#N	1
646	Diethyl chlorothiophosphate	2524-04-1	CCOP(=S)(Cl)OCC	1
647	4-Bromothiophenol	106-53-6	Sc1ccc(Br)cc1	1
648	1,4,7,10,13-Pentaazatridecane	112-57-2	NCCNCCNCCNCCN	1
649	2-Naphthoyl chloride	2243-83-6	ClC(=O)c1ccc2ccccc2c1	1
650	Tosyl chloride	98-59-9	Cc1ccc(cc1)S(=O)(=O)Cl	1
651	o-Toluenesulfonyl Chloride	133-59-5	Cc1ccccc1S(=O)(=O)Cl	1
652	Decanoyl chloride	112-13-0	CCCCCCCCCC(=O)Cl	1
653	2,4-Dichloro-3,5-dimethylphenol	133-53-9	Cc1cc(O)c(Cl)c(C)c1Cl	1
654	Dichloromethylphenylsilane	149-74-6	C[Si](Cl)(Cl)c1ccccc1	1
655	3-Aminopropyl-methyl-diethoxysilane	3179-76-8	CCO[Si](C)(CCCN)OCC	1
656	Isobutyltrichlorosilane	18169-57-8	CC(C)C[Si](Cl)(Cl)Cl	1
657	3-Chloropropylmethyldichlorosilane	7787-93-1	C[Si](Cl)(Cl)CCCCl	1
658	n-Butyltrichlorosilane	7521-80-4	CCCC[Si](Cl)(Cl)Cl	1
659	1-(2-Methoxyphenyl)piperazine	35386-24-4	COc1ccccc1N2CCNCC2	1
660	4-Heptylphenol	1987-50-4	CCCCCCCc1ccc(O)cc1	1
661	4-Chlorobenzenesulfonic acid	98-66-8	OS(=O)(=O)c1ccc(Cl)cc1	1
662	2-Ethylhexyl chloroformate	24468-13-1	CCCCC(CC)COC(=O)Cl	1
663	Octylphosphonic acid	4724-48-5	CCCCCCCCP(=O)(O)O	1
664	4-Trifluoromethylbenzyl chloride	939-99-1	FC(F)(F)c1ccc(CCl)cc1	1
665	4-Fluorobenzenesulfonyl chloride	349-88-2	Fc1ccc(cc1)S(=O)(=O)Cl	1
666	Phenylphosphonic dichloride	824-72-6	ClP(=O)(Cl)c1ccccc1	1
667	tert-Butyl bromoacetate	5292-43-3	CC(C)(C)OC(=O)CBr	1
668	Ethyl 2-bromoisobutyrate	600-00-0	CCOC(=O)C(C)(C)Br	1
669	DL-2-Bromohexanoic acid	616-05-7	CCCCC(Br)C(=O)O	1
670	N,N-Dicyclohexylmethylamine	7560-83-0	CN(C1CCCCC1)C2CCCCC2	1
671	2,4-Dichlorobenzyl chloride	94-99-5	ClCc1ccc(Cl)cc1Cl	1
672	1,2-Dichloro-4-(chloromethyl)benzene	102-47-6	ClCc1ccc(Cl)c(Cl)c1	1
673	4-Cyanobenzyl bromide	17201-43-3	BrCc1ccc(cc1)C#N	1
674	Trifluoroacetic acid 2,2,2-trifluoroethyl ester	407-38-5	FC(F)(F)COC(=O)C(F)(F)F	1
675	1,3-Dichloro-5,5-dimethylhydantoin	118-52-5	CC1(C)N(Cl)C(=O)N(Cl)C1=O	1
676	Cinnamyl bromide	4392-24-9	BrCC=Cc1ccccc1	1
677	cyclohexylmethyldichlorosilane	5578-42-7	C[Si](Cl)(Cl)C1CCCCC1	1
678	N-Octyl pyrrolidone	2687-94-7	CCCCCCCCN1CCCC1=O	1
679	2,4-Dinitrofenylhydrazin	119-26-6	NNc1ccc(cc1[N+](=O)[O-])[N+](=O)[O-]	1
680	1,4-Butanediol diacrylate	1070-70-8	C=CC(=O)OCCCCOC(=O)C=C	1
681	2-Bromoacetophenone	70-11-1	BrCC(=O)c1ccccc1	1
682	1-Aminotridecane	2869-34-3	CCCCCCCCCCCCCN	1
683	8-ethylundecan-1-amine	86089-17-0	CCCC(CC)CCCCCCCN	1
684	3-Iodopropionic Acid	141-76-4	OC(=O)CCI	1
685	2-(4-Bromophenyl)ethylamine	73918-56-6	NCCc1ccc(Br)cc1	1
686	Pentafluorothiophenol	771-62-0	Fc1c(F)c(F)c(S)c(F)c1F	1
687	1,1-Diisopropoxycyclohexane	1132-95-2	CC(C)OC1(CCCCC1)OC(C)C	1
688	1,4-Bis(3-aminopropyl)piperazine	7209-38-3	NCCCN1CCN(CCCN)CC1	1
689	3-Isopropenyl-alpha,alpha-dimethylbenzyl Isocyanate	2094-99-7	CC(=C)c1cccc(c1)C(C)(C)N=C=O	1
690	2,6,10-Trimethyl-2,6,10-triazaundecane	3855-32-1	CN(C)CCCN(C)CCCN(C)C	1
691	Bromoacetyl bromide	598-21-0	BrCC(=O)Br	1
692	Tributylphosphane	998-40-3	CCCCP(CCCC)CCCC	1
693	1-Dodecanethiol	112-55-0	CCCCCCCCCCCCS	1
694	Chlorodiphenylmethane	90-99-3	ClC(c1ccccc1)c2ccccc2	1
695	Phthaloyl dichloride	88-95-9	ClC(=O)c1ccccc1C(=O)Cl	1
696	Terephthaloyl chloride	100-20-9	ClC(=O)c1ccc(cc1)C(=O)Cl	1
697	Isophthaloyl dichloride	99-63-8	ClC(=O)c1cccc(c1)C(=O)Cl	1
698	3-nitrobenzenesulfonic acid	98-47-5	OS(=O)(=O)c1cccc(c1)[N+](=O)[O-]	1
699	2-nitrobenzenesulfonic acid	80-82-0	OS(=O)(=O)c1ccccc1[N+](=O)[O-]	1
700	4-nitrobenzenesulphonic acid	138-42-1	OS(=O)(=O)c1ccc(cc1)[N+](=O)[O-]	1
701	2-Anisidine-4-sulfonic acid	98-42-0	COc1ccc(cc1N)S(=O)(=O)O	1
702	3,3'-[butane-1,4-diylbis(oxy)]bispropanamine	7300-34-7	NCCCOCCCCOCCCN	1
703	4-Bromobenzyl chloride	589-17-3	ClCc1ccc(Br)cc1	1
704	1-Hydroxyethylidene-1,1-diphosphonic acid	2809-21-4	CC(O)(P(=O)(O)O)P(=O)(O)O	1
705	3-(2-Aminoethylamino)propyl-dimethoxymethylsilane	3069-29-2	CO[Si](C)(CCCNCCN)OC	1
706	2-Acrylamide-2-methylpropanesulfonic acid	15214-89-8	CC(C)(CS(=O)(=O)O)NC(=O)C=C	1
707	Hexafluoroacetylacetone	1522-22-1	FC(F)(F)C(=O)CC(=O)C(F)(F)F	1
708	2-(Trifluoromethyl)benzoyl chloride	312-94-7	FC(F)(F)c1ccccc1C(=O)Cl	1
709	3-(Trifluoromethyl)benzoyl chloride	2251-65-2	FC(F)(F)c1cccc(c1)C(=O)Cl	1
710	Ethyl 2-bromovalerate	615-83-8	CCCC(Br)C(=O)OCC	1
711	Ethyl 2-bromo-3-methylbutyrate	609-12-1	CCOC(=O)C(Br)C(C)C	1
712	7-Bromoheptanoic acid	30515-28-7	OC(=O)CCCCCCBr	1
713	2,4-Dichlorobenzoyl chloride	89-75-8	ClC(=O)c1ccc(Cl)cc1Cl	1
714	2,6-Dichlorobenzoyl chloride	4659-45-4	ClC(=O)c1c(Cl)cccc1Cl	1
715	3,5-Dichlorobenzoyl chloride	2905-62-6	ClC(=O)c1cc(Cl)cc(Cl)c1	1
716	3,4-Dichlorobenzoyl chloride	3024-72-4	ClC(=O)c1ccc(Cl)c(Cl)c1	1
717	Trifluoroacetic anhydride	407-25-0	FC(F)(F)C(=O)OC(=O)C(F)(F)F	1
718	Dibutyl phosphate	107-66-4	CCCCOP(=O)(O)OCCCC	1
719	phosphoric acid ethylhexylester	12645-31-7	CCCCC(CC)COP(=O)(O)O	1
720	4,4'-Diaminodicyclohexyl methane	1761-71-3	NC1CCC(CC2CCC(N)CC2)CC1	1
721	Phenyl dichlorophosphate	770-12-7	ClP(=O)(Cl)Oc1ccccc1	1
722	Dimethyl bromomalonate	868-26-8	COC(=O)C(Br)C(=O)OC	1
723	4-Chlorobenzenesulfonyl chloride	98-60-2	Clc1ccc(cc1)S(=O)(=O)Cl	1
724	(3,3,3-Trifluoropropyl)dichloromethylsilane	675-62-7	C[Si](Cl)(Cl)CCC(F)(F)F	1
725	Phenyltrichlorosilane	98-13-5	Cl[Si](Cl)(Cl)c1ccccc1	1
726	3-Chloropropyltrichlorosilane	2550-06-3	ClCCC[Si](Cl)(Cl)Cl	1
727	2-Octyl-2H-isothiazol-3-one	26530-20-1	CCCCCCCCN1SC=CC1=O	1
728	N,N-Dimethyldodecylamine	112-18-5	CCCCCCCCCCCCN(C)C	1
729	1-Tetradecylamine	2016-42-4	CCCCCCCCCCCCCCN	1
730	Diheptylamine	2470-68-0	CCCCCCCNCCCCCCC	1
731	(E)-1,4-Dibromobut-2-ene	821-06-7	BrCC=CCBr	1
732	Heptafluorobutyric acid	375-22-4	OC(=O)C(F)(F)C(F)(F)C(F)(F)F	1
733	3-Bromophenyl isothiocyanate	2131-59-1	Brc1cccc(c1)N=C=S	1
734	4-Bromophenyl Isothiocyanate	1985-12-2	Brc1ccc(cc1)N=C=S	1
735	Hexanoic Anhydride	2051-49-2	CCCCCC(=O)OC(=O)CCCCC	1
736	3,4-Dichlorobenzotrifluoride	328-84-7	FC(F)(F)c1ccc(Cl)c(Cl)c1	1
737	2,4-Dichlorobenzotrifluoride	320-60-5	FC(F)(F)c1ccc(Cl)cc1Cl	1
738	2-Bromo-4'-hydroxyacetophenone	2491-38-5	Oc1ccc(cc1)C(=O)CBr	1
739	4-Bromomethylbenzoic acid	6232-88-8	OC(=O)c1ccc(CBr)cc1	1
740	Bis(hexamethylene)triamine	143-23-7	NCCCCCCNCCCCCCN	1
741	4-Nitrobenzyl bromide	100-11-8	[O-][N+](=O)c1ccc(CBr)cc1	1
742	3-Nitrobenzyl bromide	3958-57-4	[O-][N+](=O)c1cccc(CBr)c1	1
743	2-Nitrobenzyl bromide	3958-60-9	[O-][N+](=O)c1ccccc1CBr	1
744	5-Chlorothiophene-2-sulfonyl chloride	2766-74-7	Clc1ccc(s1)S(=O)(=O)Cl	1
745	2-Methyl-5-nitrobenzenesulfonic acid	121-03-9	Cc1ccc(cc1S(=O)(=O)O)[N+](=O)[O-]	1
746	Trichloromethanesulfonyl chloride	2547-61-7	ClC(Cl)(Cl)S(=O)(=O)Cl	1
747	1,4-Butanediphosphonic acid	4671-77-6	OP(=O)(O)CCCCP(=O)(O)O	1
748	Tributylphosphine oxide	814-29-9	CCCCP(=O)(CCCC)CCCC	1
749	2-Mesitylenesulfonyl chloride	773-64-8	Cc1cc(C)c(c(C)c1)S(=O)(=O)Cl	1
750	Lauroyl chloride	112-16-3	CCCCCCCCCCCC(=O)Cl	1
751	4-Bromobenzoyl chloride	586-75-4	ClC(=O)c1ccc(Br)cc1	1
752	2-Bromobenzoyl chloride	7154-66-7	ClC(=O)c1ccccc1Br	1
753	2,2,4,4,6,6-Hexamethylcyclotrisilazane	1009-93-4	C[Si]1(C)N[Si](C)(C)N[Si](C)(C)N1	1
754	hexyltrichlorosilane	928-65-4	CCCCCC[Si](Cl)(Cl)Cl	1
755	Methyltriacetoxysilane	4253-34-3	CC(=O)O[Si](C)(OC(=O)C)OC(=O)C	1
756	Diethylene Glycol Bis(3-aminopropyl) Ether	4246-51-9	NCCCOCCOCCOCCCN	1
757	Chlorodiphenylphosphine	1079-66-9	ClP(c1ccccc1)c2ccccc2	1
758	Decyl Chloroformate	55488-51-2	CCCCCCCCCCOC(=O)Cl	1
759	2-(Bromomethyl)naphthalene	939-26-4	BrCc1ccc2ccccc2c1	1
760	3-Aminopropyltriethoxysilane	919-30-2	CCO[Si](CCCN)(OCC)OCC	1
761	3-Nitrobenzenesulfonyl chloride	121-51-7	[O-][N+](=O)c1cccc(c1)S(=O)(=O)Cl	1
762	2-Nitrobenzenesulfonyl chloride	1694-92-4	[O-][N+](=O)c1ccccc1S(=O)(=O)Cl	1
763	n-Decylphosphonic acid	6874-60-8	CCCCCCCCCCP(=O)(O)O	1
764	Isophorone diisocyanate	4098-71-9	CC1(C)CC(CC(C)(CN=C=O)C1)N=C=O	1
765	8-Bromooctanoic acid	17696-11-6	OC(=O)CCCCCCCBr	1
766	2,2',4'-Trichloroacetophenone	4252-78-2	ClCC(=O)c1ccc(Cl)cc1Cl	1
767	1-Naphthalenesulfonyl chloride	85-46-1	ClS(=O)(=O)c1cccc2ccccc12	1
768	2-Naphthalenesulfonyl chloride	93-11-8	ClS(=O)(=O)c1ccc2ccccc2c1	1
769	9-(Chloromethyl)anthracene	24463-19-2	ClCc1c2ccccc2cc3ccccc13	1
770	Triamylamine	621-77-2	CCCCCN(CCCCC)CCCCC	1
771	1-Aminopentadecane	2570-26-5	CCCCCCCCCCCCCCCN	1
772	Triisopentylamine	645-41-0	CC(C)CCN(CCC(C)C)CCC(C)C	1
773	2-Bromo-3'-methoxyacetophenone	5000-65-7	COc1cccc(c1)C(=O)CBr	1
774	2-Bromo-2-methylpropionyl bromide	20769-85-1	CC(C)(Br)C(=O)Br	1
775	2,6-Dichlorobenzal chloride	81-19-6	ClC(Cl)c1c(Cl)cccc1Cl	1
776	2-Chlorobenzotrichloride	2136-89-2	Clc1ccccc1C(Cl)(Cl)Cl	1
777	Pentafluorobenzoyl chloride	2251-50-5	Fc1c(F)c(F)c(C(=O)Cl)c(F)c1F	1
778	3,5-Dinitrobenzoyl chloride	99-33-2	[O-][N+](=O)c1cc(cc(c1)[N+](=O)[O-])C(=O)Cl	1
779	desyl chloride	447-31-4	ClC(C(=O)c1ccccc1)c2ccccc2	1
780	Diphenylcarbamyl chloride	83-01-2	ClC(=O)N(c1ccccc1)c2ccccc2	1
781	2,3-Dibromopropionic acid	600-05-5	OC(=O)C(Br)CBr	1
782	D-Camphorsulfonic acid	3144-16-9	CC1(C)C2CCC1(CS(=O)(=O)O)C(=O)C2	1
783	Pentaethylenehexamine	4067-16-7	NCCNCCNCCNCCNCCN	1
784	Heptafluorobutyryl chloride	375-16-6	FC(F)(F)C(F)(F)C(F)(F)C(=O)Cl	1
785	Chlorodiphenylmethylsilane	144-79-6	C[Si](Cl)(c1ccccc1)c2ccccc2	1
786	4-Chloro-2'-bromoacetophenone	536-38-9	Clc1ccc(cc1)C(=O)CBr	1
787	N-Acetylsulfanilyl chloride	121-60-8	CC(=O)Nc1ccc(cc1)S(=O)(=O)Cl	1
788	oxo(diphenoxy)phosphanium	4712-55-4	O=P(Oc1ccccc1)Oc2ccccc2	1
789	(Triacetoxy)ethylsilane	17689-77-9	CC[Si](OC(=O)C)(OC(=O)C)OC(=O)C	1
790	2,4-Dinitrophenylsulfenyl Chloride	528-76-7	[O-][N+](=O)c1ccc(SCl)c(c1)[N+](=O)[O-]	1
791	2-Methyl-5-nitrobenzenesulfonyl chloride	121-02-8	Cc1ccc(cc1S(=O)(=O)Cl)[N+](=O)[O-]	1
792	4-Chlorobenzhydrylchloride	134-83-8	ClC(c1ccccc1)c2ccc(Cl)cc2	1
793	Dimethyldicyane	6864-37-5	CC1CC(CC2CCC(N)C(C)C2)CCC1N	1
794	4,4'-Difluorodiphenylmethylchloride	27064-94-4	Fc1ccc(cc1)C(Cl)c2ccc(F)cc2	1
795	Diethyl Bromomalonate	685-87-0	CCOC(=O)C(Br)C(=O)OCC	1
796	Sebacoyl chloride	111-19-3	ClC(=O)CCCCCCCCC(=O)Cl	1
797	Bis(2-ethylhexyl)amine	106-20-7	CCCCC(CC)CNCC(CC)CCCC	1
798	1-Hexadecylamine	143-27-1	CCCCCCCCCCCCCCCCN	1
799	Dioctylamine	1120-48-5	CCCCCCCCNCCCCCCCC	1
800	1-(Dimethylamino)tetradecane	112-75-4	CCCCCCCCCCCCCCN(C)C	1
801	Heptanoic Anhydride	626-27-7	CCCCCCC(=O)OC(=O)CCCCCC	1
802	2-Bromo-4'-nitroacetophenone	99-81-0	[O-][N+](=O)c1ccc(cc1)C(=O)CBr	1
803	9-Bromofluorene	1940-57-4	BrC1c2ccccc2c3ccccc13	1
804	3,4-Dichlorobenzenesulfonyl Chloride	98-31-7	Clc1ccc(cc1Cl)S(=O)(=O)Cl	1
805	Myristoyl chloride	112-64-1	CCCCCCCCCCCCCC(=O)Cl	1
806	Bromodiphenylmethane	776-74-9	BrC(c1ccccc1)c2ccccc2	1
807	Octyltrichlorosilane	5283-66-9	CCCCCCCC[Si](Cl)(Cl)Cl	1
808	Alendronic acid	66376-36-1	NCCCC(O)(P(=O)(O)O)P(=O)(O)O	1
809	alpha-Bromo-2'-acetonaphthone	613-54-7	BrCC(=O)c1ccc2ccccc2c1	1
810	4-Bromobenzyl bromide	589-15-1	BrCc1ccc(Br)cc1	1
811	2-Bromobenzyl bromide	3433-80-5	BrCc1ccccc1Br	1
812	4,4'-Bis(chloromethyl)-1,1'-biphenyl	1667-10-3	ClCc1ccc(cc1)c2ccc(CCl)cc2	1
813	Diethyl 2-bromo-2-methylmalonate	29263-94-3	CCOC(=O)C(C)(Br)C(=O)OCC	1
814	Dichlorodiphenylsilane	80-10-4	Cl[Si](Cl)(c1ccccc1)c2ccccc2	1
815	Bis(2-oxo-3-oxazolidinyl)phosphinic chloride	68641-49-6	ClP(=O)(N1CCOC1=O)N2CCOC2=O	1
816	N-Methyldioctylamine	4455-26-9	CCCCCCCCN(C)CCCCCCCC	1
817	3-Bromobenzenesulfonyl chloride	2905-24-0	ClS(=O)(=O)c1cccc(Br)c1	1
818	4-Bromobenzenesulfonyl chloride	98-58-8	ClS(=O)(=O)c1ccc(Br)cc1	1
819	4-Chloro-3-nitrobenzenesulfonyl chloride	97-08-5	[O-][N+](=O)c1cc(ccc1Cl)S(=O)(=O)Cl	1
820	Mucobromic acid	488-11-9	OC(=O)C(=C(Br)C=O)Br	1
821	9-Fluorenylmethyl chloroformate	28920-43-6	ClC(=O)OCC1c2ccccc2c3ccccc13	1
822	Ethyl 2,3-dibromopropionate	3674-13-3	CCOC(=O)C(Br)CBr	1
823	alpha-bromo-2,3,4,5,6-pentafluorotoluene	1765-40-8	Fc1c(F)c(F)c(CBr)c(F)c1F	1
824	1,2-Bis(bromomethyl)benzene	91-13-4	BrCc1ccccc1CBr	1
825	1,2-dibromo(phenyl)ethane	93-52-7	BrCC(Br)c1ccccc1	1
826	alpha,alpha'-Dibromo-p-xylene	623-24-5	BrCc1ccc(CBr)cc1	1
827	1,3-Bis(bromomethyl)benzene	626-15-3	BrCc1cccc(CBr)c1	1
828	3,4-Dichlorobenzotrichloride	13014-24-9	Clc1ccc(cc1Cl)C(Cl)(Cl)Cl	1
829	Tetrapropoxysilane	682-01-9	CCCO[Si](OCCC)(OCCC)OCCC	1
830	Tris(dimethylaminomethyl)phenol	90-72-2	CN(C)Cc1cc(CN(C)C)c(O)c(CN(C)C)c1	1
831	1,3,5-Benzenetricarboxylic acid chloride	4422-95-1	ClC(=O)c1cc(cc(c1)C(=O)Cl)C(=O)Cl	1
832	Pentafluorobenzenesulfonyl Chloride	832-53-1	Fc1c(F)c(F)c(c(F)c1F)S(=O)(=O)Cl	1
833	Oleylamine	112-90-3	CCCCCCCCC=CCCCCCCCCN	1
834	Diiodomethane	75-11-6	ICI	1
835	4-Bromomethyl-7-methoxycoumarin	35231-44-8	COc1ccc2C(=CC(=O)Oc2c1)CBr	1
836	Hexadecyldimethylamine	112-69-6	CCCCCCCCCCCCCCCCN(C)C	1
837	Dansyl chloride	605-65-2	CN(C)c1cccc2c(cccc12)S(=O)(=O)Cl	1
838	2-Phosphonobutane-1,2,4-tricarboxylic acid	37971-36-1	OC(=O)CCC(CC(=O)O)(C(=O)O)P(=O)(O)O	1
839	n-Octanoic Anhydride	623-66-5	CCCCCCCC(=O)OC(=O)CCCCCCC	1
840	ethyl 2,3-dibromobutyrate	609-11-0	CCOC(=O)C(Br)C(C)Br	1
841	Palmitoyl chloride	112-67-4	CCCCCCCCCCCCCCCC(=O)Cl	1
842	2-Bromo-4'-phenylacetophenone	135-73-9	BrCC(=O)c1ccc(cc1)c2ccccc2	1
843	2-Bromo-2-phenylacetophenone	1484-50-0	BrC(C(=O)c1ccccc1)c2ccccc2	1
844	9,10-Bis(chloromethyl)anthracene	10387-13-0	ClCc1c2ccccc2c(CCl)c3ccccc13	1
845	meso-2,3-Dibromosuccinic acid	608-36-6	OC(=O)C(Br)C(Br)C(=O)O	1
846	2,4'-Dibromoacetophenone	99-73-0	BrCC(=O)c1ccc(Br)cc1	1
847	Triphenylmethyl chloride	76-83-5	ClC(c1ccccc1)(c2ccccc2)c3ccccc3	1
848	2,4,5-Trichlorobenzenesulphonyl chloride	15945-07-0	Clc1cc(Cl)c(cc1Cl)S(=O)(=O)Cl	1
849	2-Iodoxybenzoic acid	61717-82-6	OI1(=O)OC(=O)c2ccccc12	1
850	Tribromoacetaldehyde	115-17-3	BrC(Br)(Br)C=O	1
851	Butyltin trichloride	1118-46-3	CCCC[Sn](Cl)(Cl)Cl	1
852	1,3-Dibromo-5,5-dimethylhydantoin	77-48-5	CC1(C)N(Br)C(=O)N(Br)C1=O	1
853	2,2,4,4,6,6,8,8-octamethylcyclotetrasilazane	1020-84-4	C[Si]1(C)N[Si](C)(C)N[Si](C)(C)N[Si](C)(C)N1	1
854	Triphenylsilyl chloride	76-86-8	Cl[Si](c1ccccc1)(c2ccccc2)c3ccccc3	1
855	Tribromoacetic acid	75-96-7	OC(=O)C(Br)(Br)Br	1
856	Triphosgene	32315-10-9	ClC(Cl)(Cl)OC(=O)OC(Cl)(Cl)Cl	1
857	7-Acetoxy-4-bromomethylcoumarin	2747-04-8	CC(=O)Oc1ccc2C(=CC(=O)Oc2c1)CBr	1
858	N,N-Dimethyloctadecylamine	124-28-7	CCCCCCCCCCCCCCCCCCN(C)C	1
859	Perfluorobutane-1-sulphonic acid	375-73-5	OS(=O)(=O)C(F)(F)C(F)(F)C(F)(F)C(F)(F)F	1
860	Nonafluorobutanesulfonyl fluoride	375-72-4	FC(F)(F)C(F)(F)C(F)(F)C(F)(F)S(=O)(=O)F	1
861	Phenyltin trichloride	1124-19-2	Cl[Sn](Cl)(Cl)c1ccccc1	1
862	Tetra(ethylene glycol) diacrylate	17831-71-9	C=CC(=O)OCCOCCOCCOCCOC(=O)C=C	1
863	4-Iodobenzenesulfonyl chloride	98-61-3	ClS(=O)(=O)c1ccc(I)cc1	1
864	Octadecanoyl chloride	112-76-5	CCCCCCCCCCCCCCCCCC(=O)Cl	1
865	Dibutyltin dichloride	683-18-1	CCCC[Sn](Cl)(Cl)CCCC	1
866	Cetyl chloroformate	26272-90-2	CCCCCCCCCCCCCCCCOC(=O)Cl	1
867	Trichloroacetic Anhydride	4124-31-6	ClC(Cl)(Cl)C(=O)OC(=O)C(Cl)(Cl)Cl	1
868	Perfluoropropionic anhydride	356-42-3	FC(F)(F)C(F)(F)C(=O)OC(=O)C(F)(F)C(F)(F)F	1
869	alpha,alpha,alpha,alpha',alpha',alpha'-Hexachloro-p-xylene	68-36-0	ClC(Cl)(Cl)c1ccc(cc1)C(Cl)(Cl)Cl	1
870	Undecafluorohexanoic Acid	307-24-4	OC(=O)C(F)(F)C(F)(F)C(F)(F)C(F)(F)C(F)(F)F	1
871	4,4'-Biphenyldisulfonic Acid	5314-37-4	OS(=O)(=O)c1ccc(cc1)c2ccc(cc2)S(=O)(=O)O	1
872	Tetrabutyl orthosilicate	4766-57-8	CCCCO[Si](OCCCC)(OCCCC)OCCCC	1
873	Bis(2-ethylhexyl) phosphate	298-07-7	CCCCC(CC)COP(=O)(O)OCC(CC)CCCC	1
874	Triphenylmethyl bromide	596-43-0	BrC(c1ccccc1)(c2ccccc2)c3ccccc3	1
875	n-Decanoic anhydride	2082-76-0	CCCCCCCCCC(=O)OC(=O)CCCCCCCCC	1
876	Trichlorotetradecylsilane	18402-22-7	CCCCCCCCCCCCCC[Si](Cl)(Cl)Cl	1
877	Chiniofon	547-91-1	Oc1c(I)cc(c2cccnc12)S(=O)(=O)O	1
878	Tris(2-ethylhexyl)amine	1860-26-0	CCCCC(CC)CN(CC(CC)CCCC)CC(CC)CCCC	1
879	Perfluoroheptanoic acid	375-85-9	OC(=O)C(F)(F)C(F)(F)C(F)(F)C(F)(F)C(F)(F)C(F)(F)F	1
880	Heptafluorobutyric anhydride	336-59-4	FC(F)(F)C(F)(F)C(F)(F)C(=O)OC(=O)C(F)(F)C(F)(F)C(F)(F)F	1
881	Pentadecafluorooctanoic acid	335-67-1	OC(=O)C(F)(F)C(F)(F)C(F)(F)C(F)(F)C(F)(F)C(F)(F)C(F)(F)F	1
882	alpha,alpha,alpha',alpha'-Tetrabromo-o-xylene	13209-15-9	BrC(Br)c1ccccc1C(Br)Br	1
883	Perfluorononanoic acid	375-95-1	OC(=O)C(F)(F)C(F)(F)C(F)(F)C(F)(F)C(F)(F)C(F)(F)C(F)(F)C(F)(F)F	1
884	Palmitic anhydride	623-65-4	CCCCCCCCCCCCCCCC(=O)OC(=O)CCCCCCCCCCCCCCC	1
885	Perfluoro-1-octanesulfonyl fluoride	307-35-7	FC(F)(F)C(F)(F)C(F)(F)C(F)(F)C(F)(F)C(F)(F)C(F)(F)C(F)(F)S(=O)(=O)F	1
886	Nonadecafluorodecanoic Acid	335-76-2	OC(=O)C(F)(F)C(F)(F)C(F)(F)C(F)(F)C(F)(F)C(F)(F)C(F)(F)C(F)(F)C(F)(F)F	1
887	Perfluorododecanoic acid	307-55-1	OC(=O)C(F)(F)C(F)(F)C(F)(F)C(F)(F)C(F)(F)C(F)(F)C(F)(F)C(F)(F)C(F)(F)C(F)(F)C(F)(F)F	1
888	guanidine	113-00-8	NC(=N)N	0
889	Carbonic acid	463-79-6	OC(=O)O	0
890	Diethyl ether	60-29-7	CCOCC	0
891	Acetohydroxamic acid	546-88-3	CC(=O)NO	0
892	Hydroxyurea	127-07-1	NC(=O)NO	0
893	4-Methylpyrazole	7554-65-6	Cc1cn[nH]c1	0
894	4-Aminopyridine	504-24-5	Nc1ccncc1	0
895	3-Methyl-1-pentyn-3-ol	77-75-8	CCC(C)(O)C#C	0
896	D-Cycloserine	68-41-7	NC1CONC1=O	0
897	3-Pyridinemethanol	100-55-0	OCc1cccnc1	0
898	3,4-Diaminopyridine	54-96-6	Nc1ccncc1N	0
899	betazole	105-20-4	NCCc1cc[nH]n1	0
900	Histamine	51-45-6	NCCc1c[nH]cn1	0
901	Methimazole	60-56-0	CN1C=CNC1=S	0
902	2-heptylamine	123-82-0	CCCCCC(C)N	0
903	Pentyl nitrite	463-04-7	CCCCCON=O	0
904	Dichlorodifluoromethane	75-71-8	FC(F)(Cl)Cl	0
905	Tris Base	77-86-1	NC(CO)(CO)CO	0
906	2-Amino-3-mercaptopropionic acid	3374-22-9	NC(CS)C(=O)O	0
907	Nicotinamide	98-92-0	NC(=O)c1cccnc1	0
908	Nicotinic acid	59-67-6	OC(=O)c1cccnc1	0
909	Pyrazinamide	98-96-4	NC(=O)c1cnccn1	0
910	Guaiacol	90-05-1	COc1ccccc1O	0
911	4-Methoxyphenol	150-76-5	COc1ccc(O)cc1	0
912	Foscarnet	4428-95-9	OC(=O)P(=O)(O)O	0
913	2,2,2-Trifluoroethyl vinyl ether	406-90-6	FC(F)(F)COC=C	0
914	1-hydroxyl-1H-pyridine-2-thione	1121-30-8	ON1C=CC=CC1=S	0
915	Fluorocytosine	2022-85-7	NC1=NC(=O)NC=C1F	0
916	Vigabatrin	60643-86-9	NC(CCC(=O)O)C=C	0
917	Metformin	657-24-9	CN(C)C(=N)NC(=N)N	0
918	6-Aminocaproic acid	60-32-2	NCCCCCC(=O)O	0
919	trans-2-phenylcyclopropylamine hydrochloride	95-62-5	NC1CC1c2ccccc2	0
920	S(+)-Amphetamine (dextro-Amphetamine)	51-64-9	CC(N)Cc1ccccc1	0
921	Allopurinol	315-30-0	O=C1N=CNc2[nH]ncc12	0
922	2-(2-Methylaminoethyl)pyridine	5638-76-6	CNCCc1ccccn1	0
923	4-Aminobenzoic acid	150-13-0	Nc1ccc(cc1)C(=O)O	0
924	Salicylamide	65-45-2	NC(=O)c1ccccc1O	0
925	Isoniazid	54-85-3	NNC(=O)c1ccncc1	0
926	Fosfomycin	23155-02-4	CC1OC1P(=O)(O)O	0
927	Pentetrazol	54-95-5	C1CCc2nnnn2CC1	0
928	deferiprone	30652-11-0	CN1C=CC(=O)C(=C1C)O	0
929	ethosuximide	77-67-8	CCC1(C)CC(=O)NC1=O	0
930	isometheptene	503-01-5	CNC(C)CCC=C(C)C	0
931	Piracetam	7491-74-9	NC(=O)CN1CCCC1=O	0
932	Methylthiouracil	56-04-2	CC1=CC(=O)NC(=S)N1	0
933	3,5,5,-Trimethyloxazolidine-2,4-dione	127-48-0	CN1C(=O)OC(C)(C)C1=O	0
934	Dimethyl fumarate	624-49-7	COC(=O)C=CC(=O)OC	0
935	Monoethyl fumarate	2459-05-4	CCOC(=O)C=CC(=O)O	0
936	2-Propylpentanoic acid	99-66-1	CCCC(CCC)C(=O)O	0
937	ethchlorvynol	113-18-8	CCC(O)(C=CCl)C#C	0
938	D-Aminolevulinicacidmethylesterhydrochloride	33320-16-0	COC(=O)CCC(=O)CN	0
939	Gimeracil	103766-25-2	OC1=CC(=O)NC=C1Cl	0
940	Isosorbide	652-67-5	OC1COC2C(O)COC12	0
941	DL-Glutamine	6899-04-3	NC(CCC(=O)N)C(=O)O	0
942	L-Glutamic acid	56-86-0	NC(CCC(=O)O)C(=O)O	0
943	DL-Methionine	59-51-8	CSCCC(N)C(=O)O	0
944	3,3-Dimethyl-D(-)-cysteine	52-67-5	CC(C)(S)C(N)C(=O)O	0
945	Phentermine	122-09-8	CC(C)(N)Cc1ccccc1	0
946	S(+)-Methamphetamine	537-46-2	CNC(C)Cc1ccccc1	0
947	L(+)-tartaric acid	87-69-4	OC(C(O)C(=O)O)C(=O)O	0
948	D-(+)-xylose	58-86-6	OCC(O)C(O)C(O)C=O	0
949	4-Acetamidophenol	103-90-2	CC(=O)Nc1ccc(O)cc1	0
950	Phenylpropanolamine	14838-15-4	CC(N)C(O)c1ccccc1	0
951	4-(2-aminopropyl)phenol	103-86-6	CC(N)Cc1ccc(O)cc1	0
952	Amantadine	768-94-5	NC12CC3CC(CC(C3)C1)C2	0
953	6-Mercaptopurine	50-44-2	S=C1NC=Nc2nc[nH]c12	0
954	4-Aminosalicylic acid	65-49-6	Nc1ccc(C(=O)O)c(O)c1	0
955	N,alpha-dimethylcyclohexaneethylamine	101-40-6	CNC(C)CC1CCCCC1	0
956	Chlormethine	51-75-2	CN(CCCl)CCCl	0
957	Oxonic Acid	937-13-3	OC(=O)C1=NC(=O)NC(=O)N1	0
958	paramethadione	115-67-3	CCC1(C)OC(=O)N(C)C1=O	0
959	N-Methyl-N-propargylbenzylamine	555-57-7	CN(CC#C)Cc1ccccc1	0
960	1-Hydrazinophthalazine	86-54-4	NN=C1NN=Cc2ccccc12	0
961	Tolazoline	59-98-3	C(C1=NCCN1)c2ccccc2	0
962	Clomethiazole	533-45-9	Cc1ncsc1CCCl	0
963	aminorex	2207-50-3	NC1=NCC(O1)c2ccccc2	0
964	L-Nicotine	54-11-5	CN1CCCC1c2cccnc2	0
965	Tiopronin	1953-02-2	CC(S)C(=O)NCC(=O)O	0
966	N-Acetyl-cysteine	616-91-1	CC(=O)NC(CS)C(=O)O	0
967	Mephentermine	100-92-5	CNC(C)(C)Cc1ccccc1	0
968	4-Phenylbutyric acid	1821-12-1	OC(=O)CCCc1ccccc1	0
969	Methoxyflurane	76-38-0	COC(F)(F)C(Cl)Cl	0
970	Benzocaine	94-09-7	CCOC(=O)c1ccc(N)cc1	0
971	Pseudoephedrine	90-82-4	CNC(C)C(O)c1ccccc1	0
972	Chloral hydrate	302-17-0	OC(O)C(Cl)(Cl)Cl	0
973	Ethinamide	536-33-4	CCc1cc(ccn1)C(=S)N	0
974	6-Thioguanine	154-42-7	NC1=Nc2[nH]cnc2C(=S)N1	0
975	Ethinamate	126-52-3	NC(=O)OC1(CCCCC1)C#C	0
976	metaraminol	54-49-9	CC(N)C(O)c1cccc(O)c1	0
977	methyl(2,3,3-trimethyltrinorbornan-2-yl)amine	60-40-2	CNC1(C)C2CCC(C2)C1(C)C	0
978	Desflurane	57041-67-5	FC(F)OC(F)C(F)(F)F	0
979	Pyridoxine	65-23-6	Cc1ncc(CO)c(CO)c1O	0
980	Chlorzoxazone	95-25-0	Oc1oc2ccc(Cl)cc2n1	0
981	Levetiracetam	102767-28-2	CCC(N1CCCC1=O)C(=O)N	0
982	Propylthiouracil	51-52-5	CCCC1=CC(=O)NC(=S)N1	0
983	Metronidazole	443-48-1	Cc1ncc([N+](=O)[O-])n1CCO	0
984	Gabapentin hydrochloride	60142-96-3	NCC1(CC(=O)O)CCCCC1	0
985	Rasagiline	136236-51-6	C#CCNC1CCc2ccccc12	0
986	Menadione	58-27-5	CC1=CC(=O)c2ccccc2C1=O	0
987	Sulfanilamide	63-74-1	Nc1ccc(cc1)S(=O)(=O)N	0
988	menadiol	481-85-6	Cc1cc(O)c2ccccc2c1O	0
989	L(+)-Arginine	74-79-3	NC(CCCNC(=N)N)C(=O)O	0
990	Pemoline	2152-34-3	NC1=NC(=O)C(O1)c2ccccc2	0
991	phenmetrazine	134-49-6	CC1NCCOC1c2ccccc2	0
992	Betanidine	55-73-2	CNC(=NC)NCc1ccccc1	0
993	Phenylacetylurea	63-98-9	NC(=O)NC(=O)Cc1ccccc1	0
994	Propofol	2078-54-8	CC(C)c1cccc(C(C)C)c1O	0
995	phenacetin	62-44-2	CCOc1ccc(NC(=O)C)cc1	0
996	1-(2,6-Dimethylphenoxy)-2-propanamine	31828-71-4	CC(N)COc1c(C)cccc1C	0
997	methoxyphenamine	93-30-1	CNC(C)Cc1ccccc1OC	0
998	Rimantadine	13392-28-4	CC(N)C12CC3CC(CC(C3)C1)C2	0
999	Memantine	19982-08-2	CC12CC3CC(C)(C1)CC(N)(C3)C2	0
1000	D(+)-Glucose	50-99-7	OCC(O)C(O)C(O)C(O)C=O	0
1001	Theophylline	58-55-9	CN1C(=O)N(C)c2nc[nH]c2C1=O	0
1002	Rilmenidine	54187-04-1	C1CN=C(NC(C2CC2)C3CC3)O1	0
1003	Protionamide	14222-60-7	CCCc1cc(ccn1)C(=S)N	0
1004	L-Tyrosine	60-18-4	NC(Cc1ccc(O)cc1)C(=O)O	0
1005	3-(acetylamino)propanesulphonic acid	77337-76-9	CC(=O)NCCCS(=O)(=O)O	0
1006	D-Mannitol	69-65-8	OCC(O)C(O)C(O)C(O)CO	0
1007	Dacarbazine	4342-03-4	CN(C)N=Nc1[nH]cnc1C(=O)N	0
1008	MEPHENESIN	59-47-2	Cc1ccccc1OCC(O)CO	0
1009	Benzophenone	119-61-9	O=C(c1ccccc1)c2ccccc2	0
1010	Succimer	304-55-2	OC(=O)C(S)C(S)C(=O)O	0
1011	L(-)-Epinephrine	51-43-4	CNCC(O)c1ccc(O)c(O)c1	0
1012	(-)-3,4-Dihydroxynorephedrine	829-74-3	CC(N)C(O)c1ccc(O)c(O)c1	0
1013	methyprylon	125-64-4	CCC1(CC)C(=O)NCC(C)C1=O	0
1014	chlorphentermine	461-78-9	CC(C)(N)Cc1ccc(Cl)cc1	0
1015	clortermine	10389-73-8	CC(C)(N)Cc1ccccc1Cl	0
1016	diisopropyl fluorophosphate	55-91-4	CC(C)OP(=O)(F)OC(C)C	0
1017	enflurane	13838-16-9	FC(F)OC(F)(F)C(F)Cl	0
1018	Isoflurane	26675-46-7	FC(F)OC(Cl)C(F)(F)F	0
1019	Pirfenidone	53179-13-8	CC1=CN(C(=O)C=C1)c2ccccc2	0
1020	4-(Aminomethyl)benzenesulfonamide	138-39-6	NCc1ccc(cc1)S(=O)(=O)N	0
1021	Carbimazole	22232-54-8	CCOC(=O)N1C=CN(C)C1=S	0
1022	Amrinone	60719-84-8	NC1=CC(=CNC1=O)c2ccncc2	0
1023	R(-)-Selegiline	14611-51-9	CC(Cc1ccccc1)N(C)CC#C	0
1024	perfluoropropane	218599-63-4	FC(F)(F)C(F)(F)C(F)(F)F	0
1025	1-Hydroxy-2-naphthoic acid	86-48-6	OC(=O)c1ccc2ccccc2c1O	0
1026	2,3-dimercapto-1-propanesulfonic acid	74-61-3	OS(=O)(=O)CC(S)CS	0
1027	Phensuximide	86-34-0	CN1C(=O)CC(C1=O)c2ccccc2	0
1028	2,5-dihydroxybenzenesulphonic acid	88-46-0	Oc1ccc(O)c(c1)S(=O)(=O)O	0
1029	Isosorbide 5-mononitrate	16051-77-7	OC1COC2C(COC12)O[N+](=O)[O-]	0
1030	amiphenazole	490-55-1	Nc1nc(N)c(s1)c2ccccc2	0
1031	phendimetrazine	634-03-7	CC1C(OCCN1C)c2ccccc2	0
1032	tocainide	41708-72-9	CC(N)C(=O)Nc1c(C)cccc1C	0
1033	Butyl 4-aminobenzoate	94-25-7	CCCCOC(=O)c1ccc(N)cc1	0
1034	Temozolomide	85622-93-1	CN1N=Nc2c(ncn2C1=O)C(=O)N	0
1035	Aminohippuric Acid	61-78-9	Nc1ccc(cc1)C(=O)NCC(=O)O	0
1036	3-Propylxanthine	41078-02-8	CCCN1C(=O)NC(=O)c2[nH]cnc12	0
1037	9-Aminoacridine	90-45-9	Nc1c2ccccc2nc3ccccc13	0
1038	N-methyl-D-glucamine	6284-40-8	CNCC(O)C(O)C(O)C(O)CO	0
1039	Metyrosine	672-87-7	CC(N)(Cc1ccc(O)cc1)C(=O)O	0
1040	Levodopa	59-92-7	NC(Cc1ccc(O)c(O)c1)C(=O)O	0
1041	2-bromo-2-chloro-1,1,1-trifluoroethane	151-67-7	FC(F)(F)C(Cl)Br	0
1042	Furacilin	59-87-0	NC(=O)NN=Cc1oc(cc1)[N+](=O)[O-]	0
1043	Guaifenesin	93-14-1	COc1ccccc1OCC(O)CO	0
1044	1-Methylbarbital	50-11-3	CCC1(CC)C(=O)NC(=O)N(C)C1=O	0
1045	tacrine	321-64-2	Nc1c2CCCCc2nc3ccccc13	0
1046	guanethidine	55-65-2	NC(=N)NCCN1CCCCCCC1	0
1047	diethylcarbamazine	90-89-1	CCN(CC)C(=O)N1CCN(C)CC1	0
1048	cevimeline hydrochloride	107233-08-9	CC1OC2(CS1)CN3CCC2CC3	0
1049	Sevoflurane	28523-86-6	FCOC(C(F)(F)F)C(F)(F)F	0
1050	Tegafur	17902-23-7	FC1=CN(C2CCCO2)C(=O)NC1=O	0
1051	4-Benzyloxyphenol	103-16-2	Oc1ccc(OCc2ccccc2)cc1	0
1052	4-(1-(2,3-dimethylphenyl)ethyl)-1H-imidazole	113775-47-6	CC(c1c[nH]cn1)c2cccc(C)c2C	0
1053	Thiabendazole	148-79-8	c1ccc2[nH]c(nc2c1)c3cscn3	0
1054	Methsuximide	77-41-8	CN1C(=O)CC(C)(C1=O)c2ccccc2	0
1055	ethotoin	86-35-1	CCN1C(=O)NC(C1=O)c2ccccc2	0
1056	2,4,6-tris(1-aziridinyl)-1,3,5-Triazine	51-18-3	C1CN1c2nc(nc(n2)N3CC3)N4CC4	0
1057	Levamisole	14769-73-4	C1CN2CC(N=C2S1)c3ccccc3	0
1058	(2R)-2-[(2-{[(2R)-1-hydroxybutan-2-yl]amino}ethyl)amino]butan-1-ol	74-55-5	CCC(CO)NCCNC(CC)CO	0
1059	Phenformin	114-86-3	NC(=N)NC(=N)NCCc1ccccc1	0
1060	diethylpropion	90-84-6	CCN(CC)C(C)C(=O)c1ccccc1	0
1061	Diphenylcyclopropenone	886-38-4	O=C1C(=C1c2ccccc2)c3ccccc3	0
1062	Ibuprofen	15687-27-1	CC(C)Cc1ccc(cc1)C(C)C(=O)O	0
1063	pyrante	15686-83-6	CN1CCCN=C1C=Cc2cccs2	0
1064	Miglitol	72432-03-2	OCCN1CC(O)C(O)C(O)C1CO	0
1065	Ciclopirox	29342-05-0	CC1=CC(=O)N(O)C(=C1)C2CCCCC2	0
1066	talipexole	101626-70-4	Nc1nc2CCN(CC=C)CCc2s1	0
1067	mucic acid	526-99-8	OC(C(O)C(O)C(=O)O)C(O)C(=O)O	0
1068	Altretamine	645-05-6	CN(C)c1nc(nc(n1)N(C)C)N(C)C	0
1069	Nicorandil	65141-46-0	[O-][N+](=O)OCCNC(=O)c1cccnc1	0
1070	Milrinone	78415-72-2	CC1=C(C=C(C#N)C(=O)N1)c2ccncc2	0
1071	methoxamine	390-28-3	COc1ccc(OC)c(c1)C(O)C(C)N	0
1072	Isoproterenol	7683-59-2	CC(C)NCC(O)c1ccc(O)c(O)c1	0
1073	Orciprenaline	586-06-1	CC(C)NCC(O)c1cc(O)cc(O)c1	0
1074	Varenicline	249296-44-4	C1NCC2CC1c3cc4nccnc4cc23	0
1075	(S)-Pramipexole	104632-26-0	CCCNC1CCc2nc(N)sc2C1	0
1076	Zonisamide	68291-97-4	NS(=O)(=O)Cc1noc2ccccc12	0
1077	4-Biphenylacetic acid	5728-52-9	OC(=O)Cc1ccc(cc1)c2ccccc2	0
1078	butabarbital	125-40-6	CCC(C)C1(CC)C(=O)NC(=O)NC1=O	0
1079	phenazopyridine	94-78-0	Nc1ccc(N=Nc2ccccc2)c(N)n1	0
1080	Baclofen	1134-47-0	NCC(CC(=O)O)c1ccc(Cl)cc1	0
1081	niridazole	61-57-4	[O-][N+](=O)c1cnc(s1)N2CCNC2=O	0
1082	Amifostine	20537-88-6	NCCCNCCSP(=O)(O)O	0
1083	phenaglycodol	79-93-6	CC(C)(O)C(C)(O)c1ccc(Cl)cc1	0
1084	8-Methoxypsoralen	298-81-7	COc1c2OC(=O)C=Cc2cc3ccoc13	0
1085	glutethimide	77-21-4	CCC1(CCC(=O)NC1=O)c2ccccc2	0
1086	Captopril	62571-86-2	CC(CS)C(=O)N1CCCC1C(=O)O	0
1087	prolintane	493-92-5	CCCC(Cc1ccccc1)N2CCCC2	0
1088	Meprobamate	57-53-4	CCCC(C)(COC(=O)N)COC(=O)N	0
1089	mephenytoin	50-12-4	CCC1(NC(=O)N(C)C1=O)c2ccccc2	0
1090	Primidone	125-33-7	CCC1(C(=O)NCNC1=O)c2ccccc2	0
1091	monoctanoin	502-54-5	CCCCCCCC(=O)OCC(O)CO	0
1092	(+)-pantothenic acid	79-83-4	CC(C)(CO)C(O)C(=O)NCCC(=O)O	0
1093	Butibufen	55837-18-8	CCC(C(=O)O)c1ccc(CC(C)C)cc1	0
1094	ibuproxam	53648-05-8	CC(C)Cc1ccc(cc1)C(C)C(=O)NO	0
1095	procarbazine	671-16-9	CNNCc1ccc(cc1)C(=O)NC(C)C	0
1096	3-(1-dimethylamino-2-methyl-pentan-3-yl)phenol	175591-23-8	CCC(C(C)CN(C)C)c1cccc(O)c1	0
1097	Phenindione	83-12-5	O=C1C(C(=O)c2ccccc12)c3ccccc3	0
1098	Bufexamac	2438-72-4	CCCCOc1ccc(CC(=O)NO)cc1	0
1099	Stavudine	3056-17-5	CC1=CN(C2OC(CO)C=C2)C(=O)NC1=O	0
1100	vinbarbital	125-42-8	CCC=C(C)C1(CC)C(=O)NC(=O)NC1=O	0
1101	talbutal	115-44-6	CCC(C)C1(CC=C)C(=O)NC(=O)NC1=O	0
1102	Butalbital	77-26-9	CC(C)CC1(CC=C)C(=O)NC(=O)NC1=O	0
1103	Furazolidone	67-45-8	[O-][N+](=O)c1oc(C=NN2CCOC2=O)cc1	0
1104	Prenalterol	57526-81-5	CC(C)NCC(O)COc1ccc(O)cc1	0
1105	(2R,3R,4S,5R,6R)-2,3,4,5,6,7-hexahydroxyheptanoic acid	23351-51-1	OCC(O)C(O)C(O)C(O)C(O)C(=O)O	0
1106	1,8,9-Trihydroxyanthracene	1143-38-0	Oc1cccc2Cc3cccc(O)c3C(=O)c12	0
1107	S-(-)-Carbidopa	28860-95-9	CC(Cc1ccc(O)c(O)c1)(NN)C(=O)O	0
1108	Nimorazole	6506-37-2	[O-][N+](=O)c1cncn1CCN2CCOCC2	0
1109	Pentobarbitone	76-74-4	CCCC(C)C1(CC)C(=O)NC(=O)NC1=O	0
1110	Amobarbital	57-43-2	CCC1(CCC(C)C)C(=O)NC(=O)NC1=O	0
1111	Metyrapone	54-36-4	CC(C)(C(=O)c1cccnc1)c2cccnc2	0
1112	Alclofenac	22131-79-9	OC(=O)Cc1ccc(OCC=C)c(Cl)c1	0
1113	Trinitroglycerin	55-63-0	[O-][N+](=O)OCC(CO[N+](=O)[O-])O[N+](=O)[O-]	0
1114	5,7-Dichloro-8-hydroxyquinaldine	72-80-0	Cc1ccc2c(Cl)cc(Cl)c(O)c2n1	0
1115	5-Aza-2'-deoxycytidine	2353-33-5	NC1=NC(=O)N(C=N1)C2CC(O)C(CO)O2	0
1116	9-amino-7-methoxy-1,2,3,4-tetrahydroacridine	5778-80-3	COc1ccc2nc3CCCCc3c(N)c2c1	0
1117	benurestat	38274-54-3	ONC(=O)CNC(=O)c1ccc(Cl)cc1	0
1118	Picric acid	88-89-1	Oc1c(cc(cc1[N+](=O)[O-])[N+](=O)[O-])[N+](=O)[O-]	0
1119	Lamivudine	134678-17-4	NC1=NC(=O)N(C=C1)C2CSC(CO)O2	0
1120	triclofos	306-52-5	OP(=O)(O)OCC(Cl)(Cl)Cl	0
1121	N-amidino-3,5-diamino-6-chloropyrazine-2-carboxamide	2609-46-3	NC(=N)NC(=O)c1nc(Cl)c(N)nc1N	0
1122	Propyphenazone	479-92-5	CC(C)C1=C(C)N(C)N(C1=O)c2ccccc2	0
1123	diazoxide	364-98-7	CC1=Nc2ccc(Cl)cc2S(=O)(=O)N1	0
1124	1-(2,6-dichlorobenzyl-ideneamino)-guanidine	5051-62-7	NC(=N)NN=Cc1c(Cl)cccc1Cl	0
1125	Isocarboxazide	59-63-2	Cc1onc(c1)C(=O)NNCc2ccccc2	0
1126	Fenfluramine	458-24-2	CCNC(C)Cc1cccc(c1)C(F)(F)F	0
1127	Nalidixic acid	389-08-2	CCN1C=C(C(=O)O)C(=O)c2ccc(C)nc12	0
1128	Phenobarbital	50-06-6	CCC1(C(=O)NC(=O)NC1=O)c2ccccc2	0
1129	mebutamate	64-55-1	CCC(C)C(C)(COC(=O)N)COC(=O)N	0
1130	Melatonine	73-31-4	COc1ccc2[nH]cc(CCNC(=O)C)c2c1	0
1131	mofebutazone	2210-63-1	CCCCC1C(=O)NN(C1=O)c2ccccc2	0
1132	Aminoglutethimide	125-84-8	CCC1(CCC(=O)NC1=O)c2ccc(N)cc2	0
1133	Sulbactam	68373-14-8	CC1(C)C(N2C(CC2=O)S1(=O)=O)C(=O)O	0
1134	Hopantenic	18679-90-8	CC(C)(CO)C(O)C(=O)NCCCC(=O)O	0
1135	dexmethylphenidate	40431-64-9	COC(=O)C(C1CCCCN1)c2ccccc2	0
1136	Meptazinol	54340-58-8	CCC1(CCCCN(C)C1)c2cccc(O)c2	0
1137	Lomustine	13010-47-4	ClCCN(N=O)C(=O)NC1CCCCC1	0
1138	Riluzole	1744-22-5	Nc1nc2ccc(OC(F)(F)F)cc2s1	0
1139	stiripentol	49763-96-4	CC(C)(C)C(O)C=Cc1ccc2OCOc2c1	0
1140	artemisic acid	80286-58-4	CC1CCC(C2C=C(C)CCC12)C(=C)C(=O)O	0
1141	procainamide	51-06-9	CCN(CC)CCNC(=O)c1ccc(N)cc1	0
1142	Isosorbide dinitrate	87-33-2	[O-][N+](=O)OC1COC2C(COC12)O[N+](=O)[O-]	0
1143	Sorbinil	68367-52-2	Fc1ccc2OCCC3(NC(=O)NC3=O)c2c1	0
1144	Dideoxyinosine	69655-05-6	OCC1CCC(O1)n2cnc3C(=O)NC=Nc23	0
1145	Carbamazepine	298-46-4	NC(=O)N1c2ccccc2C=Cc3ccccc13	0
1146	Zileuton	111406-87-2	CC(N(O)C(=O)N)c1cc2ccccc2s1	0
1147	thioacetazone	104-06-3	CC(=O)Nc1ccc(C=NNC(=S)N)cc1	0
1148	Procaine	59-46-1	CCN(CC)CCOC(=O)c1ccc(N)cc1	0
1149	viloxazine	46817-91-8	CCOc1ccccc1OCC2CNCCO2	0
1150	ketamine	6740-88-1	CNC1(CCCCC1=O)c2ccccc2Cl	0
1151	Nitrofurantoin	67-20-9	[O-][N+](=O)c1oc(C=NN2CC(=O)NC2=O)cc1	0
1152	Rufinamide	106308-44-5	NC(=O)c1cn(Cc2c(F)cccc2F)nn1	0
1153	Felbamate	25451-15-4	NC(=O)OCC(COC(=O)N)c1ccccc1	0
1154	7-(B-hydroxypropyl)theophylline	603-00-9	CC(O)Cn1cnc2N(C)C(=O)N(C)C(=O)c12	0
1155	secobarbital	76-73-3	CCCC(C)C1(CC=C)C(=O)NC(=O)NC1=O	0
1156	nomifensine	24526-64-5	CN1CC(c2ccccc2)c3cccc(N)c3C1	0
1157	manoplax	76568-02-0	CN1C=C(C(=O)c2ccc(F)cc12)S(=O)C	0
1158	methyldopate	6014-30-8	CCOC(=O)C(C)(N)Cc1ccc(O)c(O)c1	0
1159	isoetarine	530-08-5	CCC(NC(C)C)C(O)c1ccc(O)c(O)c1	0
1160	Salbutamol	34391-04-3	CC(C)(C)NCC(O)c1ccc(O)c(CO)c1	0
1161	benzphetamine	156-08-1	CC(Cc1ccccc1)N(C)Cc2ccccc2	0
1162	bupropion	34911-55-2	CC(NC(C)(C)C)C(=O)c1cccc(Cl)c1	0
1163	fluindione	957-56-2	Fc1ccc(cc1)C2C(=O)c3ccccc3C2=O	0
1164	Pirbuterol	38677-81-5	CC(C)(C)NCC(O)c1ccc(O)c(CO)n1	0
1165	Methocarbamol	532-03-6	COc1ccccc1OCC(O)COC(=O)N	0
1166	Moxonidine	75438-57-2	COc1nc(C)nc(Cl)c1N=C2NCCN2	0
1167	2'-Deoxy-L-thymidine	3424-98-4	CC1=CN(C2CC(O)C(CO)O2)C(=O)NC1=O	0
1168	Thiopental CIII	76-75-5	CCCC(C)C1(CC)C(=O)NC(=NC1=O)S	0
1169	Clofibrate	637-07-0	CCOC(=O)C(C)(C)Oc1ccc(Cl)cc1	0
1170	Cytarabine	147-94-4	NC1=NC(=O)N(C=C1)C2OC(CO)C(O)C2O	0
1171	agomelatine	138112-76-2	COc1ccc2cccc(CCNC(=O)C)c2c1	0
1172	frovatriptan	158747-02-5	CNC1CCc2[nH]c3ccc(cc3c2C1)C(=O)N	0
1173	Ribavirin	36791-04-5	NC(=O)c1ncn(n1)C2OC(CO)C(O)C2O	0
1174	5-Azacytidine	320-67-2	NC1=NC(=O)N(C=N1)C2OC(CO)C(O)C2O	0
1175	Etomidate	33125-97-2	CCOC(=O)c1cncn1C(C)c2ccccc2	0
1176	xylometazoline	526-36-3	Cc1cc(cc(C)c1CC2=NCCN2)C(C)(C)C	0
1177	clodronate	10596-23-3	OP(=O)(O)C(Cl)(Cl)P(=O)(O)O	0
1178	Dezocine	53648-55-8	CC12CCCCCC(Cc3ccc(O)cc13)C2N	0
1179	chlorphenesin carbamate	886-74-8	NC(=O)OCC(O)COc1ccc(Cl)cc1	0
1180	Guanfacine	29110-47-2	NC(=N)NC(=O)Cc1c(Cl)cccc1Cl	0
1181	Floxuridine	50-91-9	OCC1OC(CC1O)N2C=C(F)C(=O)NC2=O	0
1182	Doxifluridine	3094-09-5	CC1OC(C(O)C1O)N2C=C(F)C(=O)NC2=O	0
1183	methylphenobarbital	115-38-8	CCC1(C(=O)NC(=O)N(C)C1=O)c2ccccc2	0
1184	Loxoprofen	68767-14-6	CC(C(=O)O)c1ccc(CC2CCCC2=O)cc1	0
1185	Busulfan	55-98-1	CS(=O)(=O)OCCCCOS(=O)(=O)C	0
1186	N-(2,6-dimethylphenyl)-1-methylpiperidine-2-carboxamide	96-88-8	CN1CCCCC1C(=O)Nc2c(C)cccc2C	0
1187	milnacipran	92623-85-3	CCN(CC)C(=O)C1(CC1CN)c2ccccc2	0
1188	Emtricitabine	143491-57-0	NC1=NC(=O)N(C=C1F)C2CSC(CO)O2	0
1189	Tinidazole	19387-91-8	CCS(=O)(=O)CCn1c(C)ncc1[N+](=O)[O-]	0
1190	ketobemidone	469-79-4	CCC(=O)C1(CCN(C)CC1)c2cccc(O)c2	0
1191	Meperidine	57-42-1	CCOC(=O)C1(CCN(C)CC1)c2ccccc2	0
1192	enoximone	77671-31-9	CSc1ccc(cc1)C(=O)C2=C(C)NC(=O)N2	0
1193	4,4'-Diaminodiphenylsulfone	80-08-0	Nc1ccc(cc1)S(=O)(=O)c2ccc(N)cc2	0
1194	Pyrimethamine	58-14-0	CCc1nc(N)nc(N)c1c2ccc(Cl)cc2	0
1195	2-Phenyl-4-quinolinecarboxylic acid	132-60-5	OC(=O)c1cc(nc2ccccc12)c3ccccc3	0
1196	8-(Benzoyloxy)quinoline	86-75-9	O=C(Oc1cccc2cccnc12)c3ccccc3	0
1197	Sulfapyridine	144-83-2	Nc1ccc(cc1)S(=O)(=O)Nc2ccccn2	0
1198	Alprenolol	13655-52-2	CC(C)NCC(O)COc1ccccc1CC=C	0
1199	Diflunisal	22494-42-4	OC(=O)c1cc(ccc1O)c2ccc(F)cc2F	0
1200	Olprinone	106730-54-5	CC1=C(C=C(C#N)C(=O)N1)c2ccc3nccn3c2	0
1201	Lacosamide	175481-36-4	COCC(NC(=O)C)C(=O)NCc1ccccc1	0
1202	heptabarb	509-86-4	CCC1(C(=O)NC(=O)NC1=O)C2=CCCCCC2	0
1203	Rivastigmine	123441-03-2	CCN(C)C(=O)Oc1cccc(c1)C(C)N(C)C	0
1204	Pirprofen	31793-07-4	CC(C(=O)O)c1ccc(N2CC=CC2)c(Cl)c1	0
1205	uramustine	66-75-1	ClCCN(CCCl)C1=CNC(=O)NC1=O	0
1206	2-(4-Methoxyphenyl)-1H-indene-1,3(2H)-dione	117-37-3	COc1ccc(cc1)C2C(=O)c3ccccc3C2=O	0
1207	Oxcarbazepine	28721-07-5	NC(=O)N1c2ccccc2CC(=O)c3ccccc13	0
1208	Cimetidine	51481-61-9	CNC(=NC#N)NCCSCc1nc[nH]c1C	0
1209	2-Amino-9-[4-hydroxy-3-(hydroxymethyl)butyl]-3,9-dihydropurin-6-one	39809-25-1	NC1=NC(=O)c2ncn(CCC(CO)CO)c2N1	0
1210	2,4,7-Triamino-6-phenylpteridine	396-01-0	Nc1nc(N)c2nc(c(N)nc2n1)c3ccccc3	0
1211	Crilvastatin	120551-59-9	CC1CC(CC(C)(C)C1)OC(=O)C2CCC(=O)N2	0
1212	3-Methyl-7-phenyl-6-oxa-3-azabicyclo[6.4.0]dodeca-8,10,12-triene	13669-70-0	CN1CCOC(c2ccccc2)c3ccccc3C1	0
1213	Tizanidine	51322-75-9	Clc1ccc2nsnc2c1NC3=NCCN3	0
1214	proguanil	500-92-5	CC(C)NC(=N)NC(=N)Nc1ccc(Cl)cc1	0
1215	Iodothiouracil	5984-97-4	Oc1nc(S)ncc1I	0
1216	Diprophylline	479-18-5	CN1C(=O)N(C)c2ncn(CC(O)CO)c2C1=O	0
1217	Fenbufen	36330-85-5	OC(=O)CCC(=O)c1ccc(cc1)c2ccccc2	0
1218	midodrine	42794-76-3	COc1ccc(OC)c(c1)C(O)CNC(=O)CN	0
1219	eslicarbazepine	104746-04-5	NC(=O)N1c2ccccc2CC(O)c3ccccc13	0
1220	thiamylal	77-27-0	CCCC(C)C1(CC=C)C(=O)NC(=S)NC1=O	0
1221	Bucricaine	316-15-4	CCCCNc1c2CCCCc2nc3ccccc13	0
1222	alrestatin	51411-04-2	OC(=O)CN1C(=O)c2cccc3cccc(C1=O)c23	0
1223	Pranoprofen	52549-17-4	CC(C(=O)O)c1ccc2Oc3ncccc3Cc2c1	0
1224	Sulfathiazole	72-14-0	Nc1ccc(cc1)S(=O)(=O)Nc2nccs2	0
1225	phenyltoloxamine	92-12-6	CN(C)CCOc1ccccc1Cc2ccccc2	0
1226	Diphenhydramine	58-73-1	CN(C)CCOC(c1ccccc1)c2ccccc2	0
1227	Tripelennamine	91-81-6	CN(C)CCN(Cc1ccccc1)c2ccccn2	0
1228	cloforex	14261-75-7	CCOC(=O)NC(C)(C)Cc1ccc(Cl)cc1	0
1229	Anagrelide	68475-42-3	Clc1ccc2N=C3NC(=O)CN3Cc2c1Cl	0
1230	Tolmetin	26171-23-3	Cc1ccc(cc1)C(=O)c2ccc(CC(=O)O)n2C	0
1231	2-(1-iodoethyl)-1,3-dioxolan-4-ylmethanol	5634-39-9	CC(I)C1OCC(CO)O1	0
1232	Sasapyrine	552-94-3	OC(=O)c1ccccc1OC(=O)c2ccccc2O	0
1233	Thalidomide	50-35-1	O=C1CCC(N2C(=O)c3ccccc3C2=O)C(=O)N1	0
1234	Ethoxzolamide	452-35-7	CCOc1ccc2nc(sc2c1)S(=O)(=O)N	0
1235	Lenalidomide	191732-72-6	Nc1cccc2C(=O)N(Cc12)C3CCC(=O)NC3=O	0
1236	Ramelteon	196597-26-9	CCC(=O)NCCC1CCc2ccc3OCCc3c12	0
1237	1-Isopropylamino-3-(naphthalen-1-yloxy)-propan-2-ol	525-66-6	CC(C)NCC(O)COc1cccc2ccccc12	0
1238	N-Benzyl-2-nitro-1H-imidazole-1-acetamide	22994-85-0	[O-][N+](=O)c1nccn1CC(=O)NCc2ccccc2	0
1239	Dolasteron	40828-46-4	CC(C(=O)O)c1ccc(cc1)C(=O)c2cccs2	0
1240	Tiaprofenic acid	33005-95-7	CC(C(=O)O)c1ccc(s1)C(=O)c2ccccc2	0
1241	Carisoprodol	78-44-4	CCCC(C)(COC(=O)N)COC(=O)NC(C)C	0
1242	fenspiride	5053-06-5	O=C1NCC2(CCN(CCc3ccccc3)CC2)O1	0
1243	Isophosphamide	3778-73-2	ClCCNP1(=O)OCCCN1CCCl	0
1244	ethoheptazine	77-15-6	CCOC(=O)C1(CCCN(C)CC1)c2ccccc2	0
1245	alphaprodine	77-20-3	CCC(=O)OC1(CCN(C)CC1C)c2ccccc2	0
1246	Hexylcainc	532-77-4	CC(CNC1CCCCC1)OC(=O)c2ccccc2	0
1247	phenindamine	82-88-2	CN1CCC2=C(C1)C(c3ccccc3)c4ccccc24	0
1248	Methapyrilene	91-80-5	CN(C)CCN(Cc1cccs1)c2ccccn2	0
1249	N-(3-Chloro-ortho-tolyl) anthranilic acid	13710-19-5	Cc1c(Cl)cccc1Nc2ccccc2C(=O)O	0
1250	Cinoxacin	28657-80-9	CCN1N=C(C(=O)O)C(=O)c2cc3OCOc3cc12	0
1251	Methohexital	151-83-7	CCC#CC(C)C1(CC=C)C(=O)NC(=O)N(C)C1=O	0
1252	Cibenzoline	53267-01-9	C1CN=C(N1)C2CC2(c3ccccc3)c4ccccc4	0
1253	Gemcitabine	95058-81-4	NC1=NC(=O)N(C=C1)C2OC(CO)C(O)C2(F)F	0
1254	Tramadol	27203-92-5	COc1cccc(c1)C2(O)CCCCC2CN(C)C	0
1255	O-Desmethylvenlafaxine	93413-62-8	CN(C)CC(c1ccc(O)cc1)C2(O)CCCCC2	0
1256	protriptyline	438-60-8	CNCCCC1c2ccccc2C=Cc3ccccc13	0
1257	nortriptyline	72-69-5	CNCCC=C1c2ccccc2CCc3ccccc13	0
1258	Ticlopidine	55142-85-3	Clc1ccccc1CN2CCc3sccc3C2	0
1259	Sulfamerazine	127-79-7	Cc1ccnc(NS(=O)(=O)c2ccc(N)cc2)n1	0
1260	Vorinostat	149647-78-9	ONC(=O)CCCCCCC(=O)Nc1ccccc1	0
1261	Tetracaine	94-24-6	CCCCNc1ccc(cc1)C(=O)OCCN(C)C	0
1262	Mianserin	24219-97-4	CN1CCN2C(C1)c3ccccc3Cc4ccccc24	0
1263	Streptozocin	18883-66-4	CN(N=O)C(=O)NC(C=O)C(O)C(O)C(O)CO	0
1264	oxprenolol	6452-71-7	CC(C)NCC(O)COc1ccccc1OCC=C	0
1265	Mirtazapine	85650-52-8	CN1CCN2C(C1)c3ccccc3Cc4cccnc24	0
1266	Antazoline	91-75-8	C(N(Cc1ccccc1)c2ccccc2)C3=NCCN3	0
1267	Nevirapine	129618-40-2	Cc1ccnc2N(C3CC3)c4ncccc4C(=O)Nc12	0
1268	dienestrol	84-17-3	CC=C(C(=CC)c1ccc(O)cc1)c2ccc(O)cc2	0
1269	practolol	6673-35-4	CC(C)NCC(O)COc1ccc(NC(=O)C)cc1	0
1270	Atenolol	29122-68-7	CC(C)NCC(O)COc1ccc(CC(=O)N)cc1	0
1271	desipramine	50-47-5	CNCCCN1c2ccccc2CCc3ccccc13	0
1272	1-(Diphenylmethyl)-Methylpiperazine	82-92-8	CN1CCN(CC1)C(c2ccccc2)c3ccccc3	0
1273	Voglibose	83480-29-9	OCC(CO)NC1CC(O)(CO)C(O)C(O)C1O	0
1274	Sulfisoxazole	127-69-5	Cc1noc(NS(=O)(=O)c2ccc(N)cc2)c1C	0
1275	apomorphine	58-00-4	CN1CCc2cccc3c2C1Cc4ccc(O)c(O)c34	0
1276	Metoprolol	37350-58-6	COCCc1ccc(OCC(O)CNC(C)C)cc1	0
1277	pipradrol	467-60-7	OC(C1CCCCN1)(c2ccccc2)c3ccccc3	0
1278	pentostatin	53910-25-1	OCC1OC(CC1O)n2cnc3C(O)CNC=Nc23	0
1279	Dexrazoxane	24584-09-6	CC(CN1CC(=O)NC(=O)C1)N2CC(=O)NC(=O)C2	0
1280	Diethylstilbestrol	56-53-1	CCC(=C(CC)c1ccc(O)cc1)c2ccc(O)cc2	0
1281	Ramacemide	128298-28-2	CC(Cc1ccccc1)(NC(=O)CN)c2ccccc2	0
1282	Moclobemide	71320-77-9	Clc1ccc(cc1)C(=O)NCCN2CCOCC2	0
1283	orphenadrine	83-98-7	CN(C)CCOC(c1ccccc1)c2ccccc2C	0
1284	Leflunomide	75706-12-6	Cc1oncc1C(=O)Nc2ccc(cc2)C(F)(F)F	0
1285	Sulfamethizole	144-82-1	Cc1nnc(NS(=O)(=O)c2ccc(N)cc2)s1	0
1286	Tolbutamide	64-77-7	CCCCNC(=O)NS(=O)(=O)c1ccc(C)cc1	0
1287	1,3,5(10)-Estratrien-3-ol-17-one	53-16-7	CC12CCC3C(CCc4cc(O)ccc34)C1CCC2=O	0
1288	doxylamine	469-21-6	CN(C)CCOC(C)(c1ccccc1)c2ccccn2	0
1289	chloroprocaine	133-16-4	CCN(CC)CCOC(=O)c1ccc(N)cc1Cl	0
1290	carbutamide	339-43-5	CCCCNC(=O)NS(=O)(=O)c1ccc(N)cc1	0
1291	cyclazocine	3572-80-3	CC1C2Cc3ccc(O)cc3C1(C)CCN2CC4CC4	0
1292	Dextromethorphan	125-71-3	COc1ccc2CC3C4CCCCC4(CCN3C)c2c1	0
1293	Muzolimine	55294-15-0	CC(N1N=C(N)CC1=O)c2ccc(Cl)c(Cl)c2	0
1294	Sotalol	3930-20-9	CC(C)NCC(O)c1ccc(NS(=O)(=O)C)cc1	0
1295	Estradiol	50-28-2	CC12CCC3C(CCc4cc(O)ccc34)C1CCC2O	0
1296	Nimustine	42471-28-3	Cc1ncc(CNC(=O)N(CCCl)N=O)c(N)n1	0
1297	Tolcapone	134308-13-7	Cc1ccc(cc1)C(=O)c2cc(O)c(O)c(c2)[N+](=O)[O-]	0
1298	Carprofen	53716-49-7	CC(C(=O)O)c1ccc2c(c1)[nH]c3ccc(Cl)cc23	0
1299	Chlormezanone	80-77-3	CN1C(c2ccc(Cl)cc2)S(=O)(=O)CCC1=O	0
1300	Nandrolone	434-22-0	CC12CCC3C(CCC4=CC(=O)CCC34)C1CCC2O	0
1301	Ropivacaine	84057-95-4	CCCN1CCCCC1C(=O)Nc2c(C)cccc2C	0
1302	(+)-chlorpheniramine	25523-97-1	CN(C)CCC(c1ccc(Cl)cc1)c2ccccn2	0
1303	1-(3-iodobenzyl)guanidine	80663-95-2	NC(=N)NCc1cccc(I)c1	0
1304	homotropine	87-00-3	CN1C2CCC1CC(C2)OC(=O)C(O)c3ccccc3	0
1305	Meticrane	1084-65-7	Cc1cc2CCCS(=O)(=O)c2cc1S(=O)(=O)N	0
1306	Physostigmine	57-47-6	CNC(=O)Oc1ccc2N(C)C3N(C)CCC3(C)c2c1	0
1307	cyclobenzaprine	303-53-7	CN(C)CCC=C1c2ccccc2C=Cc3ccccc13	0
1308	Flutamide	13311-84-7	CC(C)C(=O)Nc1ccc(c(c1)C(F)(F)F)[N+](=O)[O-]	0
1309	Sulfabenzamide	127-71-9	Nc1ccc(cc1)S(=O)(=O)NC(=O)c2ccccc2	0
1310	Cyclandelate	456-59-7	CC1CC(CC(C)(C)C1)OC(=O)C(O)c2ccccc2	0
1311	3-Ethyl-2-methyl-5-(morpholin-4-ylmethyl)-1,5,6,7-tetrahydroindol-4-one	7416-34-4	CCc1c(C)[nH]c2CCC(CN3CCOCC3)C(=O)c12	0
1312	mebhydrolin	524-81-2	CN1CCc2c(C1)c3ccccc3n2Cc4ccccc4	0
1313	Etidocaine	36637-18-0	CCCN(CC)C(CC)C(=O)Nc1c(C)cccc1C	0
1314	Chlorpropamide	94-20-2	CCCNC(=O)NS(=O)(=O)c1ccc(Cl)cc1	0
1315	Clenbuterol	37148-27-9	CC(C)(C)NCC(O)c1cc(Cl)c(N)c(Cl)c1	0
1316	Azathioprine	446-86-6	Cn1cnc(c1Sc2ncnc3nc[nH]c23)[N+](=O)[O-]	0
1317	N-Acetylprocainamide	32795-44-1	CCN(CC)CCNC(=O)c1ccc(NC(=O)C)cc1	0
1318	Venlafaxine	93413-69-5	COc1ccc(cc1)C(CN(C)C)C2(O)CCCCC2	0
1319	Maprotiline	10262-69-8	CNCCCC12CCC(c3ccccc13)c4ccccc24	0
1320	Amitriptyline	50-48-6	CN(C)CCC=C1c2ccccc2CCc3ccccc13	0
1321	Sulfamethazine	57-68-1	Cc1cc(C)nc(NS(=O)(=O)c2ccc(N)cc2)n1	0
1322	Triprolidine	486-12-4	Cc1ccc(cc1)C(=CCN2CCCC2)c3ccccn3	0
1323	Fidarestat	136087-85-9	NC(=O)C1CC2(NC(=O)NC2=O)c3cc(F)ccc3O1	0
1324	oxamniquine	21738-42-1	CC(C)NCC1CCc2cc(CO)c(cc2N1)[N+](=O)[O-]	0
1325	moxisylyte	54-32-0	CC(C)c1cc(OC(=O)C)c(C)cc1OCCN(C)C	0
1326	Doxepin	1668-19-5	CN(C)CCC=C1c2ccccc2COc3ccccc13	0
1327	Sulfameter	651-06-9	COc1cnc(NS(=O)(=O)c2ccc(N)cc2)nc1	0
1328	Sulfamethoxypyridazine	80-35-3	COc1ccc(NS(=O)(=O)c2ccc(N)cc2)nn1	0
1329	phenprocoumon	435-97-2	CCC(C1=C(O)c2ccccc2OC1=O)c3ccccc3	0
1330	4-[2-(4-carbamimidoylphenyl)ethenyl]-3-hydroxybenzenecarboximidamide	495-99-8	NC(=N)c1ccc(C=Cc2ccc(cc2O)C(=N)N)cc1	0
1331	Iramil	50-49-7	CN(C)CCCN1c2ccccc2CCc3ccccc13	0
1332	Flufenamic acid	530-78-9	OC(=O)c1ccccc1Nc2cccc(c2)C(F)(F)F	0
1333	Nitrazepam	146-22-5	[O-][N+](=O)c1ccc2NC(=O)CN=C(c3ccccc3)c2c1	0
1334	Indoprofen	31842-01-0	CC(C(=O)O)c1ccc(cc1)N2Cc3ccccc3C2=O	0
1335	diphenylpyraline	147-20-6	CN1CCC(CC1)OC(c2ccccc2)c3ccccc3	0
1336	terodiline	15793-40-5	CC(CC(c1ccccc1)c2ccccc2)NC(C)(C)C	0
1337	Niflumic acid	4394-00-7	OC(=O)c1cccnc1Nc2cccc(c2)C(F)(F)F	0
1338	Artemisinin	63968-64-9	CC1CCC2C(C)C(=O)OC3OC4(C)CCC1C23OO4	0
1339	levallorphan	152-02-3	Oc1ccc2CC3C4CCCCC4(CCN3CC=C)c2c1	0
1340	trolnitrate	7077-34-1	[O-][N+](=O)OCCN(CCO[N+](=O)[O-])CCO[N+](=O)[O-]	0
1341	Dihydroartemisinin	71939-50-9	CC1CCC2C(C)C(O)OC3OC4(C)CCC1C23OO4	0
1342	Tropisetron	89565-68-4	CN1C2CCC1CC(C2)OC(=O)c3c[nH]c4ccccc34	0
1343	4-Amino-N-(5-ethyl-[1,3,4]thiadiazol-2-yl)-benzene sulfonamide	94-19-9	CCc1nnc(NS(=O)(=O)c2ccc(N)cc2)s1	0
1344	Articaine	23964-58-1	CCCNC(C)C(=O)Nc1c(C)csc1C(=O)OC	0
1345	Promazine	58-40-2	CN(C)CCCN1c2ccccc2Sc3ccccc13	0
1346	iprindole	5560-72-5	CN(C)CCCn1c2CCCCCCc2c3ccccc13	0
1347	Sulfachlorpyridazine	80-32-0	Nc1ccc(cc1)S(=O)(=O)Nc2ccc(Cl)nn2	0
1348	Diazapam	439-14-5	CN1C(=O)CN=C(c2ccccc2)c3cc(Cl)ccc13	0
1349	Mazindol	22232-71-9	OC1(N2CCN=C2c3ccccc13)c4ccc(Cl)cc4	0
1350	Fludarabine	21679-14-1	Nc1nc(F)nc2c1ncn2C3OC(CO)C(O)C3O	0
1351	Flunoxaprofen	66934-18-7	CC(C(=O)O)c1ccc2oc(nc2c1)c3ccc(F)cc3	0
1352	hydromorphone	466-99-9	CN1CCC23C4CCC(=O)C2Oc5c(O)ccc(CC14)c35	0
1353	Morphine	57-27-2	CN1CCC23C4Oc5c(O)ccc(CC1C2C=CC4O)c35	0
1354	Probenecid	57-66-9	CCCN(CCC)S(=O)(=O)c1ccc(cc1)C(=O)O	0
1355	Pyrilamine	91-84-9	COc1ccc(CN(CCN(C)C)c2ccccn2)cc1	0
1356	Isothipendyl	482-15-5	CC(CN1c2ccccc2Sc3cccnc13)N(C)C	0
1357	pentazocine	359-83-1	CC1C2Cc3ccc(O)cc3C1(C)CCN2CC=C(C)C	0
1358	Cladribine	4291-63-8	Nc1nc(Cl)nc2c1ncn2C3CC(O)C(CO)O3	0
1359	Asenapine	65576-45-6	CN1CC2C(C1)c3cc(Cl)ccc3Oc4ccccc24	0
1360	Imirestat	89391-50-4	Fc1ccc2c3ccc(F)cc3C4(NC(=O)NC4=O)c2c1	0
1361	Abacavir	136470-78-5	Nc1nc(NC2CC2)c3ncn(C4CC(CO)C=C4)c3n1	0
1362	methallenestril	517-18-0	CCC(c1ccc2cc(OC)ccc2c1)C(C)(C)C(=O)O	0
1363	vitamin A	68-26-8	CC(=CCO)C=CC=C(C)C=CC1=C(C)CCCC1(C)C	0
1364	Oxazepam	604-75-1	OC1N=C(c2ccccc2)c3cc(Cl)ccc3NC1=O	0
1365	Tenofovir	147127-20-6	CC(Cn1cnc2c(N)ncnc12)OCP(=O)(O)O	0
1366	nifurtimox	23256-30-6	CC1CS(=O)(=O)CCN1N=Cc2oc(cc2)[N+](=O)[O-]	0
1367	Sulmazole	73384-60-8	COc1cc(ccc1c2nc3ncccc3[nH]2)S(=O)C	0
1368	Galanthamine	357-70-0	COc1ccc2CN(C)CCC34C=CC(O)CC3Oc1c24	0
1369	Etodolac	41340-25-4	CCc1cccc2c3CCOC(CC)(CC(=O)O)c3[nH]c12	0
1370	Ritodrine	26652-09-5	CC(NCCc1ccc(O)cc1)C(O)c2ccc(O)cc2	0
1371	(4R)-4-[[3-(2-Dimethylaminoethyl)-1H-indol-5-yl]methyl]oxazolidin-2-one	139264-17-8	CN(C)CCc1c[nH]c2ccc(CC3COC(=O)N3)cc12	0
1372	Cyproheptadine	129-03-3	CN1CCC(=C2c3ccccc3C=Cc4ccccc24)CC1	0
1373	cycrimine	77-39-4	OC(CCN1CCCCC1)(C2CCCC2)c3ccccc3	0
1374	procyclidine	77-37-2	OC(CCN1CCCC1)(C2CCCCC2)c3ccccc3	0
1375	Fospropofol	258516-89-1	CC(C)c1cccc(C(C)C)c1OCOP(=O)(O)O	0
1376	N-pyridin-2-yl[1,1'-biphenyl]-4-acetamide	51484-40-3	O=C(Cc1ccc(cc1)c2ccccc2)Nc3ccccn3	0
1377	Testosterone	58-22-0	CC12CCC3C(CCC4=CC(=O)CCC34C)C1CCC2O	0
1378	Dehydroepiandrosterone	53-43-0	CC12CCC3C(CC=C4CC(O)CCC34C)C1CCC2=O	0
1379	1-Butyl-N-(2,6-dimethylphenyl)-piperidine-2-carboxamide	27262-47-1	CCCCN1CCCCC1C(=O)Nc2c(C)cccc2C	0
1380	ethylestrenol	965-90-2	CCC1(O)CCC2C3CCC4=CCCCC4C3CCC12C	0
1381	Ciprofibrate	52214-84-3	CC(C)(Oc1ccc(cc1)C2CC2(Cl)Cl)C(=O)O	0
1382	Atropine	51-55-8	CN1C2CCC1CC(C2)OC(=O)C(CO)c3ccccc3	0
1383	caramiphen	77-22-5	CCN(CC)CCOC(=O)C1(CCCC1)c2ccccc2	0
1384	dyclonine	586-60-7	CCCCOc1ccc(cc1)C(=O)CCN2CCCCC2	0
1385	Triclosan	3380-34-5	Oc1cc(Cl)ccc1Oc2ccc(Cl)cc2Cl	0
1386	quinethazone	73-49-4	CCC1NC(=O)c2cc(c(Cl)cc2N1)S(=O)(=O)N	0
1387	clofedanol	791-35-5	CN(C)CCC(O)(c1ccccc1)c2ccccc2Cl	0
1388	sultiame	61-56-3	NS(=O)(=O)c1ccc(cc1)N2CCCCS2(=O)=O	0
1389	Octyl 4-methoxycinnamate	5466-77-3	CCCCC(CC)COC(=O)C=Cc1ccc(OC)cc1	0
1390	AzatadineMaleate	3964-81-6	CN1CCC(=C2c3ccccc3CCc4cccnc24)CC1	0
1391	carbinoxamine	486-16-8	CN(C)CCOC(c1ccc(Cl)cc1)c2ccccn2	0
1392	pecilocin	19504-77-9	CCCCC(O)C=C(C)C=CC=CC(=O)N1CCCC1=O	0
1393	eucatropine	100-91-4	CC1CC(CC(C)(C)N1C)OC(=O)C(O)c2ccccc2	0
1394	Penbutolol	38363-40-5	CC(C)(C)NCC(O)COc1ccccc1C2CCCC2	0
1395	zomepirac	33369-31-2	Cc1cc(CC(=O)O)n(C)c1C(=O)c2ccc(Cl)cc2	0
1396	dimethindene	5636-83-9	CC(C1=C(CCN(C)C)Cc2ccccc12)c3ccccn3	0
1397	Oxaprozin	21256-18-8	OC(=O)CCc1oc(c2ccccc2)c(n1)c3ccccc3	0
1398	Ondansetron	99614-02-5	Cc1nccn1CC2CCc3c(C2=O)c4ccccc4n3C	0
1399	Anastrozole	120511-73-1	CC(C)(C#N)c1cc(Cn2cncn2)cc(c1)C(C)(C)C#N	0
1400	pramocaine	140-65-8	CCCCOc1ccc(OCCCN2CCOCC2)cc1	0
1401	Butriptyline	35941-65-2	CC(CC1c2ccccc2CCc3ccccc13)CN(C)C	0
1402	Sulfacytine	17784-12-2	CCN1C=CC(=NC1=O)NS(=O)(=O)c2ccc(N)cc2	0
1403	alosetron	122852-42-0	Cc1nc[nH]c1CN2CCc3c(C2=O)c4ccccc4n3C	0
1404	propoxycaine	86-43-1	CCCOc1cc(N)ccc1C(=O)OCCN(CC)CC	0
1405	Noxiptiline	3362-45-6	CN(C)CCON=C1c2ccccc2CCc3ccccc13	0
1406	Dimetacrine	4757-55-5	CN(C)CCCN1c2ccccc2C(C)(C)c3ccccc13	0
1407	Trimipramine	739-71-9	CC(CN(C)C)CN1c2ccccc2CCc3ccccc13	0
1408	bucloxic acid	32808-51-8	OC(=O)CCC(=O)c1ccc(C2CCCCC2)c(Cl)c1	0
1409	Mebendazole	31431-39-7	COC(=O)Nc1nc2cc(ccc2[nH]1)C(=O)c3ccccc3	0
1410	Esmolol	81147-92-4	COC(=O)CCc1ccc(OCC(O)CNC(C)C)cc1	0
1411	Dibenzepin	4498-32-2	CN(C)CCN1C(=O)c2ccccc2N(C)c3ccccc13	0
1412	Pizotifen	15574-96-6	CN1CCC(=C2c3ccccc3CCc4sccc24)CC1	0
1413	dosulepin	113-53-1	CN(C)CCC=C1c2ccccc2CSc3ccccc13	0
1414	Chlorothiazide	58-94-6	NS(=O)(=O)c1cc2c(cc1Cl)N=CNS2(=O)=O	0
1415	Meclofenamic acid	644-62-2	Cc1ccc(Cl)c(Nc2ccccc2C(=O)O)c1Cl	0
1416	Bentazepam	29462-18-8	O=C1CN=C(c2ccccc2)c3c4CCCCc4sc3N1	0
1417	Exemestane	107868-30-4	CC12CCC3C(CC(=C)C4=CC(=O)C=CC34C)C1CCC2=O	0
1418	Ethynyl estradiol	57-63-6	CC12CCC3C(CCc4cc(O)ccc34)C1CCC2(O)C#C	0
1419	Imipramine N-Oxide Monohydrate	6829-98-7	C[N+](C)([O-])CCCN1c2ccccc2CCc3ccccc13	0
1420	methdilazine	1982-37-2	CN1CCC(CN2c3ccccc3Sc4ccccc24)C1	0
1421	fenclofenac	34645-84-6	OC(=O)Cc1ccccc1Oc2ccc(Cl)cc2Cl	0
1422	Imazalil	35554-44-0	Clc1ccc(C(Cn2ccnc2)OCC=C)c(Cl)c1	0
1423	Nelarabine	121032-29-9	COc1nc(N)nc2c1ncn2C3OC(CO)C(O)C3O	0
1424	Duloxetine	116539-59-4	CNCCC(Oc1cccc2ccccc12)c3cccs3	0
1425	Hydrochlorothiazide	58-93-5	NS(=O)(=O)c1cc2c(NCNS2(=O)=O)cc1Cl	0
1426	Nialamide	51-12-7	O=C(CCNNC(=O)c1ccncc1)NCc2ccccc2	0
1427	artemether	71963-77-4	COC1OC2OC3(C)CCC4C(C)CCC(C1C)C24OO3	0
1428	Norethindrone	68-22-4	CC12CCC3C(CCC4=CC(=O)CCC34)C1CCC2(O)C#C	0
1429	norethynodrel	68-23-5	CC12CCC3C(CCC4=C3CCC(=O)C4)C1CCC2(O)C#C	0
1430	Trimeprazine	84-96-8	CC(CN(C)C)CN1c2ccccc2Sc3ccccc13	0
1431	rosaprostol	56695-65-9	CCCCCCC1CCC(O)C1CCCCCCC(=O)O	0
1432	Imipenem	64221-86-9	CC(O)C1C2CC(=C(N2C1=O)C(=O)O)SCCNC=N	0
1433	Codeine	76-57-3	COc1ccc2CC3C4C=CC(O)C5Oc1c2C45CCN3C	0
1434	hydrocodone	125-29-1	COc1ccc2CC3C4CCC(=O)C5Oc1c2C45CCN3C	0
1435	Nylidrin	447-41-6	CC(CCc1ccccc1)NC(C)C(O)c2ccc(O)cc2	0
1436	Chlordiazepoxide	58-25-3	CNC1=Nc2ccc(Cl)cc2C(=[N+]([O-])C1)c3ccccc3	0
1437	4-Amino-5-chloro-N-(2-(diethylamino)ethyl)-2-methoxybenzamide	364-62-5	CCN(CC)CCNC(=O)c1cc(Cl)c(N)cc1OC	0
1438	Tazobactan acid	89786-04-9	CC1(Cn2ccnn2)C(N3C(CC3=O)S1(=O)=O)C(=O)O	0
1439	azapropazone	13539-59-8	CCCC1C(=O)N2N(C1=O)c3cc(C)ccc3N=C2N(C)C	0
1440	Testolactone	968-93-4	CC12CCC3C(CCC4=CC(=O)C=CC34C)C1CCC(=O)O2	0
1441	9-cis-retinoic acid	5300-03-8	CC(=CC=CC(=CC(=O)O)C)C=CC1=C(C)CCCC1(C)C	0
1442	Metandienone	72-63-9	CC1(O)CCC2C3CCC4=CC(=O)C=CC4(C)C3CCC12C	0
1443	Clobazam	22316-47-8	CN1C(=O)CC(=O)N(c2ccccc2)c3cc(Cl)ccc13	0
1444	chlorcyclizine	82-93-9	CN1CCN(CC1)C(c2ccccc2)c3ccc(Cl)cc3	0
1445	Oxymorphone	76-41-5	CN1CCC23C4Oc5c(O)ccc(CC1C2(O)CCC4=O)c35	0
1446	dihydrocodeine	125-28-0	COc1ccc2CC3C4CCC(O)C5Oc1c2C45CCN3C	0
1447	dobutamine	34368-04-2	CC(CCc1ccc(O)cc1)NCCc2ccc(O)c(O)c2	0
1448	isoxsuprine	395-28-8	CC(COc1ccccc1)NC(C)C(O)c2ccc(O)cc2	0
1449	Tegaserod	145158-71-0	CCCCCNC(=N)NN=Cc1c[nH]c2ccc(OC)cc12	0
1450	Trihexylphenedyl	144-11-6	OC(CCN1CCCCC1)(C2CCCCC2)c3ccccc3	0
1451	Uniprofen	51234-28-7	CC(C(=O)O)c1ccc2oc(nc2c1)c3ccc(Cl)cc3	0
1452	eritrityl tetranitrate	7297-25-8	[O-][N+](=O)OCC(O[N+](=O)[O-])C(CO[N+](=O)[O-])O[N+](=O)[O-]	0
1453	olsalazina	15722-48-2	OC(=O)c1cc(ccc1O)N=Nc2ccc(O)c(c2)C(=O)O	0
1454	17-Methyltestosterone	58-18-4	CC1(O)CCC2C3CCC4=CC(=O)CCC4(C)C3CCC12C	0
1455	Ethacrynic acid	58-54-8	CCC(=C)C(=O)c1ccc(OCC(=O)O)c(Cl)c1Cl	0
1456	1-(4-iodophenyl)-N-isopropylpropan-2-amine	95896-48-3	CC(C)NC(C)Cc1ccc(I)cc1	0
1457	Flumazenil	78755-81-4	CCOC(=O)c1ncn2c1CN(C)C(=O)c3cc(F)ccc23	0
1458	Retigabine	150812-12-7	CCOC(=O)Nc1ccc(NCc2ccc(F)cc2)cc1N	0
1459	Cocaine	50-36-2	COC(=O)C1C(CC2CCC1N2C)OC(=O)c3ccccc3	0
1460	Fenoterol	13392-18-2	CC(Cc1ccc(O)cc1)NCC(O)c2cc(O)cc(O)c2	0
1461	Vildagliptin	274901-16-5	OC12CC3CC(C1)CC(C3)(C2)NCC(=O)N4CCCC4C#N	0
1462	Clofarabine	123318-82-1	Nc1nc(Cl)nc2c1ncn2C3OC(CO)C(O)C3F	0
1463	Chlorphenoxamine	77-38-3	CN(C)CCOC(C)(c1ccccc1)c2ccc(Cl)cc2	0
1464	phenoxybenzamine	59-96-1	CC(COc1ccccc1)N(CCCl)Cc2ccccc2	0
1465	Chloroambucil	305-03-3	OC(=O)CCCc1ccc(cc1)N(CCCl)CCCl	0
1466	Methandriol	521-10-8	CC1(O)CCC2C3CC=C4CC(O)CCC4(C)C3CCC12C	0
1467	Dromostanolone	58-19-5	CC1CC2(C)C(CCC3C4CCC(O)C4(C)CCC23)CC1=O	0
1468	clobuzarit	22494-47-9	CC(C)(OCc1ccc(cc1)c2ccc(Cl)cc2)C(=O)O	0
1469	Dichlorphenamide	120-97-8	NS(=O)(=O)c1cc(Cl)c(Cl)c(c1)S(=O)(=O)N	0
1470	Melphalan	148-82-3	NC(Cc1ccc(cc1)N(CCCl)CCCl)C(=O)O	0
1471	Entacapone	130929-57-6	CCN(CC)C(=O)C(=Cc1cc(O)c(O)c(c1)[N+](=O)[O-])C#N	0
1472	Zaleplon	151319-34-5	CCN(C(=O)C)c1cccc(c1)c2ccnc3c(cnn23)C#N	0
1473	Clioquinol	130-26-7	Oc1c(I)cc(Cl)c2cccnc12	0
1474	nicofibrate	31980-29-7	CC(C)(Oc1ccc(Cl)cc1)C(=O)OCc2cccnc2	0
1475	Fenoldopam	67227-56-9	Oc1ccc(cc1)C2CNCCc3c(Cl)c(O)c(O)cc23	0
1476	Sertraline	79617-96-2	CNC1CCC(c2ccc(Cl)c(Cl)c2)c3ccccc13	0
1477	Fluconazole	86386-73-4	OC(Cn1cncn1)(Cn2cncn2)c3ccc(F)cc3F	0
1478	Ruxolitinib	941678-49-5	N#CCC(C1CCCC1)n2cc(cn2)c3ncnc4[nH]ccc34	0
1479	Oxandrolone	53-39-4	CC1(O)CCC2C3CCC4CC(=O)OCC4(C)C3CCC12C	0
1480	Nitazoxanide	55981-09-4	CC(=O)Oc1ccccc1C(=O)Nc2ncc(s2)[N+](=O)[O-]	0
1481	Buflomedil	55837-25-7	COc1cc(OC)c(C(=O)CCCN2CCCC2)c(OC)c1	0
1482	ibopamine	66195-31-1	CNCCc1ccc(OC(=O)C(C)C)c(OC(=O)C(C)C)c1	0
1483	Zolpidem	82626-48-0	CN(C)C(=O)Cc1c(nc2ccc(C)cn12)c3ccc(C)cc3	0
1484	Tolnaftate	2398-96-1	CN(C(=S)Oc1ccc2ccccc2c1)c3cccc(C)c3	0
1485	benzatropine	86-13-5	CN1C2CCC1CC(C2)OC(c3ccccc3)c4ccccc4	0
1486	2-(3,5-Dichlorophenyl)-6-benzoxazole carboxylic acid	594839-88-0	OC(=O)c1ccc2nc(oc2c1)c3cc(Cl)cc(Cl)c3	0
1487	Nimesulide	51803-78-2	CS(=O)(=O)Nc1ccc(cc1Oc2ccccc2)[N+](=O)[O-]	0
1488	warfarin	81-81-2	CC(=O)CC(C1=C(O)c2ccccc2OC1=O)c3ccccc3	0
1489	Phenylbutazone	50-33-9	CCCCC1C(=O)N(N(C1=O)c2ccccc2)c3ccccc3	0
1490	Oxybuprocaine	99-43-4	CCCCOc1cc(ccc1N)C(=O)OCCN(CC)CC	0
1491	indecainide	74517-78-5	CC(C)NCCCC1(C(=O)N)c2ccccc2c3ccccc13	0
1492	Fluoxetine	54910-89-3	CNCCC(Oc1ccc(cc1)C(F)(F)F)c2ccccc2	0
1493	sulfisoxazole acetyl	80-74-0	CC(=O)N(c1onc(C)c1C)S(=O)(=O)c2ccc(N)cc2	0
1494	N-[5-(2-methoxyethoxy)pyrimidin-2-yl]benzenesulfonamide	339-44-6	COCCOc1cnc(NS(=O)(=O)c2ccccc2)nc1	0
1495	Nadolol	42200-33-9	CC(C)(C)NCC(O)COc1cccc2CC(O)C(O)Cc12	0
1496	Difenidol	972-02-1	OC(CCCN1CCCCC1)(c2ccccc2)c3ccccc3	0
1497	6-(dimethylamino)-4,4-diphenylheptan-3-one	76-99-3	CCC(=O)C(CC(C)N(C)C)(c1ccccc1)c2ccccc2	0
1498	dicycloverine	77-19-0	CCN(CC)CCOC(=O)C1(CCCCC1)C2CCCCC2	0
1499	Romazarit	109543-76-2	Cc1nc(oc1COC(C)(C)C(=O)O)c2ccc(Cl)cc2	0
1500	Brofaromine	63638-91-5	COc1cc(Br)c2oc(cc2c1)C3CCNCC3	0
1501	Sulfadimethoxine	122-11-2	COc1cc(NS(=O)(=O)c2ccc(N)cc2)nc(OC)n1	0
1502	Sulfadoxine	2447-57-6	COc1ncnc(NS(=O)(=O)c2ccc(N)cc2)c1OC	0
1503	Bifonazole	60628-96-8	c1ccc(cc1)C(c2ccc(cc2)c3ccccc3)n4ccnc4	0
1504	17a-Ethynyl-1,3,5(10)-estratriene-3,17b-diol 3-methyl ether	72-33-3	COc1ccc2C3CCC4(C)C(CCC4(O)C#C)C3CCc2c1	0
1505	pecazine	60-89-9	CN1CCCC(CN2c3ccccc3Sc4ccccc24)C1	0
1506	Desogestrel	54024-22-5	CCC12CC(=C)C3C(CCC4=CCCCC34)C1CCC2(O)C#C	0
1507	croconazole	77175-51-0	Clc1cccc(COc2ccccc2C(=C)n3ccnc3)c1	0
1508	Desloratadine	100643-71-8	Clc1ccc2C(=C3CCNCC3)c4ncccc4CCc2c1	0
1509	nalorphine	62-67-9	OC1C=CC2C3Cc4ccc(O)c5OC1C2(CCN3CC=C)c45	0
1510	adiphenine	64-95-9	CCN(CC)CCOC(=O)C(c1ccccc1)c2ccccc2	0
1511	Bipariden	514-65-8	OC(CCN1CCCCC1)(C2CC3CC2C=C3)c4ccccc4	0
1512	Lodoxamide	53882-12-5	OC(=O)C(=O)Nc1cc(cc(NC(=O)C(=O)O)c1Cl)C#N	0
1513	1-(4-(4-chlorophenyl)-3-phenylbut-2-enyl)pyrrolidine	91-82-7	Clc1ccc(CC(=CCN2CCCC2)c3ccccc3)cc1	0
1514	Arteether	75887-54-6	CCOC1OC2OC3(C)CCC4C(C)CCC(C1C)C24OO3	0
1515	oseltamivir	196618-13-0	CCOC(=O)C1=CC(OC(CC)CC)C(NC(=O)C)C(N)C1	0
1516	Praziquantel	55268-74-1	O=C(C1CCCCC1)N2CC3N(CCc4ccccc34)C(=O)C2	0
1517	Granisetron	109889-09-0	CN1C2CCCC1CC(C2)NC(=O)c3nn(C)c4ccccc34	0
1518	Olanzapine	132539-06-1	CN1CCN(CC1)C2=Nc3ccccc3Nc4sc(C)cc24	0
1519	Dydrogesterone	152-62-5	CC(=O)C1CCC2C3C=CC4=CC(=O)CCC4(C)C3CCC12C	0
1520	Norgestrel	6533-00-2	CCC12CCC3C(CCC4=CC(=O)CCC34)C1CCC2(O)C#C	0
1521	Ethisterone	434-03-7	CC12CCC(=O)C=C1CCC3C2CCC4(C)C3CCC4(O)C#C	0
1522	ethopropazine	522-00-9	CCN(CC)C(C)CN1c2ccccc2Sc3ccccc13	0
1523	lonazolac	53808-88-1	OC(=O)Cc1cn(nc1c2ccc(Cl)cc2)c3ccccc3	0
1524	Flubendazole	31430-15-6	COC(=O)Nc1nc2cc(ccc2[nH]1)C(=O)c3ccc(F)cc3	0
1525	Flunitrazepam	1622-62-4	CN1C(=O)CN=C(c2ccccc2F)c3cc(ccc13)[N+](=O)[O-]	0
1526	Reboxetine	98769-81-4	CCOc1ccccc1OC(C2CNCCO2)c3ccccc3	0
1527	Oxyfedrine	15687-41-9	COc1cccc(c1)C(=O)CCNC(C)C(O)c2ccccc2	0
1528	Amoxapine	14028-44-5	Clc1ccc2Oc3ccccc3N=C(N4CCNCC4)c2c1	0
1529	Dantrolene	7261-97-4	[O-][N+](=O)c1ccc(cc1)c2oc(C=NN3CC(=O)NC3=O)cc2	0
1530	Rofecoxib	162011-90-7	CS(=O)(=O)c1ccc(cc1)C2=C(C(=O)OC2)c3ccccc3	0
1531	Ranitidine hydrochloride	66357-35-5	CNC(=C[N+](=O)[O-])NCCSCc1oc(CN(C)C)cc1	0
1532	estradiol 3-acetate	4245-41-4	CC(=O)Oc1ccc2C3CCC4(C)C(O)CCC4C3CCc2c1	0
1533	Delta9-Tetrahydro Cannabinol	1972-08-3	CCCCCc1cc(O)c2C3C=C(C)CCC3C(C)(C)Oc2c1	0
1534	Progesterone	57-83-0	CC(=O)C1CCC2C3CCC4=CC(=O)CCC4(C)C3CCC12C	0
1535	Pergolide	66104-22-1	CCCN1CC(CSC)CC2C1Cc3c[nH]c4cccc2c34	0
1536	clorazepate	23887-31-2	OC(=O)C1N=C(c2ccccc2)c3cc(Cl)ccc3NC1=O	0
1537	Clomipramine	303-49-1	CN(C)CCCN1c2ccccc2CCc3ccc(Cl)cc13	0
1538	Saxagliptin	361442-04-8	NC(C(=O)N1C(CC2CC12)C#N)C34CC5CC(CC(O)(C5)C3)C4	0
1539	neupro	99755-59-6	CCCN(CCc1cccs1)C2CCc3c(O)cccc3C2	0
1540	Efavirenz	154598-52-4	FC(F)(F)C1(OC(=O)Nc2ccc(Cl)cc12)C#CC3CC3	0
1541	Chlorprothixene	113-59-7	CN(C)CCC=C1c2ccccc2Sc3ccc(Cl)cc13	0
1542	Pentaerythritol tetranitrate	78-11-5	[O-][N+](=O)OCC(CO[N+](=O)[O-])(CO[N+](=O)[O-])CO[N+](=O)[O-]	0
1543	Bromazepam	1812-30-2	Brc1ccc2NC(=O)CN=C(c3ccccn3)c2c1	0
1544	Febuxostat	144060-53-7	CC(C)COc1ccc(cc1C#N)c2nc(C)c(s2)C(=O)O	0
1545	Calusterone	17021-26-0	CC1CC2=CC(=O)CCC2(C)C3CCC4(C)C(CCC4(C)O)C13	0
1546	Nilutamide	63612-50-0	CC1(C)NC(=O)N(C1=O)c2ccc(c(c2)C(F)(F)F)[N+](=O)[O-]	0
1547	3,3-Bis(4-hydroxyphenyl)indolin-2-one	125-13-3	Oc1ccc(cc1)C2(C(=O)Nc3ccccc23)c4ccc(O)cc4	0
1548	4-[(1R)-1-hydroxy-2-[4-(4-hydroxyphenyl)butylamino]ethyl]benzene-1,2-diol	128470-16-6	OC(CNCCCCc1ccc(O)cc1)c2ccc(O)c(O)c2	0
1549	tetrabenazine	58-46-8	COc1cc2CCN3CC(CC(C)C)C(=O)CC3c2cc1OC	0
1550	Nateglinide	105816-04-4	CC(C)C1CCC(CC1)C(=O)NC(Cc2ccccc2)C(=O)O	0
1551	N-Methyl-N-(naphthalen-1-ylmethyl)-1-(4-tert-butylphenyl)methanamine	101828-21-1	CN(Cc1ccc(cc1)C(C)(C)C)Cc2cccc3ccccc23	0
1552	Pazufloxacin	127045-41-4	CC1COc2c3N1C=C(C(=O)O)C(=O)c3cc(F)c2C4(N)CC4	0
1553	Phenolphthalein	77-09-8	Oc1ccc(cc1)C2(OC(=O)c3ccccc23)c4ccc(O)cc4	0
1554	Fluvoxamine	54739-18-3	COCCCCC(=NOCCN)c1ccc(cc1)C(F)(F)F	0
1555	Tiludronic acid	89987-06-4	OP(=O)(O)C(Sc1ccc(Cl)cc1)P(=O)(O)O	0
1556	Fenofibric acid	42017-89-0	CC(C)(Oc1ccc(cc1)C(=O)c2ccc(Cl)cc2)C(=O)O	0
1557	Chlorpromazine	50-53-3	CN(C)CCCN1c2ccccc2Sc3ccc(Cl)cc13	0
1558	dexbrompheniramine	132-21-8	CN(C)CCC(c1ccc(Br)cc1)c2ccccn2	0
1559	Norfloxacin	70458-96-7	CCN1C=C(C(=O)O)C(=O)c2cc(F)c(cc12)N3CCNCC3	0
1560	Epalrestat	82159-09-9	CC(=Cc1ccccc1)C=C2SC(=S)N(CC(=O)O)C2=O	0
1561	Lanoconazole	101530-10-3	Clc1ccccc1C2CSC(=C(C#N)n3ccnc3)S2	0
1562	chloroquine	54-05-7	CCN(CC)CCCC(C)Nc1ccnc2cc(Cl)ccc12	0
1563	1-(2-chlorophenyl)-1-(4-chlorophenyl)-2,2-dichloroethane	53-19-0	ClC(Cl)C(c1ccc(Cl)cc1)c2ccccc2Cl	0
1564	Enoxacin	74011-58-8	CCN1C=C(C(=O)O)C(=O)c2cc(F)c(nc12)N3CCNCC3	0
1565	Mycophenolic acid	24280-93-1	COc1c(C)c2COC(=O)c2c(O)c1CC=C(C)CCC(=O)O	0
1566	Feprazone	30748-29-9	CC(=CCC1C(=O)N(N(C1=O)c2ccccc2)c3ccccc3)C	0
1567	Fenirofibrate	54419-31-7	CC(C)(Oc1ccc(cc1)C(O)c2ccc(Cl)cc2)C(=O)O	0
1568	Lorazepam	846-49-1	OC1N=C(c2ccccc2Cl)c3cc(Cl)ccc3NC1=O	0
1569	Etybenzatropine	524-83-4	CCN1C2CCC1CC(C2)OC(c3ccccc3)c4ccccc4	0
1570	Clopidogrel	113665-84-2	COC(=O)C(N1CCc2sccc2C1)c3ccccc3Cl	0
1571	Kebuzone	853-34-9	CC(=O)CCC1C(=O)N(N(C1=O)c2ccccc2)c3ccccc3	0
1572	mequitazine	29216-28-2	C(C1CN2CCC1CC2)N3c4ccccc4Sc5ccccc35	0
1573	Aprindine	37640-71-4	CCN(CC)CCCN(C1Cc2ccccc2C1)c3ccccc3	0
1574	5-[3-ethoxy-4-(pentyloxy)phenyl]-1,3-thiazolidine-2,4-dione	79714-31-1	CCCCCOc1ccc(cc1OCC)C2SC(=O)NC2=O	0
1575	Gliclazide	21187-98-4	Cc1ccc(cc1)S(=O)(=O)NC(=O)NN2CC3CCCC3C2	0
1576	piperidolate	82-98-4	CCN1CCCC(C1)OC(=O)C(c2ccccc2)c3ccccc3	0
1577	Valaciclovir	124832-26-4	CC(C)C(N)C(=O)OCCOCn1cnc2C(=O)N=C(N)Nc12	0
1578	(2alpha,6alpha,8alpha,9abeta)-Octahydro-3-oxo-2,6-methano-2H-quinolizin-8-yl-1H-indole-3-carboxylate	115956-12-2	O=C(OC1CC2CC3CC(C1)N2CC3=O)c4c[nH]c5ccccc45	0
1579	Citalopram	59729-33-8	CN(C)CCCC1(OCc2cc(ccc12)C#N)c3ccc(F)cc3	0
1580	norastemizole	75970-99-9	Fc1ccc(Cn2c(NC3CCNCC3)nc4ccccc24)cc1	0
1581	Acetohexamide	968-81-0	CC(=O)c1ccc(cc1)S(=O)(=O)NC(=O)NC2CCCCC2	0
1582	Quinidine	56-54-2	COc1ccc2nccc(C(O)C3CC4CCN3CC4C=C)c2c1	0
1583	Etonogestrel	54048-10-1	CCC12CC(=C)C3C(CCC4=CC(=O)CCC34)C1CCC2(O)C#C	0
1584	Prazepam	2955-38-6	Clc1ccc2N(CC3CC3)C(=O)CN=C(c4ccccc4)c2c1	0
1585	Dulofibrate	61887-16-9	CC(C)(Oc1ccc(Cl)cc1)C(=O)Oc2ccc(Cl)cc2	0
1586	Piritrexim	72732-56-0	COc1ccc(OC)c(Cc2cnc3nc(N)nc(N)c3c2C)c1	0
1587	ergonovine	60-79-7	CC(CO)NC(=O)C1CN(C)C2Cc3c[nH]c4cccc(C2=C1)c34	0
1588	Mecillinam	32887-01-7	CC1(C)SC2C(N=CN3CCCCCC3)C(=O)N2C1C(=O)O	0
1589	Bisoprolol	66722-44-9	CC(C)NCC(O)COc1ccc(COCCOC(C)C)cc1	0
1590	Midazolam	59467-70-8	Cc1ncc2CN=C(c3ccccc3F)c4cc(Cl)ccc4n12	0
1591	bumadizone	3583-64-0	CCCCC(C(=O)O)C(=O)N(Nc1ccccc1)c2ccccc2	0
1592	Ajmaline	4360-12-7	CCC1C2CC3C4N(C)c5ccccc5C46CC(C2C6O)N3C1O	0
1593	docosanol	30303-65-2	CCCCCCCCCCCCCCCCCCCCCCO	0
1594	Clozapine	5786-21-0	CN1CCN(CC1)C2=Nc3cc(Cl)ccc3Nc4ccccc24	0
1595	Niclosamide	50-65-7	Oc1ccc(Cl)cc1C(=O)Nc2ccc(cc2Cl)[N+](=O)[O-]	0
1596	Naloxone	465-65-6	Oc1ccc2CC3N(CC=C)CCC45C(Oc1c24)C(=O)CCC35O	0
1597	Benactyzine	302-40-9	CCN(CC)CCOC(=O)C(O)(c1ccccc1)c2ccccc2	0
1598	Butorphanol	42408-82-2	Oc1ccc2CC3N(CC4CCC4)CCC5(CCCCC35O)c2c1	0
1599	Deacetylnorgestimate	53016-31-2	CCC12CCC3C(CCC4=CC(=NO)CCC34)C1CCC2(O)C#C	0
1600	Tifenamil	82-99-5	CCN(CC)CCSC(=O)C(c1ccccc1)c2ccccc2	0
1601	loxapine	1977-10-2	CN1CCN(CC1)C2=Nc3ccccc3Oc4ccc(Cl)cc24	0
1602	Dilevalol	75659-07-3	CC(CCc1ccccc1)NCC(O)c2ccc(O)c(c2)C(=O)N	0
1603	Tiapride	51012-32-9	CCN(CC)CCNC(=O)c1cc(ccc1OC)S(=O)(=O)C	0
1604	Levomepromazine	60-99-1	COc1ccc2Sc3ccccc3N(CC(C)CN(C)C)c2c1	0
1605	Stanozolol	10418-03-8	CC1(O)CCC2C3CCC4Cc5[nH]ncc5CC4(C)C3CCC12C	0
1606	2-(2-nitro-4-trifluoromethylbenzoyl)-1,3-cyclohexanedione	104206-65-7	[O-][N+](=O)c1cc(ccc1C(=O)C2C(=O)CCCC2=O)C(F)(F)F	0
1607	Paroxetine	61869-08-7	Fc1ccc(cc1)C2CCNCC2COc3ccc4OCOc4c3	0
1608	Gabapentin enacarbil	478296-72-9	CC(C)C(=O)OC(C)OC(=O)NCC1(CC(=O)O)CCCCC1	0
1609	Trilostane	13647-35-3	CC12CCC3C(CCC45OC4C(=O)C(CC35C)C#N)C1CCC2O	0
1610	prenylamine	390-64-7	CC(Cc1ccccc1)NCCC(c2ccccc2)c3ccccc3	0
1611	Timofibrate	64179-54-0	CC(C)(Oc1ccc(Cl)cc1)C(=O)N2CSCC2C(=O)O	0
1612	4-(p-Chlorophenyl)-2-phenyl-5-thiazoleacetic acid	18046-21-4	OC(=O)Cc1sc(nc1c2ccc(Cl)cc2)c3ccccc3	0
1613	pirazolac	71002-09-0	OC(=O)Cc1nn(cc1c2ccc(Cl)cc2)c3ccc(F)cc3	0
1614	Furosemide	54-31-9	NS(=O)(=O)c1cc(C(=O)O)c(NCc2occc2)cc1Cl	0
1615	Hydroflumethiazide	135-09-1	NS(=O)(=O)c1cc2c(NCNS2(=O)=O)cc1C(F)(F)F	0
1616	protokylol	136-70-9	CC(Cc1ccc2OCOc2c1)NCC(O)c3ccc(O)c(O)c3	0
1617	dimethyl[(4-{[(2-{[1-(methylamino)-2-nitroethenyl]amino}ethyl)sulfanyl]methyl}-1,3-thiazol-2-yl)methyl]amine	76963-41-2	CNC(=C[N+](=O)[O-])NCCSCc1csc(CN(C)C)n1	0
1618	Zotepine	26615-21-4	CN(C)CCOC1=Cc2ccccc2Sc3ccc(Cl)cc13	0
1619	Zanamivir	139110-80-8	CC(=O)NC1C(NC(=N)N)C=C(OC1C(O)C(O)CO)C(=O)O	0
1620	Spectinomycin	1695-77-8	CNC1C(O)C(NC)C2OC3(O)C(OC(C)CC3=O)OC2C1O	0
1621	Oxymetholone	434-07-1	CC1(O)CCC2C3CCC4CC(=O)C(=CO)CC4(C)C3CCC12C	0
1622	alfaxalone	23930-19-0	CC(=O)C1CCC2C3CCC4CC(O)CCC4(C)C3C(=O)CC12C	0
1623	Pefloxacin	70458-92-3	CCN1C=C(C(=O)O)C(=O)c2cc(F)c(cc12)N3CCN(C)CC3	0
1624	pentoxyverine	77-23-6	CCN(CC)CCOCCOC(=O)C1(CCCC1)c2ccccc2	0
1625	bromodiphenhydramine	118-23-0	CN(C)CCOC(c1ccccc1)c2ccc(Br)cc2	0
1626	Mitomycin	50-07-7	COC12C3NC3CN1C4=C(C2COC(=O)N)C(=O)C(=C(C)C4=O)N	0
1627	benzylpenicillin	61-33-6	CC1(C)SC2C(NC(=O)Cc3ccccc3)C(=O)N2C1C(=O)O	0
1628	Progabide	62666-20-0	NC(=O)CCCN=C(c1ccc(Cl)cc1)c2cc(F)ccc2O	0
1629	Lormetazepam	848-75-9	CN1C(=O)C(O)N=C(c2ccccc2Cl)c3cc(Cl)ccc13	0
1630	isoxicam	34552-84-6	CN1C(=C(O)c2ccccc2S1(=O)=O)C(=O)Nc3cc(C)on3	0
1631	naratriptan	121679-13-8	CNS(=O)(=O)CCc1ccc2[nH]cc(C3CCN(C)CC3)c2c1	0
1632	Almotriptan	154323-57-6	CN(C)CCc1c[nH]c2ccc(CS(=O)(=O)N3CCCC3)cc12	0
1633	Pirifibrate	55285-45-5	CC(C)(Oc1ccc(Cl)cc1)C(=O)OCc2cccc(CO)n2	0
1634	2-[[4-[(7-Chloroquinolin-4-yl)amino]pentyl](ethyl)amino]ethanol	118-42-3	CCN(CCO)CCCC(C)Nc1ccnc2cc(Cl)ccc12	0
1635	dicumarol	66-76-2	OC1=C(CC2=C(O)c3ccccc3OC2=O)C(=O)Oc4ccccc14	0
1636	Acebutolol	37517-30-9	CCCC(=O)Nc1ccc(OCC(O)CNC(C)C)c(c1)C(=O)C	0
1637	Fluoxymesterone	76-43-7	CC1(O)CCC2C3CCC4=CC(=O)CCC4(C)C3(F)C(O)CC12C	0
1638	Fentanyl	437-38-7	CCC(=O)N(C1CCN(CCc2ccccc2)CC1)c3ccccc3	0
1639	Linezolid	165800-03-3	CC(=O)NCC1CN(C(=O)O1)c2ccc(N3CCOCC3)c(F)c2	0
1640	Tenoxicam	59804-37-4	CN1C(=C(O)c2sccc2S1(=O)=O)C(=O)Nc3ccccn3	0
1641	propyl 4-diethylcarbamoylmethoxy-3-methoxyphenylacetate	1421-14-3	CCCOC(=O)Cc1ccc(OCC(=O)N(CC)CC)c(OC)c1	0
1642	Famotidine	76824-35-6	NC(=Nc1nc(CSCCC(=NS(=O)(=O)N)N)cs1)N	0
1643	Amineptine	57574-09-1	OC(=O)CCCCCCNC1c2ccccc2CCc3ccccc13	0
1644	Danazol	17230-88-5	CC12Cc3cnoc3C=C1CCC4C2CCC5(C)C4CCC5(O)C#C	0
1645	Lobeline	90-69-7	CN1C(CC(O)c2ccccc2)CCCC1CC(=O)c3ccccc3	0
1646	Perfluorohexane	355-42-0	FC(F)(F)C(F)(F)C(F)(F)C(F)(F)C(F)(F)C(F)(F)F	0
1647	Piperonyl butoxide	51-03-6	CCCCOCCOCCOCc1cc2OCOc2cc1CCC	0
1648	Chlortalidone	77-36-1	NS(=O)(=O)c1cc(ccc1Cl)C2(O)NC(=O)c3ccccc23	0
1649	Topiramate	97240-79-4	CC1(C)OC2COC3(COS(=O)(=O)N)OC(C)(C)OC3C2O1	0
1650	Papaverine	58-74-2	COc1ccc(Cc2nccc3cc(OC)c(OC)cc23)cc1OC	0
1651	xamoterol	81801-12-9	OC(CNCCNC(=O)N1CCOCC1)COc2ccc(O)cc2	0
1652	Nalmefene	55096-26-9	Oc1ccc2CC3N(CC4CC4)CCC56C(Oc1c25)C(=C)CCC36O	0
1653	(8beta)-N-(1-hydroxybutan-2-yl)-6-methyl-9,10-didehydroergoline-8-carboxamide	20313-98-8	CCC(CO)NC(=O)C1CN(C)C2Cc3c[nH]c4cccc(C2=C1)c34	0
1654	(+)-Propoxyphene	469-62-5	CCC(=O)OC(Cc1ccccc1)(C(C)CN(C)C)c2ccccc2	0
1655	Disopyramide	3737-09-5	CC(C)N(CCC(C(=O)N)(c1ccccc1)c2ccccn2)C(C)C	0
1656	Pentamidine	100-33-4	NC(=N)c1ccc(OCCCCCOc2ccc(cc2)C(=N)N)cc1	0
1657	19-Norethindrone acetate	51-98-9	CC(=O)OC1(CCC2C3CCC4=CC(=O)CCC4C3CCC12C)C#C	0
1658	Terguride	37686-84-3	CCN(CC)C(=O)NC1CC2C(Cc3c[nH]c4cccc2c34)N(C)C1	0
1659	propiomazine	362-29-8	CCC(=O)c1ccc2Sc3ccccc3N(CC(C)N(C)C)c2c1	0
1660	Naltrexone	16590-41-3	Oc1ccc2CC3N(CC4CC4)CCC56C(Oc1c25)C(=O)CCC36O	0
1661	Levosulpiride	23672-07-3	CCN1CCCC1CNC(=O)c2cc(ccc2OC)S(=O)(=O)N	0
1662	Cyclacillin	3485-14-1	CC1(C)SC2C(NC(=O)C3(N)CCCCC3)C(=O)N2C1C(=O)O	0
1663	D(+)-Sucrose	57-50-1	OCC1OC(OC2(CO)OC(CO)C(O)C2O)C(O)C(O)C1O	0
1664	Lactulose	4618-18-2	OCC1OC(OC2C(CO)OC(O)(CO)C2O)C(O)C(O)C1O	0
1665	Megestrol	3562-63-8	CC(=O)C1(O)CCC2C3C=C(C)C4=CC(=O)CCC4(C)C3CCC12C	0
1666	Triazolam	28911-01-5	Cc1nnc2CN=C(c3ccccc3Cl)c4cc(Cl)ccc4n12	0
1667	Cinchocaine	85-79-0	CCCCOc1cc(C(=O)NCCN(CC)CC)c2ccccc2n1	0
1668	dibenzothiazepine	2058-52-8	CN1CCN(CC1)C2=Nc3ccccc3Sc4ccc(Cl)cc24	0
1669	clemastine	15686-51-8	CN1CCCC1CCOC(C)(c2ccccc2)c3ccc(Cl)cc3	0
1670	arformoterol	73573-87-2	COc1ccc(CC(C)NCC(O)c2ccc(O)c(NC=O)c2)cc1	0
1671	Piketoprofen	60576-13-8	CC(C(=O)Nc1cc(C)ccn1)c2cccc(c2)C(=O)c3ccccc3	0
1672	oxyphencyclimine	125-53-1	CN1CCCN=C1COC(=O)C(O)(C2CCCCC2)c3ccccc3	0
1673	Medrysone	2668-66-8	CC1CC2C3CCC(C(=O)C)C3(C)CC(O)C2C4(C)CCC(=O)C=C14	0
1674	Testosterone propionate	57-85-2	CCC(=O)OC1CCC2C3CCC4=CC(=O)CCC4(C)C3CCC12C	0
1675	Esomeprazole	119141-88-7	COc1ccc2[nH]c(nc2c1)S(=O)Cc3ncc(C)c(OC)c3C	0
1676	Bevantolol	59170-23-9	COc1ccc(CCNCC(O)COc2cccc(C)c2)cc1OC	0
1677	4-chloro-N-[(2R,6R)-2,6-dimethylpiperidin-1-yl]-3-sulfamoylbenzamide	3563-77-7	CC1CCCC(C)N1NC(=O)c2ccc(Cl)c(c2)S(=O)(=O)N	0
1678	Nifedipine	21829-25-4	COC(=O)C1=C(C)NC(=C(C1c2ccccc2[N+](=O)[O-])C(=O)OC)C	0
1679	Beclobrate	55937-99-0	CCOC(=O)C(C)(CC)Oc1ccc(Cc2ccc(Cl)cc2)cc1	0
1680	Adenosine 5'-monophosphate	61-19-8	Nc1ncnc2c1ncn2C3OC(COP(=O)(O)O)C(O)C3O	0
1681	Cephalexin	15686-71-2	CC1=C(N2C(SC1)C(NC(=O)C(N)c3ccccc3)C2=O)C(=O)O	0
1682	Indoramin	26844-12-2	O=C(NC1CCN(CCc2c[nH]c3ccccc23)CC1)c4ccccc4	0
1683	clodantoin	5588-20-5	CCCCC(CC)C1NC(=O)N(SC(Cl)(Cl)Cl)C1=O	0
1684	(+)-Camptothecin	7689-03-4	CCC1(O)C(=O)OCC2=C1C=C3N(Cc4cc5ccccc5nc34)C2=O	0
1685	Enalaprilat	76420-72-9	CC(NC(CCc1ccccc1)C(=O)O)C(=O)N2CCCC2C(=O)O	0
1686	Torasemide	56211-40-6	CC(C)NC(=O)NS(=O)(=O)c1cnccc1Nc2cccc(C)c2	0
1687	ingenol	30220-46-3	CC1CC2C(C3C=C(CO)C(O)C4(O)C(O)C(=CC14C3=O)C)C2(C)C	0
1688	Acrivastine	87848-99-5	Cc1ccc(cc1)C(=CCN2CCCC2)c3cccc(C=CC(=O)O)n3	0
1689	alfadolone	14107-37-0	CC12CCC(O)CC1CCC3C4CCC(C(=O)CO)C4(C)CC(=O)C23	0
1690	Voriconazole	137234-62-9	CC(c1ncncc1F)C(O)(Cn2cncn2)c3ccc(F)cc3F	0
1691	cinmetacin	20168-99-4	COc1ccc2c(c1)c(CC(=O)O)c(C)n2C(=O)C=Cc3ccccc3	0
1692	(6R-(6alpha,7))-((Amino-1,4-cyclohexadien-1-ylacetyl)amino)-3-methyl-8-oxo-5-thia-1-azabicyclo[4.2.0]oct-2-ene-2-carboxylic acid	38821-53-3	CC1=C(N2C(SC1)C(NC(=O)C(N)C3=CCC=CC3)C2=O)C(=O)O	0
1693	Ampicillin	69-53-4	CC1(C)SC2C(NC(=O)C(N)c3ccccc3)C(=O)N2C1C(=O)O	0
1694	Penicillin V	87-08-1	CC1(C)SC2C(NC(=O)COc3ccccc3)C(=O)N2C1C(=O)O	0
1695	Lomefloxacin	98079-51-7	CCN1C=C(C(=O)O)C(=O)c2cc(F)c(N3CCNC(C)C3)c(F)c12	0
1696	Pirenzepine	28797-61-7	CN1CCN(CC(=O)N2c3ccccc3C(=O)Nc4cccnc24)CC1	0
1697	triflupromazine	146-54-3	CN(C)CCCN1c2ccccc2Sc3ccc(cc13)C(F)(F)F	0
1698	Prostaglandin E2	363-24-6	CCCCCC(O)C=CC1C(O)CC(=O)C1CC=CCCCC(=O)O	0
1699	benzamide, 4-methoxy-N-[2-[2-(1-methyl-2-piperidinyl)ethyl]phenyl]-	66778-36-7	COc1ccc(cc1)C(=O)Nc2ccccc2CCC3CCCCN3C	0
1700	Anileridine	144-14-9	CCOC(=O)C1(CCN(CCc2ccc(N)cc2)CC1)c3ccccc3	0
1701	halazepam	23092-17-3	FC(F)(F)CN1C(=O)CN=C(c2ccccc2)c3cc(Cl)ccc13	0
1702	(+)-Griseofulvin	126-07-8	COC1=CC(=O)CC(C)C12Oc3c(Cl)c(OC)cc(OC)c3C2=O	0
1703	acenocoumarol	152-72-7	CC(=O)CC(C1=C(O)c2ccccc2OC1=O)c3ccc(cc3)[N+](=O)[O-]	0
1704	Flosulide	80937-31-1	CS(=O)(=O)Nc1cc2CCC(=O)c2cc1Oc3ccc(F)cc3F	0
1705	methysergide	361-37-5	CCC(CO)NC(=O)C1CN(C)C2Cc3cn(C)c4cccc(C2=C1)c34	0
1706	[(3S,6S)-6-dimethylamino-4,4-diphenyl-heptan-3-yl] acetate	1477-40-3	CCC(OC(=O)C)C(CC(C)N(C)C)(c1ccccc1)c2ccccc2	0
1707	butizide	2043-38-1	CC(C)CC1Nc2cc(Cl)c(cc2S(=O)(=O)N1)S(=O)(=O)N	0
1708	(+)-5-Iodo-2'-deoxyuridine	54-42-2	OCC1OC(CC1O)N2C=C(I)C(=O)NC2=O	0
1709	Aceclofenac	89796-99-6	OC(=O)COC(=O)Cc1ccccc1Nc2c(Cl)cccc2Cl	0
1710	Valganciclovir	175865-60-8	CC(C)C(N)C(=O)OCC(CO)OCn1cnc2C(=O)N=C(N)Nc12	0
1711	5-[(2-cyclopropyl-7,8-dimethoxy-2H-chromen-5-yl)methyl]pyrimidine-2,4- diamine	192314-93-5	COc1cc(Cc2cnc(N)nc2N)c3C=CC(Oc3c1OC)C4CC4	0
1712	Vincamine	1617-90-9	CCC12CCCN3CCc4c(C13)n(c5ccccc45)C(O)(C2)C(=O)OC	0
1713	17alpha-Hydroxy-yohimban-16alpha-carboxylic acid methyl ester	146-48-5	COC(=O)C1C(O)CCC2CN3CCc4c([nH]c5ccccc45)C3CC12	0
1714	Prostaglandin E1	745-65-3	CCCCCC(O)C=CC1C(O)CC(=O)C1CCCCCCC(=O)O	0
1715	dinoprost	551-11-1	CCCCCC(O)C=CC1C(O)CC(O)C1CC=CCCCC(=O)O	0
1716	Rioprostil	77287-05-9	CCCCC(C)(O)CC=CC1C(O)CC(=O)C1CCCCCCCO	0
1717	Xipamide	14293-44-8	Cc1cccc(C)c1NC(=O)c2cc(c(Cl)cc2O)S(=O)(=O)N	0
1718	Urefibrate	38647-79-9	NC(=O)NC(=O)C(Oc1ccc(Cl)cc1)Oc2ccc(Cl)cc2	0
1719	p-2-Thiazolylsulfamoylsuccinanilic acid	116-43-8	OC(=O)CCC(=O)Nc1ccc(cc1)S(=O)(=O)Nc2nccs2	0
1720	batanopride	102670-46-2	CCN(CC)CCNC(=O)c1cc(Cl)c(N)cc1OC(C)C(=O)C	0
1721	Amodiaquine	86-42-0	CCN(CC)Cc1cc(Nc2ccnc3cc(Cl)ccc23)ccc1O	0
1722	Pipobroman	54-91-1	BrCCC(=O)N1CCN(CC1)C(=O)CCBr	0
1723	Thiamphenicol	15318-45-3	CS(=O)(=O)c1ccc(cc1)C(O)C(CO)NC(=O)C(Cl)Cl	0
1724	Sulindac	38194-50-2	CC1=C(CC(=O)O)c2cc(F)ccc2C1=Cc3ccc(cc3)S(=O)C	0
1725	Pioglitazone	111025-46-8	CCc1ccc(CCOc2ccc(CC3SC(=O)NC3=O)cc2)nc1	0
1726	1-[[2-(Diethylamino)ethyl]amino]-4-(hydroxymethyl)thioxanthen-9-one	3105-97-3	CCN(CC)CCNc1ccc(CO)c2Sc3ccccc3C(=O)c12	0
1727	Estradiol valerate	979-32-8	CCCCC(=O)OC1CCC2C3CCc4cc(O)ccc4C3CCC12C	0
1728	dopexamine	86197-47-9	Oc1ccc(CCNCCCCCCNCCc2ccccc2)cc1O	0
1729	Balsalazide	80573-04-2	OC(=O)CCNC(=O)c1ccc(cc1)N=Nc2ccc(O)c(c2)C(=O)O	0
1730	Droxicam	90101-16-9	CN1C2=C(OC(=O)N(C2=O)c3ccccn3)c4ccccc4S1(=O)=O	0
1731	tolrestat	82964-04-3	COc1ccc2c(cccc2c1C(F)(F)F)C(=S)N(C)CC(=O)O	0
1732	cinacalcet	226256-56-0	CC(NCCCc1cccc(c1)C(F)(F)F)c2cccc3ccccc23	0
1733	Rosiglitazone	122320-73-4	CN(CCOc1ccc(CC2SC(=O)NC2=O)cc1)c3ccccn3	0
1734	nalbuphine	20594-83-6	OC1CCC2(O)C3Cc4ccc(O)c5OC1C2(CCN3CC6CCC6)c45	0
1735	Oxybutynin	5633-20-5	CCN(CC)CC#CCOC(=O)C(O)(C1CCCCC1)c2ccccc2	0
1736	clometacin	25803-14-9	COc1ccc2c(C(=O)c3ccc(Cl)cc3)c(C)n(CC(=O)O)c2c1	0
1737	Bendamustine	16506-27-7	Cn1c(CCCC(=O)O)nc2cc(ccc12)N(CCCl)CCCl	0
1738	Prednisone	53-03-2	CC12CC(=O)C3C(CCC4=CC(=O)C=CC34C)C1CCC2(O)C(=O)CO	0
1739	Cilastatin	82009-34-5	CC1(C)CC1C(=O)NC(=CCCCCSCC(N)C(=O)O)C(=O)O	0
1740	Grepafloxacin	119914-60-2	CC1CN(CCN1)c2cc3N(C=C(C(=O)O)C(=O)c3c(C)c2F)C4CC4	0
1741	(E)-4-(2-(6-(2-(2-(2-(fluoro-18F)ethoxy)ethoxy)ethoxy)pyridin-3-yl)vinyl)-N-methylaniline	956103-76-7	CNc1ccc(C=Cc2ccc(OCCOCCOCC[18F])nc2)cc1	0
1742	Cyclomethycaine	139-62-8	CC1CCCCN1CCCOC(=O)c2ccc(OC3CCCCC3)cc2	0
1743	Methyclothiazide	135-07-9	CN1C(CCl)Nc2cc(Cl)c(cc2S1(=O)=O)S(=O)(=O)N	0
1744	Nitrendipine	39562-70-4	CCOC(=O)C1=C(C)NC(=C(C1c2cccc(c2)[N+](=O)[O-])C(=O)OC)C	0
1745	Cortisone	53-06-5	CC12CCC(=O)C=C1CCC3C4CCC(O)(C(=O)CO)C4(C)CC(=O)C23	0
1746	iloprost	78919-13-8	CC#CCC(C)C(O)C=CC1C(O)CC2CC(=CCCCC(=O)O)CC12	0
1747	Bisacodyl	603-50-9	CC(=O)Oc1ccc(cc1)C(c2ccc(OC(=O)C)cc2)c3ccccn3	0
1748	Bezafibrate	41859-67-0	CC(C)(Oc1ccc(CCNC(=O)c2ccc(Cl)cc2)cc1)C(=O)O	0
1749	Caffeine Citrate	93390-81-9	OP(=O)(O)OCN1C(=O)NC(C1=O)(c2ccccc2)c3ccccc3	0
1750	L-pyroglutamyl-L-histidyl-L-prolinamide	24305-27-9	NC(=O)C1CCCN1C(=O)C(Cc2c[nH]cn2)NC(=O)C3CCC(=O)N3	0
1751	Piretanide	55837-27-9	NS(=O)(=O)c1cc(cc(N2CCCC2)c1Oc3ccccc3)C(=O)O	0
1752	Picafibrate	57548-79-5	CC(C)(Oc1ccc(Cl)cc1)C(=O)OCCNC(=O)c2cccnc2	0
1753	mexazolam	31868-18-5	CC1COC2(N1CC(=O)Nc3ccc(Cl)cc23)c4ccccc4Cl	0
1754	cefadroxil	50370-12-2	CC1=C(N2C(SC1)C(NC(=O)C(N)c3ccc(O)cc3)C2=O)C(=O)O	0
1755	Etofibrate	31637-97-5	CC(C)(Oc1ccc(Cl)cc1)C(=O)OCCOC(=O)c2cccnc2	0
1756	Bumetanide	28395-03-1	CCCCNc1cc(cc(c1Oc2ccccc2)S(=O)(=O)N)C(=O)O	0
1757	pheneticillin	147-55-7	CC(Oc1ccccc1)C(=O)NC2C3SC(C)(C)C(N3C2=O)C(=O)O	0
1758	tribuzone	13221-27-7	CC(C)(C)C(=O)CCC1C(=O)N(N(C1=O)c2ccccc2)c3ccccc3	0
1759	Ciprostene	81845-44-5	CCCCCC(O)C=CC1C(O)CC2(C)CC(=CCCCC(=O)O)CC12	0
1760	Quinestrol	152-43-2	CC12CCC3C(CCc4cc(OC5CCCC5)ccc34)C1CCC2(O)C#C	0
1761	Amoxicillin	26787-78-0	CC1(C)SC2C(NC(=O)C(N)c3ccc(O)cc3)C(=O)N2C1C(=O)O	0
1762	Timegadine	71079-19-1	Cc1cc(N=C(NC2CCCCC2)Nc3nccs3)c4ccccc4n1	0
1763	Clinafloxacin	105956-97-6	NC1CCN(C1)c2c(F)cc3C(=O)C(=CN(C4CC4)c3c2Cl)C(=O)O	0
1764	Metolazone	17560-51-9	CC1Nc2cc(Cl)c(cc2C(=O)N1c3ccccc3C)S(=O)(=O)N	0
1765	Indapamide	26807-65-8	CC1Cc2ccccc2N1NC(=O)c3ccc(Cl)c(c3)S(=O)(=O)N	0
1766	4-[[4-[[4-[(E)-2-cyanoethenyl]-2,6-dimethyl-phenyl]amino]pyrimidin-2-yl]amino]benzonitrile	500287-72-9	Cc1cc(C=CC#N)cc(C)c1Nc2ccnc(Nc3ccc(cc3)C#N)n2	0
1767	Glibornuride	26944-48-9	Cc1ccc(cc1)S(=O)(=O)NC(=O)NC2C(O)C3(C)CCC2C3(C)C	0
1768	15(R)-15-methyl Prostaglandin E2	55028-70-1	CCCCCC(C)(O)C=CC1C(O)CC(=O)C1CC=CCCCC(=O)O	0
1769	Drospirenone	67392-87-4	CC12CCC(=O)C=C1C3CC3C4C2CCC5(C)C4C6CC6C57CCC(=O)O7	0
1770	bepridil	64706-54-3	CC(C)COCC(CN(Cc1ccccc1)c2ccccc2)N3CCCC3	0
1771	Atovaquone	95233-18-4	OC1=C(C2CCC(CC2)c3ccc(Cl)cc3)C(=O)c4ccccc4C1=O	0
1772	Ponfibrate	53341-49-4	CCOC(=O)C1Oc2ccc(Cl)cc2C(C)c3cc(Cl)ccc3O1	0
1773	Bambuterol	81732-65-2	CN(C)C(=O)Oc1cc(OC(=O)N(C)C)cc(c1)C(O)CNC(C)(C)C	0
1774	Conorfone	72060-05-0	CCC1CC(=O)C2Oc3c(OC)ccc4CC5C1C2(CCN5CC6CC6)c34	0
1775	(1-Methyl-4-piperidyl) 2,2-diphenyl-2-propoxy-acetate	60569-19-9	CCCOC(C(=O)OC1CCN(C)CC1)(c2ccccc2)c3ccccc3	0
1776	Cefaclor	53994-73-3	NC(C(=O)NC1C2SCC(=C(N2C1=O)C(=O)O)Cl)c3ccccc3	0
1777	Prucalopride	179474-81-8	COCCCN1CCC(CC1)NC(=O)c2cc(Cl)c(N)c3CCOc23	0
1778	Diacerein	13739-02-1	CC(=O)Oc1cccc2C(=O)c3cc(cc(OC(=O)C)c3C(=O)c12)C(=O)O	0
1779	Perindopril	82834-16-0	CCCC(NC(C)C(=O)N1C2CCCCC2CC1C(=O)O)C(=O)OCC	0
1780	Pentamorphone	68616-83-1	CCCCCNC12C=CC(=O)C3Oc4c(O)ccc5CC1N(C)CCC23c45	0
1781	Pyritinol	1098-97-1	Cc1ncc(CSSCc2cnc(C)c(O)c2CO)c(CO)c1O	0
1782	Carboprost	35700-23-3	CCCCCC(C)(O)C=CC1C(O)CC(O)C1CC=CCCCC(=O)O	0
1783	Stugeron	298-57-7	C(C=Cc1ccccc1)N2CCN(CC2)C(c3ccccc3)c4ccccc4	0
1784	Etofenamate	30544-47-9	OCCOCCOC(=O)c1ccccc1Nc2cccc(c2)C(F)(F)F	0
1785	Trimetrexate	52128-35-5	COc1cc(NCc2ccc3nc(N)nc(N)c3c2C)cc(OC)c1OC	0
1786	Cilostazol	73963-72-1	O=C1CCc2cc(OCCCCc3nnnn3C4CCCCC4)ccc2N1	0
1787	Amisulpride	71675-85-9	CCN1CCCC1CNC(=O)c2cc(c(N)cc2OC)S(=O)(=O)CC	0
1788	N-[4-(5-methyl-3-phenyl-oxazol-4-yl)phenyl]sulfonylpropanamide	198470-84-7	CCC(=O)NS(=O)(=O)c1ccc(cc1)c2c(C)onc2c3ccccc3	0
1789	telenzepine	80880-90-6	CN1CCN(CC(=O)N2c3ccccc3NC(=O)c4csc(C)c24)CC1	0
1790	Nomegestrol 17-acetate	58652-20-3	CC(=O)OC1(CCC2C3C=C(C)C4=CC(=O)CCC4C3CCC12C)C(=O)C	0
1791	Thioridazine	50-52-2	CSc1ccc2Sc3ccccc3N(CCC4CCCCN4C)c2c1	0
1792	Lorcainide	59729-31-6	CC(C)N1CCC(CC1)N(C(=O)Cc2ccccc2)c3ccc(Cl)cc3	0
1793	Isradipine	75695-93-1	COC(=O)C1=C(C)NC(=C(C1c2cccc3nonc23)C(=O)OC(C)C)C	0
1794	Tamoxifen	10540-29-1	CCC(=C(c1ccccc1)c2ccc(OCCN(C)C)cc2)c3ccccc3	0
1795	Lornoxicam	70374-39-9	CN1C(=C(O)c2sc(Cl)cc2S1(=O)=O)C(=O)Nc3ccccn3	0
1796	Trazodone	19794-93-5	Clc1cccc(c1)N2CCN(CCCN3N=C4C=CC=CN4C3=O)CC2	0
1797	Meprednisone	1247-42-3	CC1CC2C3CCC4=CC(=O)C=CC4(C)C3C(=O)CC2(C)C1(O)C(=O)CO	0
1798	Finasteride	98319-26-7	CC(C)(C)NC(=O)C1CCC2C3CCC4NC(=O)C=CC4(C)C3CCC12C	0
1799	Glafenine	3820-67-5	OCC(O)COC(=O)c1ccccc1Nc2ccnc3cc(Cl)ccc23	0
1800	oxametacin	27035-30-9	COc1ccc2c(c1)c(CC(=O)NO)c(C)n2C(=O)c3ccc(Cl)cc3	0
1801	Deferasirox	201530-41-8	OC(=O)c1ccc(cc1)n2nc(nc2c3ccccc3O)c4ccccc4O	0
1802	Serfibrate	54657-98-6	CC(=O)NC(CCSC(=O)C(C)(C)Oc1ccc(Cl)cc1)C(=O)O	0
1803	Prochlorperazine	58-38-8	CN1CCN(CCCN2c3ccccc3Sc4ccc(Cl)cc24)CC1	0
1804	cicaprost	95722-07-9	CCC#CCC(C)C(O)C#CC1C(O)CC2CC(=CCOCC(=O)O)CC12	0
1805	Cyproterone	2098-66-0	CC(=O)C1(O)CCC2C3C=C(Cl)C4=CC(=O)C5CC5C4(C)C3CCC12C	0
1806	hydroxyzine	68-88-2	OCCOCCN1CCN(CC1)C(c2ccccc2)c3ccc(Cl)cc3	0
1807	Tiagabine	115103-54-3	Cc1ccsc1C(=CCCN2CCCC(C2)C(=O)O)c3sccc3C	0
1808	Haloperidol	52-86-8	OC1(CCN(CCCC(=O)c2ccc(F)cc2)CC1)c3ccc(Cl)cc3	0
1809	bromhexine	3572-43-8	CN(Cc1cc(Br)cc(Br)c1N)C2CCCCC2	0
1810	Lidorestat	245116-90-9	OC(=O)Cn1cc(Cc2nc3c(F)c(F)cc(F)c3s2)c4ccccc14	0
1811	Riboflavin	83-88-5	Cc1cc2N=C3C(=O)NC(=O)N=C3N(CC(O)C(O)C(O)CO)c2cc1C	0
1812	Enalapril	75847-73-3	CCOC(=O)C(CCc1ccccc1)NC(C)C(=O)N2CCCC2C(=O)O	0
1813	remifentanil	132875-61-7	CCC(=O)N(c1ccccc1)C2(CCN(CCC(=O)OC)CC2)C(=O)OC	0
1814	Desoximetasone	382-67-2	CC1CC2C3CCC4=CC(=O)C=CC4(C)C3(F)C(O)CC2(C)C1C(=O)CO	0
1815	Ronifibrate	42597-57-9	CC(C)(Oc1ccc(Cl)cc1)C(=O)OCCCOC(=O)c2cccnc2	0
1816	carbenicillin	4697-36-3	CC1(C)SC2C(NC(=O)C(C(=O)O)c3ccccc3)C(=O)N2C1C(=O)O	0
1817	Ambrisentan	177036-94-1	COC(C(Oc1nc(C)cc(C)n1)C(=O)O)(c2ccccc2)c3ccccc3	0
1818	Fluprednisolone	53-34-9	CC12CC(O)C3C(CC(F)C4=CC(=O)C=CC34C)C1CCC2(O)C(=O)CO	0
1819	Doxapram	309-29-5	CCN1CC(CCN2CCOCC2)C(C1=O)(c3ccccc3)c4ccccc4	0
1820	Trimoprostil	69900-72-7	CCCCC(C)(C)C(O)C=CC1C(C)CC(=O)C1CC=CCCCC(=O)O	0
1821	7-[(1R,2R,3R)-3-hydroxy-2-[(3R)-3-hydroxy-4,4-dimethyloct-1-en-1-yl]-5-methylidenecyclopentyl]hept-5-enoic acid	61263-35-2	CCCCC(C)(C)C(O)C=CC1C(O)CC(=C)C1CC=CCCCC(=O)O	0
1822	droperidol	548-73-2	Fc1ccc(cc1)C(=O)CCCN2CCC(=CC2)N3C(=O)Nc4ccccc34	0
1823	2-[(1-Benzyl-4-piperidyl)methyl]-5,6-dimethoxy-2,3-dihydroinden-1-one	120014-06-4	COc1cc2CC(CC3CCN(Cc4ccccc4)CC3)C(=O)c2cc1OC	0
1824	Celiprolol	56980-93-9	CCN(CC)C(=O)Nc1ccc(OCC(O)CNC(C)(C)C)c(c1)C(=O)C	0
1825	Cyclopenthiazide	742-20-1	NS(=O)(=O)c1cc2c(NC(CC3CCCC3)NS2(=O)=O)cc1Cl	0
1826	methicillin	61-32-5	COc1cccc(OC)c1C(=O)NC2C3SC(C)(C)C(N3C2=O)C(=O)O	0
1827	Fludrocortisone	127-31-1	CC12CC(O)C3(F)C(CCC4=CC(=O)CCC34C)C1CCC2(O)C(=O)CO	0
1828	Prostalene	54120-61-5	CCCCCC(C)(O)C=CC1C(O)CC(O)C1CC=C=CCCC(=O)OC	0
1829	Enisoprost	81026-63-3	CCCCC(C)(O)CC=CC1C(O)CC(=O)C1CCC=CCCC(=O)OC	0
1830	Limaprost	74397-12-9	CCCCC(C)CC(O)C=CC1C(O)CC(=O)C1CCCCC=CC(=O)O	0
1831	trichlormethiazide	133-67-5	NS(=O)(=O)c1cc2c(NC(NS2(=O)=O)C(Cl)Cl)cc1Cl	0
1832	Chlorotrianisene	569-57-3	COc1ccc(cc1)C(=C(c2ccc(OC)cc2)c3ccc(OC)cc3)Cl	0
1833	Celecoxib	169590-42-5	Cc1ccc(cc1)c2cc(nn2c3ccc(cc3)S(=O)(=O)N)C(F)(F)F	0
1834	Econazole	27220-47-9	Clc1ccc(COC(Cn2ccnc2)c3ccc(Cl)cc3Cl)cc1	0
1835	mebutizide	3568-00-1	CCC(C)C(C)C1Nc2cc(Cl)c(cc2S(=O)(=O)N1)S(=O)(=O)N	0
1836	Tetrofosmin	127502-06-1	CCOCCP(CCOCC)CCP(CCOCC)CCOCC	0
1837	Eletriptan	143322-58-1	CN1CCCC1Cc2c[nH]c3ccc(CCS(=O)(=O)c4ccccc4)cc23	0
1838	Misoprostol	59122-46-2	CCCCC(C)(O)CC=CC1C(O)CC(=O)C1CCCCCCC(=O)OC	0
1839	Loratadine	79794-75-5	CCOC(=O)N1CCC(=C2c3ccc(Cl)cc3CCc4cccnc24)CC1	0
1840	Pantoprazole	102625-70-7	COc1ccnc(CS(=O)c2nc3cc(OC(F)F)ccc3[nH]2)c1OC	0
1841	Prazosin	19216-56-9	COc1cc2nc(nc(N)c2cc1OC)N3CCN(CC3)C(=O)c4occc4	0
1842	Ceftizoxime	68401-81-0	CON=C(C(=O)NC1C2SCC=C(N2C1=O)C(=O)O)c3csc(N)n3	0
1843	meropenem	96036-03-2	CC(O)C1C2C(C)C(=C(N2C1=O)C(=O)O)SC3CNC(C3)C(=O)N(C)C	0
1844	quetiapine	111974-69-7	OCCOCCN1CCN(CC1)C2=Nc3ccccc3Sc4ccccc24	0
1845	Nafronyl	31329-57-4	CCN(CC)CCOC(=O)C(CC1CCCO1)Cc2cccc3ccccc23	0
1846	Althiazide	5588-16-9	NS(=O)(=O)c1cc2c(NC(CSCC=C)NS2(=O)=O)cc1Cl	0
1847	Bortezomib	179324-69-7	CC(C)CC(NC(=O)C(Cc1ccccc1)NC(=O)c2cnccn2)B(O)O	0
1848	Felodipine	72509-76-3	CCOC(=O)C1=C(C)NC(=C(C1c2cccc(Cl)c2Cl)C(=O)OC)C	0
1849	Artesunate	88495-63-0	CC1CCC2C(C)C(OC(=O)CCC(=O)O)OC3OC4(C)CCC1C23OO4	0
1850	Ticarcillin	34787-01-4	CC1(C)SC2C(NC(=O)C(C(=O)O)c3ccsc3)C(=O)N2C1C(=O)O	0
1851	Megestrol acetate	595-33-5	CC(=O)OC1(CCC2C3C=C(C)C4=CC(=O)CCC4(C)C3CCC12C)C(=O)C	0
1852	beta-Estradiol 3,17-dipropionate	113-38-2	CCC(=O)OC1CCC2C3CCc4cc(OC(=O)CC)ccc4C3CCC12C	0
1853	Ethynodiol diacetate	297-76-7	CC(=O)OC1CCC2C3CCC4(C)C(CCC4(OC(=O)C)C#C)C3CCC2=C1	0
1854	ibutilide	122647-31-8	CCCCCCCN(CC)CCCC(O)c1ccc(NS(=O)(=O)C)cc1	0
1855	vitamin D	1406-16-2	CC(C)CCCC(C)C1CCC2C(=CC=C3CC(O)CCC3=C)CCCC12C	0
1856	Buspirone	36505-84-7	O=C1CC2(CCCC2)CC(=O)N1CCCCN3CCN(CC3)c4ncccn4	0
1857	Axitinib	319460-85-0	CNC(=O)c1ccccc1Sc2ccc3c(C=Cc4ccccn4)n[nH]c3c2	0
1858	anecortave	7753-60-8	CC(=O)OCC(=O)C1(O)CCC2C3CCC4=CC(=O)CCC4(C)C3=CCC12C	0
1859	Dalvastatin	132100-55-1	Cc1cc(ccc1F)C2=C(C=CC3CC(O)CC(=O)O3)C(C)(C)CC(C)(C)C2	0
1860	Medroxyprogesterone 17-acetate	71-58-9	CC1CC2C(CCC3(C)C2CCC3(OC(=O)C)C(=O)C)C4(C)CCC(=O)C=C14	0
1861	Sufentanil	56030-54-7	CCC(=O)N(c1ccccc1)C2(COC)CCN(CCc3cccs3)CC2	0
1862	mesoridazine	5588-33-0	CN1CCCCC1CCN2c3ccccc3Sc4ccc(cc24)S(=O)C	0
1863	7-chloro-5-(2-fluorophenyl)-1,3-dihydro-1-(2,2,2-trifluoroethyl)-2H-1,4-Benzodiazepine-2-thione	36735-22-5	Fc1ccccc1C2=NCC(=S)N(CC(F)(F)F)c3ccc(Cl)cc23	0
1864	Terazosin	63590-64-7	COc1cc2nc(nc(N)c2cc1OC)N3CCN(CC3)C(=O)C4CCCO4	0
1865	Gusperimus	104317-84-2	NCCCNCCCCNC(=O)C(O)NC(=O)CCCCCCNC(=N)N	0
1866	Vagistat	65899-73-2	Clc1ccc(C(Cn2ccnc2)OCc3ccsc3Cl)c(Cl)c1	0
1867	benzylhydrochlorothiazide	1824-50-6	NS(=O)(=O)c1cc2c(NC(Cc3ccccc3)NS2(=O)=O)cc1Cl	0
1868	Trimethobenzamide	138-56-7	COc1cc(cc(OC)c1OC)C(=O)NCc2ccc(OCCN(C)C)cc2	0
1869	Eszopiclone	138729-47-2	CN1CCN(CC1)C(=O)OC2N(C(=O)c3nccnc23)c4ccc(Cl)cn4	0
1870	Levocetirizine	130018-77-8	OC(=O)COCCN1CCN(CC1)C(c2ccccc2)c3ccc(Cl)cc3	0
1871	Gemifioxacin	175463-14-6	CON=C1CN(CC1CN)c2nc3N(C=C(C(=O)O)C(=O)c3cc2F)C4CC4	0
1872	Cefprozil	92665-29-7	CC=CC1=C(N2C(SC1)C(NC(=O)C(N)c3ccc(O)cc3)C2=O)C(=O)O	0
1873	Alfuzosin	81403-80-7	COc1cc2nc(nc(N)c2cc1OC)N(C)CCCNC(=O)C3CCCO3	0
1874	hetacillin	3511-16-8	CC1(C)SC2C(N3C(=O)C(NC3(C)C)c4ccccc4)C(=O)N2C1C(=O)O	0
1875	cyclothiazide	2259-96-3	NS(=O)(=O)c1cc2c(NC(NS2(=O)=O)C3CC4CC3C=C4)cc1Cl	0
1876	regadenoson	313348-27-5	CNC(=O)c1cnn(c1)c2nc(N)c3ncn(C4OC(CO)C(O)C4O)c3n2	0
1877	Lubiprostone	136790-76-6	CCCCC(F)(F)C1(O)CCC2C(CCCCCCC(=O)O)C(=O)CC2O1	0
1878	Mevastatin	73573-88-3	CCC(C)C(=O)OC1CCC=C2C=CC(C)C(CCC3CC(O)CC(=O)O3)C12	0
1879	Treprostinil	81846-19-7	CCCCCC(O)CCC1C(O)CC2Cc3c(CC12)cccc3OCC(=O)O	0
1880	Meclozine	569-65-3	Cc1cccc(CN2CCN(CC2)C(c3ccccc3)c4ccc(Cl)cc4)c1	0
1881	ponalrestat	72702-95-5	OC(=O)CC1=NN(Cc2ccc(Br)cc2F)C(=O)c3ccccc13	0
1882	flavoxate	15301-69-6	CC1=C(Oc2c(cccc2C1=O)C(=O)OCCN3CCCCC3)c4ccccc4	0
1883	Abiraterone acetate	154229-18-2	CC(=O)OC1CCC2(C)C3CCC4(C)C(CC=C4c5cccnc5)C3CC=C2C1	0
1884	Sparfloxacin	110871-86-8	CC1CN(CC(C)N1)c2c(F)c(N)c3C(=O)C(=CN(C4CC4)c3c2F)C(=O)O	0
1885	Dexamethasone	50-02-2	CC1CC2C3CCC4=CC(=O)C=CC4(C)C3(F)C(O)CC2(C)C1(O)C(=O)CO	0
1886	ivacaftor	873054-44-5	CC(C)(C)c1cc(c(NC(=O)C2=CNc3ccccc3C2=O)cc1O)C(C)(C)C	0
1887	5-[2-(5,6-diethyl-2,3-dihydro-1H-inden-2-ylamino)-(1R)-hydroxyethyl]-8-hydroxyquinolin-2(1H)-one	312753-06-3	CCc1cc2CC(Cc2cc1CC)NCC(O)c3ccc(O)c4NC(=O)C=Cc34	0
1888	Viprostol	73647-73-1	CCCCC(O)(CC=CC1C(O)CC(=O)C1CC=CCCCC(=O)OC)C=C	0
1889	Ursodeoxycholic acid	128-13-2	CC(CCC(=O)O)C1CCC2C3C(O)CC4CC(O)CCC4(C)C3CCC12C	0
1890	Diethylenetriaminepentaacetic acid	67-43-6	OC(=O)CN(CCN(CC(=O)O)CC(=O)O)CCN(CC(=O)O)CC(=O)O	0
1891	Rubitecan	91421-42-0	CCC1(O)C(=O)OCC2=C1C=C3N(Cc4cc5c(cccc5nc34)[N+](=O)[O-])C2=O	0
1892	Amsacrine	51264-14-3	COc1cc(NS(=O)(=O)C)ccc1Nc2c3ccccc3nc4ccccc24	0
1893	Brotizolam	57801-81-7	Cc1nnc2CN=C(c3ccccc3Cl)c4cc(Br)sc4n12	0
1894	Iodoform	75-47-8	IC(I)I	0
1895	gemeprost	64318-79-2	CCCCC(C)(C)C(O)C=CC1C(O)CC(=O)C1CCCCC=CC(=O)OC	0
1896	Morniflumate	65847-85-0	FC(F)(F)c1cccc(Nc2ncccc2C(=O)OCCN3CCOCC3)c1	0
1897	Cefdinir	91832-40-5	Nc1nc(cs1)C(=NO)C(=O)NC2C3SCC(=C(N3C2=O)C(=O)O)C=C	0
1898	Ketanserin	74050-98-9	Fc1ccc(cc1)C(=O)C2CCN(CCN3C(=O)Nc4ccccc4C3=O)CC2	0
1899	vesnarinone	81840-15-5	COc1ccc(cc1OC)C(=O)N2CCN(CC2)c3ccc4NC(=O)CCc4c3	0
1900	Quinagolide	87056-78-8	CCCN1CC(CC2Cc3c(O)cccc3CC12)NS(=O)(=O)N(CC)CC	0
1901	cephalothin	153-61-7	CC(=O)OCC1=C(N2C(SC1)C(NC(=O)Cc3cccs3)C2=O)C(=O)O	0
1902	Tiaprost	71116-82-0	OC(COc1ccsc1)C=CC2C(O)CC(O)C2CC=CCCCC(=O)O	0
1903	Mirabegron	223673-61-8	Nc1nc(CC(=O)Nc2ccc(CCNCC(O)c3ccccc3)cc2)cs1	0
1904	Depofemin	313-06-4	CC12CCC3C(CCc4cc(O)ccc34)C1CCC2OC(=O)CCC5CCCC5	0
1905	5,7-Diiodo-8-quinolinol	83-73-8	Oc1c(I)cc(I)c2cccnc12	0
1906	Cefetamet hydrochloride	65052-63-3	CON=C(C(=O)NC1C2SCC(=C(N2C1=O)C(=O)O)C)c3csc(N)n3	0
1907	Diperodon	101-08-6	O=C(Nc1ccccc1)OCC(CN2CCCCC2)OC(=O)Nc3ccccc3	0
1908	Salicylazosulfapyridine	599-79-1	OC(=O)c1cc(ccc1O)N=Nc2ccc(cc2)S(=O)(=O)Nc3ccccn3	0
1909	Sunitinib	557795-19-4	CCN(CC)CCNC(=O)c1c(C)[nH]c(C=C2C(=O)Nc3ccc(F)cc23)c1C	0
1910	Beraprost	88430-50-6	CC#CCC(C)C(O)C=CC1C(O)CC2Oc3c(CCCC(=O)O)cccc3C12	0
1911	dihydrotachysterol	67-96-9	CC(C)C(C)C=CC(C)C1CCC2C(=CC=C3CC(O)CCC3C)CCCC12C	0
1912	Colchicine	64-86-8	COC1=CC=C2C(=CC1=O)C(CCc3cc(OC)c(OC)c(OC)c23)NC(=O)C	0
1913	thiethylperazine	1420-55-9	CCSc1ccc2Sc3ccccc3N(CCCN4CCN(C)CC4)c2c1	0
1914	quinacrine	83-89-6	CCN(CC)CCCC(C)Nc1c2ccc(Cl)cc2nc3ccc(OC)cc13	0
1915	Enprostil	73121-56-9	COC(=O)CCC=C=CCC1C(C=CC(O)COc2ccccc2)C(O)CC1=O	0
1916	Testosterone enanthate	315-37-7	CCCCCCC(=O)OC1CCC2C3CCC4=CC(=O)CCC4(C)C3CCC12C	0
1917	Calcifediol	19356-17-3	CC(CCCC(C)(C)O)C1CCC2C(=CC=C3CC(O)CCC3=C)CCCC12C	0
1918	Zuclopenthixol	53772-83-1	OCCN1CCN(CCC=C2c3ccccc3Sc4ccc(Cl)cc24)CC1	0
1919	Nocloprost	79360-43-3	CCCCC(C)(C)C(O)C=CC1C(O)CC(Cl)C1CC=CCCCC(=O)O	0
1920	penflutizide	1766-91-2	CCCCCC1Nc2cc(c(cc2S(=O)(=O)N1)S(=O)(=O)N)C(F)(F)F	0
1921	oxacillin	66-79-5	Cc1onc(c2ccccc2)c1C(=O)NC3C4SC(C)(C)C(N4C3=O)C(=O)O	0
1922	bemetizide	1824-52-8	CC(C1Nc2cc(Cl)c(cc2S(=O)(=O)N1)S(=O)(=O)N)c3ccccc3	0
1923	fenprostalene	69381-94-8	COC(=O)CCC=C=CCC1C(O)CC(O)C1C=CC(O)COc2ccccc2	0
1924	lorajmine	47562-08-3	CCC1C(O)N2C3CC45C(OC(=O)CCl)C3C1CC2C4N(C)c6ccccc56	0
1925	Roflumilast	162401-32-3	FC(F)Oc1ccc(cc1OCC2CC2)C(=O)Nc3c(Cl)cncc3Cl	0
1926	Phthalylsulfathiazole	85-73-4	OC(=O)c1ccccc1C(=O)Nc2ccc(cc2)S(=O)(=O)Nc3nccs3	0
1927	Perphenazine	58-39-9	OCCN1CCN(CCCN2c3ccccc3Sc4ccc(Cl)cc24)CC1	0
1928	Alpidem	82626-01-5	CCCN(CCC)C(=O)Cc1c(nc2ccc(Cl)cn12)c3ccc(Cl)cc3	0
1929	tosufloxacin	100490-36-6	NC1CCN(C1)c2nc3N(C=C(C(=O)O)C(=O)c3cc2F)c4ccc(F)cc4F	0
1930	abecarnil	111841-85-1	COCc1c(ncc2[nH]c3ccc(OCc4ccccc4)cc3c12)C(=O)OC(C)C	0
1931	1,2-diphenyl-4-(2-(phenylsulfinyl)ethyl)pyrazolidine-3,5-dione	57-96-5	O=C1C(CCS(=O)c2ccccc2)C(=O)N(N1c3ccccc3)c4ccccc4	0
1932	sulfoxone	144-76-3	OS(=O)CNc1ccc(cc1)S(=O)(=O)c2ccc(NCS(=O)O)cc2	0
1933	Flunarizine	52468-60-7	Fc1ccc(cc1)C(N2CCN(CC=Cc3ccccc3)CC2)c4ccc(F)cc4	0
1934	Benzquinamid	63-12-7	CCN(CC)C(=O)C1CN2CCc3cc(OC)c(OC)cc3C2CC1OC(=O)C	0
1935	cefaloglycin	3577-01-3	CC(=O)OCC1=C(N2C(SC1)C(NC(=O)C(N)c3ccccc3)C2=O)C(=O)O	0
1936	Nebivolol	99200-09-6	OC(CNCC(O)C1CCc2cc(F)ccc2O1)C3CCc4cc(F)ccc4O3	0
1937	Imidapril	89371-37-9	CCOC(=O)C(CCc1ccccc1)NC(C)C(=O)N2C(CN(C)C2=O)C(=O)O	0
1938	Lisinopril	76547-98-3	NCCCCC(NC(CCc1ccccc1)C(=O)O)C(=O)N2CCCC2C(=O)O	0
1939	paraflutizide	1580-83-2	NS(=O)(=O)c1cc2c(NC(Cc3ccc(F)cc3)NS2(=O)=O)cc1Cl	0
1940	Toremifene	89778-26-7	CN(C)CCOc1ccc(cc1)C(=C(CCCl)c2ccccc2)c3ccccc3	0
1941	Clomifene	911-45-5	CCN(CC)CCOc1ccc(cc1)C(=C(Cl)c2ccccc2)c3ccccc3	0
1942	floctafenine	23779-99-9	OCC(O)COC(=O)c1ccccc1Nc2ccnc3c(cccc23)C(F)(F)F	0
1943	Lincomycin	154-21-2	CCCC1CC(N(C)C1)C(=O)NC(C(C)O)C2OC(SC)C(O)C(O)C2O	0
1944	alfaprostol	74176-31-1	COC(=O)CCCC=CCC1C(O)CC(O)C1C#CC(O)CCC2CCCCC2	0
1945	Sitagliptin	486460-32-6	NC(CC(=O)N1CCn2c(C1)nnc2C(F)(F)F)Cc3cc(F)c(F)cc3F	0
1946	Trifluoperazine	117-89-5	CN1CCN(CCCN2c3ccccc3Sc4ccc(cc24)C(F)(F)F)CC1	0
1947	Ethyl Biscoumacetate	548-00-5	CCOC(=O)C(C1=C(O)c2ccccc2OC1=O)C3=C(O)c4ccccc4OC3=O	0
1948	Tamsulosin	106133-20-4	CCOc1ccccc1OCCNC(C)Cc2ccc(OC)c(c2)S(=O)(=O)N	0
1949	Amlodipine	88150-42-9	CCOC(=O)C1=C(COCCN)NC(=C(C1c2ccccc2Cl)C(=O)OC)C	0
1950	Ezetimibe	163222-33-1	OC(CCC1C(N(C1=O)c2ccc(F)cc2)c3ccc(O)cc3)c4ccc(F)cc4	0
1951	Sitafloxacin	127254-12-0	NC1CN(CC12CC2)c3c(F)cc4C(=O)C(=CN(C5CC5F)c4c3Cl)C(=O)O	0
1952	Biclofibrate	54063-27-3	CN1CCCC1COC(=O)C(Oc2ccc(Cl)cc2)Oc3ccc(Cl)cc3	0
1953	lifibrate	22204-91-7	CN1CCC(CC1)OC(=O)C(Oc2ccc(Cl)cc2)Oc3ccc(Cl)cc3	0
1954	Ceftibuten	97519-39-6	Nc1nc(cs1)C(=CCC(=O)O)C(=O)NC2C3SCC=C(N3C2=O)C(=O)O	0
1955	Diflorasone	2557-49-5	CC1CC2C3CC(F)C4=CC(=O)C=CC4(C)C3(F)C(O)CC2(C)C1(O)C(=O)CO	0
1956	Risperidone	106266-06-2	CC1=C(CCN2CCC(CC2)c3noc4cc(F)ccc34)C(=O)N5CCCCC5=N1	0
1957	Ornoprostil	70667-26-4	CCCCC(C)CC(O)C=CC1C(O)CC(=O)C1CC(=O)CCCCC(=O)OC	0
1958	quide	3819-00-9	CC(=O)c1ccc2Sc3ccccc3N(CCCN4CCC(CCO)CC4)c2c1	0
1959	17alpha-Ethynyl-19-nortestosterone 17-heptanoate	3836-23-5	CCCCCCC(=O)OC1(CCC2C3CCC4=CC(=O)CCC4C3CCC12C)C#C	0
1960	Fluvastatin	93957-54-1	CC(C)n1c(C=CC(O)CC(O)CC(=O)O)c(c2ccc(F)cc2)c3ccccc13	0
1961	acetophenazine	2751-68-0	CC(=O)c1ccc2Sc3ccccc3N(CCCN4CCN(CCO)CC4)c2c1	0
1962	Adapalene	106685-40-9	COc1ccc(cc1C23CC4CC(CC(C4)C2)C3)c5ccc6cc(ccc6c5)C(=O)O	0
1963	mexiprostil	88980-20-5	CCCCC(C)(OC)C(O)C=CC1C(O)CC(=O)C1CCCCCCC(=O)OC	0
1964	Testosterone cypionate	58-20-8	CC12CCC3C(CCC4=CC(=O)CCC34C)C1CCC2OC(=O)CCC5CCCC5	0
1965	Calcipotriene	112965-21-6	CC(C=CC(O)C1CC1)C2CCC3C(=CC=C4CC(O)CC(O)C4=C)CCCC23C	0
1966	Doxercalciferol	54573-75-0	CC(C)C(C)C=CC(C)C1CCC2C(=CC=C3CC(O)CC(O)C3=C)CCCC12C	0
1967	Ziprasidone	146939-27-7	Clc1cc2NC(=O)Cc2cc1CCN3CCN(CC3)c4nsc5ccccc45	0
1968	Narcotine	128-62-1	COc1ccc2C(OC(=O)c2c1OC)C3N(C)CCc4cc5OCOc5c(OC)c34	0
1969	Lasofoxifene	180916-16-9	Oc1ccc2C(C(CCc2c1)c3ccccc3)c4ccc(OCCN5CCCC5)cc4	0
1970	Talniflumate	66898-62-2	FC(F)(F)c1cccc(Nc2ncccc2C(=O)OC3OC(=O)c4ccccc34)c1	0
1971	podophyllotoxin	518-28-5	COc1cc(cc(OC)c1OC)C2C3C(COC3=O)C(O)c4cc5OCOc5cc24	0
1972	nafcillin	147-52-4	CCOc1ccc2ccccc2c1C(=O)NC3C4SC(C)(C)C(N4C3=O)C(=O)O	0
1973	Eplerenone	107724-20-9	COC(=O)C1CC2=CC(=O)CCC2(C)C34OC3CC5(C)C(CCC56CCC(=O)O6)C14	0
1974	beta-Sitosterol	83-46-5	CCC(CCC(C)C1CCC2C3CC=C4CC(O)CCC4(C)C3CCC12C)C(C)C	0
1975	teclothiazide	4267-05-4	NS(=O)(=O)c1cc2c(NC(NS2(=O)=O)C(Cl)(Cl)Cl)cc1Cl	0
1976	Salmeterol	89365-50-4	OCc1cc(ccc1O)C(O)CNCCCCCCOCCCCc2ccccc2	0
1977	Acemetacin	53164-05-9	COc1ccc2c(c1)c(CC(=O)OCC(=O)O)c(C)n2C(=O)c3ccc(Cl)cc3	0
1978	Isoconazole	27523-40-6	Clc1ccc(C(Cn2ccnc2)OCc3c(Cl)cccc3Cl)c(Cl)c1	0
1979	Miconazole	22916-47-8	Clc1ccc(COC(Cn2ccnc2)c3ccc(Cl)cc3Cl)c(Cl)c1	0
1980	Desonide	638-94-8	CC1(C)OC2CC3C4CCC5=CC(=O)C=CC5(C)C4C(O)CC3(C)C2(O1)C(=O)CO	0
1981	Ramipril	87333-19-5	CCOC(=O)C(CCc1ccccc1)NC(C)C(=O)N2C3CCCC3CC2C(=O)O	0
1982	alfentanil	71195-58-9	CCN1N=NN(CCN2CCC(COC)(CC2)N(C(=O)CC)c3ccccc3)C1=O	0
1983	Efegatran	105806-65-3	CNC(Cc1ccccc1)C(=O)N2CCCC2C(=O)NC(CCCNC(=N)N)C=O	0
1984	Spironolactone	52-01-7	CC(=O)SC1CC2=CC(=O)CCC2(C)C3CCC4(C)C(CCC45CCC(=O)O5)C13	0
1985	Calcitriol	32222-06-3	CC(CCCC(C)(C)O)C1CCC2C(=CC=C3CC(O)CC(O)C3=C)CCCC12C	0
1986	paricalcitol	131918-61-1	CC(C=CC(C)C(C)(C)O)C1CCC2C(=CC=C3CC(O)CC(O)C3)CCCC12C	0
1987	tocopherols	1406-66-2	CC(C)CCCC(C)CCCC(C)CCCC1(C)CCc2cc(O)c(C)c(C)c2O1	0
1988	temafloxacin	108319-06-8	CC1CN(CCN1)c2cc3N(C=C(C(=O)O)C(=O)c3cc2F)c4ccc(F)cc4F	0
1989	Cilazapril	88768-40-5	CCOC(=O)C(CCc1ccccc1)NC2CCCN3CCCC(N3C2=O)C(=O)O	0
1990	Nimodipine	66085-59-4	COCCOC(=O)C1=C(C)NC(=C(C1c2cccc(c2)[N+](=O)[O-])C(=O)OC(C)C)C	0
1991	artelinic acid	109637-83-4	CC1CCC2C(C)C(OCc3ccc(cc3)C(=O)O)OC4OC5(C)CCC1C24OO5	0
1992	Simvastatin	79902-63-9	CCC(C)(C)C(=O)OC1CC(C)C=C2C=CC(C)C(CCC3CC(O)CC(=O)O3)C12	0
1993	lofepramine	23047-25-8	CN(CCCN1c2ccccc2CCc3ccccc13)CC(=O)c4ccc(Cl)cc4	0
1994	Zopolrestat	110703-94-1	OC(=O)CC1=NN(Cc2nc3cc(ccc3s2)C(F)(F)F)C(=O)c4ccccc14	0
1995	(-)-(R)-2-(4-bromo-2-fluorobenzyl)spiro[1,2,3,4-tetrahydropyrrolo[1,2-a]pyrazine-4,3'-pyrrolidine]-1,2',3,5'-tetraone	147254-64-6	Fc1cc(Br)ccc1CN2C(=O)c3cccn3C4(CC(=O)NC4=O)C2=O	0
1996	Amtolmetin guacil	87344-06-7	COc1ccccc1OC(=O)CNC(=O)Cc2ccc(C(=O)c3ccc(C)cc3)n2C	0
1997	Sibrafiban	172927-65-0	CCOC(=O)COC1CCN(CC1)C(=O)C(C)NC(=O)c2ccc(cc2)C(=NO)N	0
1998	Doripenem	148016-81-3	CC(O)C1C2C(C)C(=C(N2C1=O)C(=O)O)SC3CNC(CNS(=O)(=O)N)C3	0
[truncated: 301 more rows]

## Sheet: Table S2
Table S2. The name, CAS, SMILES strings and classification of all chemicals for EI models
No.	Name	CAS	SMILES	Calss
1	2-Butyne	503-17-3	CC#CC	1
2	1-Butene	106-98-9	CCC=C	1
3	Glyoxal	107-22-2	O=CC=O	1
4	Propionaldehyde	123-38-6	CCC=O	1
5	Fluoroacetonitrile	503-20-8	FCC#N	1
6	Acetaldoxime	107-29-9	CC=NO	1
7	Methyl formate	107-31-3	COC=O	1
8	Isopropanol	67-63-0	CC(C)O	1
9	Ethanethiol	75-08-1	CCS	1
10	Chloroethane	75-00-3	CCCl	1
11	Cyclopropanecarbonitrile	5500-21-0	N#CC1CC1	1
12	(2E)-2-Butenenitrile	627-26-9	CC=CC#N	1
13	3-Butyn-2-one	1423-60-5	CC(=O)C#C	1
14	Pyrazole	288-13-1	c1cn[nH]c1	1
15	Methylenaminoacetonitrile	109-82-0	C=NCC#N	1
16	cis-1,3-Pentadiene	1574-41-0	C/C=C\C=C	1
17	Cyclopentene	142-29-0	C1CC=CC1	1
18	3-Methyl-1,2-butadiene	598-25-4	CC(=C=C)C	1
19	1-Pentyne	627-19-0	CCCC#C	1
20	2-Pentyne	627-21-4	CCC#CC	1
21	1,2,4-Triazole	288-88-0	c1nnc[nH]1	1
22	1,2,3-1H-Triazole	288-36-8	c1c[nH]nn1	1
23	Isobutyronitrile	78-82-0	CC(C)C#N	1
24	Tetrazole	288-94-8	c1nnn[nH]1	1
25	Crotonaldehyde	4170-30-3	CC=CC=O	1
26	3-Butyn-2-ol	2028-63-9	CC(O)C#C	1
27	butadiene monoxide	930-22-3	C=CC1CO1	1
28	2-Butyn-1-ol	764-01-2	CC#CCO	1
29	3-Butyn-1-ol	927-74-2	OCCC#C	1
30	Methyl Propargyl Ether	627-41-8	COCC#C	1
31	Cyclopentane	287-92-3	C1CCCC1	1
32	cis-2-Pentene	627-20-3	C/C=C\CC	1
33	Acrylamide	79-06-1	NC(=O)C=C	1
34	3-Hydroxypropionitrile	109-78-4	OCCC#N	1
35	Ethyl isocyanate	109-90-0	CCN=C=O	1
36	Butyraldehyde	123-72-8	CCCC=O	1
37	1,2-Epoxybutane	106-88-7	CCC1CO1	1
38	Ethyl vinyl ether	109-92-2	CCOC=C	1
39	Tetrahydrofuran	109-99-9	C1CCOC1	1
40	Methallyl alcohol	513-42-8	CC(=C)CO	1
41	3-Buten-1-ol	627-27-0	OCCC=C	1
42	Crotonyl alcohol	6117-91-5	CC=CCO	1
43	Isobutylene oxide	558-30-5	CC1(C)CO1	1
44	2-Butene oxide	3266-23-7	CC1OC1C	1
45	Allyl Methyl Ether	627-40-7	COCC=C	1
46	2-Methylbutane	78-78-4	CCC(C)C	1
47	N-ForMylethylaMine	627-45-2	CCNC=O	1
48	N-Methylacetamide	79-16-3	CNC(=O)C	1
49	Methyl isothiocyanate	556-61-6	CN=C=S	1
50	Ethylboronic acid	4433-63-0	CCB(O)O	1
51	(R)-(+)-Glycidol	57044-25-4	OCC1CO1	1
52	Ethyl formate	109-94-4	CCOC=O	1
53	1,3-Dioxolane	646-06-0	C1COCO1	1
54	Acethydrazide	1068-57-1	CC(=O)NN	1
55	N-Hydroxyacetamidine	22059-22-9	CC(=NO)N	1
56	tert-Butanol	75-65-0	CC(C)(C)O	1
57	2-Methyl-1-propanol	78-83-1	CC(C)CO	1
58	R-(-)-2-Butanol	14898-79-4	CCC(C)O	1
59	Ethyl nitrite	109-95-5	CCON=O	1
60	Methyl carbamate	598-55-0	COC(=O)N	1
61	Trimethylamine N-Oxide	1184-78-7	C[N+](C)(C)[O-]	1
62	Chloroacetonitrile	107-14-2	ClCC#N	1
63	Dimethoxymethane	109-87-5	COCOC	1
64	2-Hydroxyethylhydrazine	109-84-2	NNCCO	1
65	1-Propanethiol	107-03-9	CCCS	1
66	2-Propanethiol	75-33-2	CC(C)S	1
67	1-Chloro-1-propene	590-21-6	CC=CCl	1
68	2-Chloropropene	557-98-2	CC(=C)Cl	1
69	2-AMinoethanethiol	60-23-1	NCCS	1
70	FuMaronitrile	764-42-1	N#CC=CC#N	1
71	2-Mercaptoethanol	60-24-2	OCCS	1
72	2-Chloropropane	75-29-6	CC(C)Cl	1
73	1-Chloropropane	540-54-5	CCCCl	1
74	Pyrazine	290-37-9	c1cnccn1	1
75	Succinonitrile	110-61-2	N#CCCC#N	1
76	2-Pentenenitrile	13284-42-9	CCC=CC#N	1
77	N-Methyl pyrrole	96-54-8	Cn1cccc1	1
78	2-methyl-2-butenenitrile	4403-61-6	CC=C(C)C#N	1
79	pent-3-enenitrile	4635-87-4	CC=CCC#N	1
80	4-Pentenenitrile	592-51-8	C=CCCC#N	1
81	3-Methylpyrrole	616-43-3	Cc1cc[nH]c1	1
82	2,2-Difluoroethanol	359-13-7	OCC(F)F	1
83	3-Methylpyrazole	1453-58-3	Cc1cc[nH]n1	1
84	1-Methylpyrazole	930-36-9	Cn1cccn1	1
85	3-Hexyne	928-49-4	CCC#CCC	1
86	Cyclohexene	110-83-8	C1CCC=CC1	1
87	1,5-Hexadiene	592-42-7	C=CCCC=C	1
88	1-Hexyne	693-02-7	CCCCC#C	1
89	2-Hexyne	764-35-2	CCCC#CC	1
90	3,3-Dimethyl-1-butyne	917-92-0	CC(C)(C)C#C	1
91	3-methyl-1,3-pentadiene	4549-74-0	CC=C(C)C=C	1
92	trans-1,4-Hexadiene	7319-00-8	CC=CCC=C	1
93	3-Aminopyrazole	1820-80-0	Nc1cc[nH]n1	1
94	2-Methylbutyronitrile	18936-17-9	CCC(C)C#N	1
95	Valeronitrile	110-59-8	CCCCC#N	1
96	3-Methylbutanenitrile	625-28-5	CC(C)CC#N	1
97	2,2-Dimethylpropanenitril	630-18-2	CC(C)(C)C#N	1
98	2(5H)-Furanone	497-23-4	O=C1OCC=C1	1
99	Methyl propiolate	922-67-8	COC(=O)C#C	1
100	Oxazole-2-amine	4570-45-0	Nc1occn1	1
101	2-Cyanoacetamide	107-91-5	NC(=O)CC#N	1
102	5-Methyl-1H-tertazole	4076-36-2	Cc1nnn[nH]1	1
103	4-Amino-4H-1,2,4-triazole	584-13-4	Nn1cnnc1	1
104	Cyclopentanone	120-92-3	O=C1CCCC1	1
105	4-PENTYN-2-OL	2117-11-5	CC(O)CC#C	1
106	2-methyl-2-butenal	497-03-0	CC=C(C)C=O	1
107	trans-2-Pentenal	1576-87-0	CCC=CC=O	1
108	4-Pentyn-1-ol	5390-04-5	OCCCC#C	1
109	3-Pentyn-1-ol	10229-10-4	CC#CCCO	1
110	Dihydropyran	110-87-2	C1COC=CC1	1
111	Cyclopentene oxide	285-67-6	C1CC2OC2C1	1
112	2-methyl-2-imidazoline	534-26-9	CC1=NCCN1	1
113	3-Methylaminopropionitrile	693-05-0	CNCCC#N	1
114	Cyclohexane	110-82-7	C1CCCCC1	1
115	Methylcyclopentane	96-37-7	CC1CCCC1	1
116	3,3-Dimethyl-1-butene	558-37-2	CC(C)(C)C=C	1
117	2-Ethyl-1-butene	760-21-4	CCC(=C)CC	1
118	Dichloromethane	75-09-2	ClCCl	1
119	2-Pyrrolidinone	616-45-5	O=C1CCCN1	1
120	3-Methoxypropionitrile	110-67-8	COCCC#N	1
121	Propyl isocyanate	110-78-1	CCCN=C=O	1
122	Isopropyl isocyanate	1795-48-8	CC(C)N=C=O	1
123	Thiazole	288-47-1	c1cscn1	1
124	gamma-Butyrolactone	96-48-0	O=C1CCCO1	1
125	meso-1,2:3,4-Diepoxybutane	564-00-1	C1OC1C2CO2	1
126	2,3-dihydro-1,4-Dioxin	543-75-9	C1COC=CO1	1
127	Vinyl acetate	108-05-4	CC(=O)OC=C	1
128	2,3-Butanedione	431-03-8	CC(=O)C(=O)C	1
129	Ethyleneurea	120-93-4	O=C1NCCN1	1
130	3-Pentanone	96-22-0	CCC(=O)CC	1
131	2-Methylbutyraldehyde	96-17-3	CCC(C)C=O	1
132	1,2-epoxypentane	1003-14-1	CCCC1CO1	1
133	Tetrahydropyran	142-68-7	C1CCOCC1	1
134	Cyclopentanol	96-41-3	OC1CCCC1	1
135	2-Pentanone	107-87-9	CCCC(=O)C	1
136	Valeraldehyde	110-62-3	CCCCC=O	1
137	Isovaleraldehyde	590-86-3	CC(C)CC=O	1
138	3-Methyl-2-buten-1-ol	556-82-1	CC(=CCO)C	1
139	3-Methyl-3-buten-1-ol	763-32-6	CC(=C)CCO	1
140	tetrahydro-3-methylfuran	13423-15-9	CC1CCOC1	1
141	Allyl Ethyl Ether	557-31-3	CCOCC=C	1
142	Trimethylacetaldehyde	630-19-3	CC(C)(C)C=O	1
143	3-Methylpentane	96-14-0	CCC(C)CC	1
144	Hexane	110-54-3	CCCCCC	1
145	Butyraldehyde oxime	110-69-0	CCCC=NO	1
146	N-Methylpropionamide	1187-58-2	CCC(=O)NC	1
147	Ethyl isothiocyanate	542-85-8	CCN=C=S	1
148	Ethylthiocyanate	542-90-5	CCSC#N	1
149	2-Chloroacrylonitrile	920-37-6	ClC(=C)C#N	1
150	Propylboronic acid	17745-45-8	CCCB(O)O	1
151	Ethylene carbonate	96-49-1	O=C1OCCO1	1
152	Oxamide	471-46-5	NC(=O)C(=O)N	1
153	3-Hydroxy-2-butanone	513-86-0	CC(O)C(=O)C	1
154	2-Butene-1,4-diol	6117-80-2	OCC=CCO	1
155	1,4-Dioxane	123-91-1	C1COCCO1	1
156	glycidyl methyl ether	930-37-0	COCC1CO1	1
157	1,3-Dioxane	505-22-6	C1COCOC1	1
158	(S)-(+)-3-Hydroxytetrahydrofuran	86087-23-2	OC1CCOC1	1
159	2-Methyl-1,3-dioxolane	497-26-7	CC1OCCO1	1
160	4-Hydroxy-2-butanone	590-90-9	CC(=O)CCO	1
161	Formic acid isopropyl ester	625-55-8	CC(C)OC=O	1
162	1,1-Dimethylurea	598-94-7	CN(C)C(=O)N	1
163	tert-Butyl methyl ether	1634-04-4	COC(C)(C)C	1
164	3-Pentanol	584-02-1	CCC(O)CC	1
165	1-Pentanol	71-41-0	CCCCCO	1
166	3-Methyl-1-butanol	123-51-3	CC(C)CCO	1
167	(S)-(+)-2-Pentanol	26184-62-3	CCCC(C)O	1
168	Tetrahydrothiophene	110-01-0	C1CCSC1	1
169	Oxamic Acid	471-47-6	NC(=O)C(=O)O	1
170	1-Nitropropane	108-03-2	CCC[N+](=O)[O-]	1
171	N,N-Diethylhydroxylamine	3710-84-7	CCN(O)CC	1
172	3-Chloropropiononitrile	542-76-7	ClCCC#N	1
173	3-Hydroxypropionic Acid	503-66-2	OCCC(=O)O	1
174	Methyl carbazate	6294-89-9	COC(=O)NN	1
175	Carbohydrazide	497-18-7	NNC(=O)NN	1
176	1,3-Butanediol	107-88-0	CC(O)CCO	1
177	1,2-Butanediol	584-03-2	CCC(O)CO	1
178	1,1-Dimethoxyethane	534-15-6	COC(C)OC	1
179	1,1'-Thiobisethane	352-93-2	CCSCC	1
180	2-Methyl-2-propanethiol	75-66-1	CC(C)(C)S	1
181	Isobutylmercaptan	513-44-0	CC(C)CS	1
182	2-Butanethiol	513-53-1	CCC(C)S	1
183	3-Chloro-1-butene	563-52-0	CC(Cl)C=C	1
184	1-Chloro-2-butene	591-97-9	CC=CCCl	1
185	2-chloro-2-butene	4461-41-0	CC=C(C)Cl	1
186	Cylopropylmethyl chloride	5911-08-0	ClCC1CC1	1
187	2-Nitroethanol	625-48-9	OCC[N+](=O)[O-]	1
188	Toluene	108-88-3	Cc1ccccc1	1
189	Cycloheptatriene	544-25-2	C1C=CC=CC=C1	1
190	1,6-Heptadiyne	2396-63-6	C#CCCCC#C	1
191	2-Furonitrile	617-90-3	N#Cc1occc1	1
192	4-Methylpyridine	108-89-4	Cc1ccncc1	1
193	3-Aminopyridine	462-08-8	Nc1cccnc1	1
194	2-Methylpyrazine	109-08-0	Cc1cnccn1	1
195	3-Methylpyridazine	1632-76-4	Cc1cccnn1	1
196	4-Methylpyrimidine	3438-46-8	Cc1ccncn1	1
197	4-Methylpyridazine	1120-88-3	Cc1ccnnc1	1
198	Glutaronitrile	544-13-8	N#CCCCC#N	1
199	3-Chloro-1-propanol	627-30-5	OCCCCl	1
200	1-Chloro-2-propanol	127-00-4	CC(O)CCl	1
201	2-Methoxyethyl chloride	627-42-9	COCCCl	1
202	3-Hydroxypyridine	109-00-2	Oc1cccnc1	1
203	2-Hydroxypyridine	142-08-5	Oc1ccccn1	1
204	4-Hydroxypyridine	626-64-2	Oc1ccncc1	1
205	Pyridine-N-oxide	694-59-7	[O-][n+]1ccccc1	1
206	Pyrrole-2-carboxaldehyde	1003-29-8	O=Cc1ccc[nH]1	1
207	Pyridazin-3-amine	5469-70-5	Nc1cccnn1	1
208	5-AMINOPYRIMIDINE	591-55-9	Nc1cncnc1	1
209	4-Aminopyrimidine	591-54-8	Nc1ccncn1	1
210	Aminopyrazine	5049-61-6	Nc1cnccn1	1
211	2-Aminopyrimidine	109-12-6	Nc1ncccn1	1
212	Methanesulfonamide	3144-09-0	CS(=O)(=O)N	1
213	2,5-Dimethylpyrrole	625-84-3	Cc1ccc(C)[nH]1	1
214	2-Ethylpyrrole	1551-06-0	CCc1ccc[nH]1	1
215	Furfural	98-01-1	O=Cc1occc1	1
216	3-Furaldehyde	498-60-2	O=Cc1cocc1	1
217	Fluorobenzene	462-06-6	Fc1ccccc1	1
218	3-Hexyn-2-one	1679-36-3	CCC#CC(=O)C	1
219	2-Cyclohexen-1-one	930-68-7	O=C1CCCC=C1	1
220	3-Methyl-2-cyclopenten-1-one	2758-18-1	CC1=CC(=O)CC1	1
221	3,5-Dimethylpyrazole	67-51-6	Cc1cc(C)[nH]n1	1
222	2-Ethylimidazole	1072-62-4	CCc1ncc[nH]1	1
223	1-Ethylimidazole	7098-07-9	CCn1ccnc1	1
224	3-(dimethylamino)acrylonitrile	2407-68-3	CN(C)C=CC#N	1
225	4-methylcyclohexene	591-47-9	CC1CCC=CC1	1
226	1-Heptyne	628-71-7	CCCCCC#C	1
227	1,6-Heptadiene	3070-53-9	C=CCCCC=C	1
228	Chloromethyl Methyl Sulfide	2373-51-5	CSCCl	1
229	Vinylidene chloride	75-35-4	ClC(=C)Cl	1
230	cis-1,2-Dichloroethene	156-59-2	Cl/C=C\Cl	1
231	3-Fluoropyridine	372-47-4	Fc1cccnc1	1
232	2-Fluoropyridine	372-48-5	Fc1ccccn1	1
233	3-Ethoxyacrylonitrile	61310-53-0	CCOC=CC#N	1
234	1-Methyl-1H-pyrazol-3-amine	1904-31-0	Cn1ccc(N)n1	1
235	Isocapronitrile	542-54-1	CC(C)CCC#N	1
236	Hexanenitrile	628-73-9	CCCCCC#N	1
237	methyl but-2-ynoate	23326-27-4	COC(=O)C#CC	1
238	3-Methylenedihydro-2(3H)-furanone	547-65-9	C=C1CCOC1=O	1
239	3-Furanmethanol	4412-91-3	OCc1cocc1	1
240	Furfuryl alcohol	98-00-0	OCc1occc1	1
241	Ethyl propiolate	623-47-2	CCOC(=O)C#C	1
242	3-Methyl-2-pyrazolin-5-one	108-26-9	CC1=NNC(=O)C1	1
243	Cyclohexanone	108-94-1	O=C1CCCCC1	1
244	5-Hexyn-1-ol	928-90-5	OCCCCC#C	1
245	3-Hexyn-1-ol	1002-28-4	CCC#CCCO	1
246	Cyclopentanecarbaldehyde	872-53-7	O=CC1CCCC1	1
247	Mesityl oxide	141-79-7	CC(=CC(=O)C)C	1
248	trans-2-hexenal	6728-26-3	CCCC=CC=O	1
249	1,2-Epoxy-5-hexene	10353-53-4	C=CCCC1CO1	1
250	Cyclohexene oxide	286-20-4	C1CCC2OC2C1	1
251	3-methyl-pent-3-en-2-one	565-62-8	CC=C(C)C(=O)C	1
252	Allyl ether	557-40-4	C=CCOCC=C	1
253	Dimethylaminopropionitrile	1738-25-6	CN(C)CCC#N	1
254	1-Heptene	592-76-7	CCCCCC=C	1
255	1,1-Dichloroethane	75-34-3	CC(Cl)Cl	1
256	Succinimide	123-56-8	O=C1CCC(=O)N1	1
257	Methyl cyanoacetate	105-34-0	COC(=O)CC#N	1
258	Cyanoacetohydrazide	140-87-4	NNC(=O)CC#N	1
259	1H-1,2,4-Triazole-3,5-diamine	1455-77-2	Nc1n[nH]c(N)n1	1
260	5-Amino-1-methyl-1H-tetrazole	5422-44-6	Cn1nnnc1N	1
261	1-Methyl-2-pyrrolidinone	872-50-4	CN1CCCC1=O	1
262	tert-Butylisocyanate	1609-86-5	CC(C)(C)N=C=O	1
263	5-methyl-2-pyrrolidinone	108-27-0	CC1CCC(=O)N1	1
264	3-Ethoxypropionitrile	2141-62-0	CCOCCC#N	1
265	4-Methylthiazole	693-95-8	Cc1cscn1	1
266	2-Methylpiperidine	109-05-7	CC1CCCCN1	1
267	3-Methylpiperidine	626-56-2	CC1CCCNC1	1
268	4-Methylpiperidine	626-58-4	CC1CCNCC1	1
269	Trimethylsilyl cyanide	7677-24-9	C[Si](C)(C)C#N	1
270	Succinic anhydride	108-30-5	O=C1CCC(=O)O1	1
271	3,4-Diaminofurazan	17220-38-1	Nc1nonc1N	1
272	2,3-Pentanedione	600-14-6	CCC(=O)C(=O)C	1
273	Methyl methacrylate	80-62-6	COC(=O)C(=C)C	1
274	trans-Methyl crotonate	623-43-8	COC(=O)C=CC	1
275	Methyl cyclopropane carboxylate	2868-37-3	COC(=O)C1CC1	1
276	2-Aminothiazole	96-50-4	Nc1nccs1	1
277	(E)-4-Hexen-1-ol	928-92-7	CC=CCCCO	1
278	4-Methyl-2-pentanone	108-10-1	CC(C)CC(=O)C	1
279	Caproaldehyde	66-25-1	CCCCCC=O	1
280	2-Hexanone	591-78-6	CCCCC(=O)C	1
281	Methyl valeraldehyde	123-15-9	CCCC(C)C=O	1
282	2-Ethylbutyraldehyde	97-96-1	CCC(CC)C=O	1
283	1,2-Epoxyhexane	1436-34-6	CCCCC1CO1	1
284	trans-2-Hexen-1-ol	928-95-0	CCCC=CCO	1
285	3,3-Dimethylbutyraldehyde	2987-16-8	CC(C)(C)CC=O	1
286	Isobutyl vinyl ether	109-53-5	CC(C)COC=C	1
287	1-Aminopiperidine	2213-43-6	NN1CCCCC1	1
288	2-Methylhexane	591-76-4	CCCCC(C)C	1
289	Vinyltrimethylsilane	754-05-2	C[Si](C)(C)C=C	1
290	1-Aminocyclopropanecarboxylic acid	22059-21-8	NC1(CC1)C(=O)O	1
291	2-Amino-1,3,4-thiadiazole	4005-51-0	Nc1nncs1	1
292	2-Tetrahydrofurfurylamine	4795-29-3	NCC1CCCO1	1
293	N,N-Diethylformamide	617-84-5	CCN(CC)C=O	1
294	1-Butaneboronic acid	4426-47-5	CCCCB(O)O	1
295	2-Oxobutyric acid	600-18-0	CCC(=O)C(=O)O	1
296	Propylene carbonate	108-32-7	CC1COC(=O)O1	1
297	Tetrahydrofurfuryl alcohol	97-99-4	OCC1CCCO1	1
298	Acrolein dimethyl acetal	6044-68-4	COC(OC)C=C	1
299	Ethyl propionate	105-37-3	CCOC(=O)CC	1
300	Isobutyl formate	542-55-2	CC(C)COC=O	1
301	Butyl formate	592-84-7	CCCCOC=O	1
302	Methyl butyrate	623-42-7	CCCC(=O)OC	1
303	(ethoxymethyl)oxirane	4016-11-9	CCOCC1CO1	1
304	4-methyl-1,3-dioxane	1120-97-4	CC1CCOCO1	1
305	Phenylacetylene	536-74-3	C#Cc1ccccc1	1
306	3-methylpentan-1-ol	589-35-5	CCC(C)CCO	1
307	Isopropyl ether	108-20-3	CC(C)OC(C)C	1
308	4-Methyl-2-pentanol	108-11-2	CC(C)CC(C)O	1
309	tert-Butyl Ethyl Ether	637-92-3	CCOC(C)(C)C	1
310	2-Methyl-2-pentanol	590-36-3	CCCC(C)(C)O	1
311	4-Chloropyrazole	15878-00-9	Clc1cn[nH]c1	1
312	5-Chloro-1-pentyne	14267-92-6	ClCCCC#C	1
313	Biuret	108-19-0	NC(=O)NC(=O)N	1
314	2-Methyl-2-nitropropane	594-70-7	CC(C)(C)[N+](=O)[O-]	1
315	Ethyl acetohydroxamate	10576-12-2	CCOC(=NO)C	1
316	Benzonitrile	100-47-0	N#Cc1ccccc1	1
317	2-(Isopropylamino)ethanol	109-56-8	CC(C)NCCO	1
318	4-Chlorobutyronitrile	628-20-6	ClCCCC#N	1
319	Trimethyl borate	121-43-7	COB(OC)OC	1
320	Methyl (R)-(+)-lactate	17392-83-5	COC(=O)C(C)O	1
321	DL-3-hydroxy-n-butyric acid	300-85-6	CC(O)CC(=O)O	1
322	DL-2-Hydroxybutyric Acid	600-15-7	CCC(O)C(=O)O	1
323	Ethyl glycolate	623-50-7	CCOC(=O)CO	1
324	Ethyl carbazate	4114-31-2	CCOC(=O)NN	1
325	2-Cyanopyridine	100-70-9	N#Cc1ccccn1	1
326	3-Cyanopyridine	100-54-9	N#Cc1cccnc1	1
327	4-Cyanopyridine	100-48-1	N#Cc1ccncc1	1
328	2-Isopropoxyethanol	109-59-1	CC(C)OCCO	1
329	2,2-Dimethyl-1,3-propanediol	126-30-7	CC(C)(CO)CO	1
330	diethoxymethane	462-95-3	CCOCOCC	1
331	Ethylene Glycol Monopropyl Ether	2807-30-9	CCCOCCO	1
332	2,2-Dimethoxypropane	77-76-9	COC(C)(C)OC	1
333	Cyclooctatetraene	629-20-9	C1=CC=CC=CC=C1	1
334	1,4-Thioxane	15980-15-1	C1CSCCO1	1
335	2-Methyl-1-butanethiol	1878-18-8	CCC(C)CS	1
336	1-Pentanethiol	110-66-7	CCCCCS	1
337	Ethyl Propyl Sulfide	4110-50-3	CCCSCC	1
338	Ethyl Isopropyl Sulfide	5145-99-3	CCSC(C)C	1
339	Trimethylsilylmethanol	3219-63-4	C[Si](C)(C)CO	1
340	1-Chloro-3-methyl-2-butene	503-60-6	CC(=CCCl)C	1
341	Pyrazinecarbonitrile	19847-12-2	N#Cc1cnccn1	1
342	2-Cyanopyrimidine	14080-23-0	N#Cc1ncccn1	1
343	2-Amino-2-methyl-1,3-propanediol	115-69-5	CC(N)(CO)CO	1
344	glyceric acid	473-81-4	OCC(O)C(=O)O	1
345	Trimethoxymethane	149-73-5	COC(OC)OC	1
346	1,2,4-Butanetriol	3068-00-6	OCCC(O)CO	1
347	2-Methyleneglutaronitrile	1572-52-7	C=C(CCC#N)C#N	1
348	2-Vinylpyrazine	4177-16-6	C=Cc1cnccn1	1
349	1,4-dicyano-2-butene	1119-85-3	N#CCC=CCC#N	1
350	Methyl thioglycolate	2365-48-2	COC(=O)CS	1
351	o-Xylene	95-47-6	Cc1ccccc1C	1
352	Ethylenzene	100-41-4	CCc1ccccc1	1
353	p-Xylene	106-42-3	Cc1ccc(C)cc1	1
354	m-Xylene	108-38-3	Cc1cccc(C)c1	1
355	1,7-Octadiyne	871-84-1	C#CCCCCC#C	1
356	2-Chloroethyl vinyl ether	110-75-8	ClCCOC=C	1
357	3-Chloro-2-butanone	4091-39-8	CC(Cl)C(=O)C	1
358	2-Chloro-2-methylbutane	594-36-5	CCC(C)(C)Cl	1
359	1-Chloro-2,2-diMethylpropane	753-89-9	CC(C)(C)CCl	1
360	Vinyl bromide	593-60-2	BrC=C	1
361	3-Pyridinecarboxaldehyde	500-22-1	O=Cc1cccnc1	1
362	4-Pyridinecarboxaldehyde	872-85-5	O=Cc1ccncc1	1
363	2-Pyridinecarboxaldehyde	1121-60-4	O=Cc1ccccn1	1
364	Nitrosobenzene	586-96-9	O=Nc1ccccc1	1
365	o-Toluidine	95-53-4	Cc1ccccc1N	1
366	p-Toluidine	106-49-0	Cc1ccc(N)cc1	1
367	m-Toluidine	108-44-1	Cc1cccc(N)c1	1
368	N-Methylaniline	100-61-8	CNc1ccccc1	1
369	2-Ethylpyridine	100-71-0	CCc1ccccn1	1
370	2,4-Lutidine	108-47-4	Cc1ccnc(C)c1	1
371	4-Ethylpyridine	536-75-4	CCc1ccncc1	1
372	3,4-Lutidine	583-58-4	Cc1ccncc1C	1
373	3,5-Lutidine	591-22-0	Cc1cncc(C)c1	1
374	2,6-Lutidine	108-48-5	Cc1cccc(C)n1	1
375	3-Ethylpyridine	536-78-7	CCc1cccnc1	1
376	2,5-Dimethylpyridine	589-93-5	Cc1ccc(C)nc1	1
377	2,3-Lutidine	583-61-9	Cc1cccnc1C	1
378	4-cyanocyclohexene	100-45-8	N#CC1CCC=CC1	1
379	Chloromethyl Thiocyanate	3268-79-9	ClCSC#N	1
380	1,4-Benzoquinone	106-51-4	O=C1C=CC(=O)C=C1	1
381	Diaminomaleonitrile	1187-42-4	NC(=C(N)C#N)C#N	1
382	Thiourea dioxide	1758-73-2	NC(=N)S(=O)O	1
383	Anisole	100-66-3	COc1ccccc1	1
384	Phenylhydrazine	100-63-0	NNc1ccccc1	1
385	2-Amino-5-methylpyridine	1603-41-4	Cc1ccc(N)nc1	1
386	2-Amino-6-methylpyridine	1824-81-3	Cc1cccc(N)n1	1
387	2-Amino-3-picoline	1603-40-3	Cc1cccnc1N	1
388	4-Methylpyridin-2-amine	695-34-1	Cc1ccnc(N)c1	1
389	m-Phenylenediamine	108-45-2	Nc1cccc(N)c1	1
390	o-Phenylenediamine	95-54-5	Nc1ccccc1N	1
391	2,3-Dimethylpyrazine	5910-89-4	Cc1nccnc1C	1
392	2,6-Dimethylpyrazine	108-50-9	Cc1cncc(C)n1	1
393	2,5-Dimethyl pyrazine	123-32-0	Cc1cnc(C)cn1	1
394	2-Methylglutaronitrile	4553-62-2	CC(CCC#N)C#N	1
395	Ethylpyrazine	13925-00-3	CCc1cnccn1	1
396	2-(Methylamino)pyridine	4597-87-9	CNc1ccccn1	1
397	4,6-Dimethylpyrimidine	1558-17-4	Cc1cc(C)ncn1	1
398	4-Amino-2-picoline	18437-58-6	Cc1cc(N)ccn1	1
399	3-Methyl-4-aminopyridine	1990-90-5	Cc1cnccc1N	1
400	3-Mercapto-1,2-propanediol	96-27-5	OCC(O)CS	1
401	1,5-Cyclooctadiene	111-78-4	C1CC=CCCC=C1	1
402	1,3-Dimercaptopropane	109-80-8	SCCCS	1
403	Bis(methylthio)methane	1618-26-4	CSCSC	1
404	4-Chloro-1-butanol	928-51-8	OCCCCCl	1
405	2-Chloroethyl ethyl ether	628-34-2	CCOCCCl	1
406	1-Chloro-2-methyl-2-propanol	558-42-9	CC(C)(O)CCl	1
407	3-Chloropropyl methyl ether	36215-07-3	COCCCCl	1
408	Bromoethane	74-96-4	CCBr	1
409	3-Aminophenol	591-27-5	Nc1cccc(O)c1	1
410	2-Aminophenol	95-55-6	Nc1ccccc1O	1
411	4-Pyridylcarbinol	586-95-8	OCc1ccncc1	1
412	2-(Hydroxymethyl)pyridine	586-98-1	OCc1ccccn1	1
413	2-Acetyl pyrrole	1072-83-9	CC(=O)c1ccc[nH]1	1
414	2-Methoxypyridine	1628-89-3	COc1ccccn1	1
415	3-METHOXYPYRIDINE	7295-76-3	COc1cccnc1	1
416	4-Methoxypyridine	620-08-6	COc1ccncc1	1
417	4-Picoline-N-oxide	1003-67-4	Cc1cc[n+]([O-])cc1	1
418	3-Picoline-N-oxide	1003-73-2	Cc1ccc[n+]([O-])c1	1
419	1-Methyl-2-pyridone	694-85-9	CN1C=CC=CC1=O	1
420	3-Methyl-2-pyridone	1003-56-1	CC1=CC=CNC1=O	1
421	N-Methylpyrrole-2-carboxaldehyde	1192-58-1	Cn1cccc1C=O	1
422	2-Hydroxy-4-methylpyridine	13466-41-6	CC1=CC(=O)NC=C1	1
423	3-Hydroxy-6-methylpyridine	1121-78-4	Cc1ccc(O)cn1	1
424	3-Hydroxy-6-methylpyridine	108-52-1	Cc1ccnc(N)n1	1
425	2,6-Diaminopyridine	141-86-6	Nc1cccc(N)n1	1
426	2,3-Diaminopyridine	452-58-4	Nc1cccnc1N	1
427	2-Hydrazinopyridine	4930-98-7	NNc1ccccn1	1
428	2-Thiophenecarbonitrile	1003-31-2	N#Cc1cccs1	1
429	Cyclohexyl Isocyanide	931-53-3	[C-]#[N+]C1CCCCC1	1
430	1,2,5-Trimethylpyrrole	930-87-0	Cc1ccc(C)n1C	1
431	5-Methyl furfural	620-02-0	Cc1oc(C=O)cc1	1
432	2-Methoxypyrazine	3149-28-8	COc1cnccn1	1
433	2-Aminopyridine N-oxide	14150-95-9	Nc1cccc[n+]1[O-]	1
434	2,4-Diaminopyrimidine	156-81-0	Nc1ccnc(N)n1	1
435	4,5-Diaminopyrimidine	13754-19-3	Nc1cncnc1N	1
436	2-Fluorotoluene	95-52-3	Cc1ccccc1F	1
437	p-Fluorotoluene	352-32-9	Cc1ccc(F)cc1	1
438	3-Fluorotoluene	352-70-5	Cc1cccc(F)c1	1
439	Dimethyl sulfite	616-42-2	COS(=O)OC	1
440	3-Cyclohexene-1-carboxaldehyde	100-50-5	O=CC1CCC=CC1	1
441	2-Propylimidazole	50995-95-4	CCCc1ncc[nH]1	1
442	1,3,5-Trimethylpyrazole	1072-91-9	Cc1cc(C)n(C)n1	1
443	2,5-Dimethyl-2,4-hexadiene	764-13-6	CC(=CC=C(C)C)C	1
444	2,5-Dimethyl-1,5-hexadiene	627-58-7	CC(=C)CCC(=C)C	1
445	3-Chloro-1,2-propanediol	96-24-2	OCC(O)CCl	1
446	1,1-Dichloropropene	563-58-6	CC=C(Cl)Cl	1
447	cis-1,3-dichloropropene	10061-01-5	ClCC=CCl	1
448	(Aminomethyl)phosphonic acid	1066-51-9	NCP(=O)(O)O	1
449	Pyrrole-3-carboxylic acid	931-03-3	OC(=O)c1cc[nH]c1	1
450	Pyrrole-2-carboxylic acid	634-97-9	OC(=O)c1ccc[nH]1	1
451	2,3-Dihydroxypyridine	16867-04-2	Oc1cccnc1O	1
452	2,4-Dihydroxypyridine	626-03-9	Oc1ccnc(O)c1	1
453	3-Pyridinol N-oxide	6602-28-4	Oc1ccc[n+]([O-])c1	1
454	Cytosine	71-30-7	NC1=NC(=O)NC=C1	1
455	Isocytosine	108-53-2	NC1=NC=CC(=O)N1	1
456	2,4-Diamino-1,3,5-triazine	504-08-5	Nc1ncnc(N)n1	1
457	2-Fluoroaniline	348-54-9	Nc1ccccc1F	1
458	3-Fluoroaniline	372-19-0	Nc1cccc(F)c1	1
459	2-Mercaptopyridine	2637-34-5	Sc1ccccn1	1
460	4-Mercaptopyridine	4556-23-4	Sc1ccncc1	1
461	Heptanenitrile	629-08-3	CCCCCCC#N	1
462	1,1,1-Trifluoroacetone	421-50-1	CC(=O)C(F)(F)F	1
463	Citraconic anhydride	616-02-4	CC1=CC(=O)OC1=O	1
464	Itaconic anhydride	2170-03-8	C=C1CC(=O)OC1=O	1
465	2-Furoic acid	88-14-2	OC(=O)c1occc1	1
466	3-Furoic acid	488-93-7	OC(=O)c1cocc1	1
467	3,6-Dihydroxypyridazine	123-33-1	O=C1NNC(=O)C=C1	1
468	5-Pyrazolecarboxylic acid	1621-91-6	OC(=O)c1ccn[nH]1	1
469	4,6-Dihydroxypyrimidine	1193-24-4	OC1=CC(=O)NC=N1	1
470	1H-Imidazole-4-carboxylic acid	1072-84-0	OC(=O)c1cnc[nH]1	1
471	4-Fluorophenol	371-41-5	Oc1ccc(F)cc1	1
472	2-Fluorophenol	367-12-4	Oc1ccccc1F	1
473	3-Fluorophenol	372-20-3	Oc1cccc(F)c1	1
474	Allyl Acrylate	999-55-3	C=CCOC(=O)C=C	1
475	Vinyl crotonate	14861-06-4	CC=CC(=O)OC=C	1
476	Sorbic acid	110-44-1	CC=CC=CC(=O)O	1
477	Vinyl Methacrylate	4245-37-8	CC(=C)C(=O)OC=C	1
478	Ethyl 2-butynoate	4341-76-8	CCOC(=O)C#CC	1
479	3-Thiophenecarboxaldehyde	498-62-4	O=Cc1ccsc1	1
480	2-Mercaptopyrimidine	1450-85-7	Sc1ncccn1	1
481	Cyclohexanecarboxaldehyde	2043-61-0	O=CC1CCCCC1	1
482	2-Methylcyclohexanone	583-60-8	CC1CCCCC1=O	1
483	trans-2-Heptenal	18829-55-5	CCCCC=CC=O	1
484	4-Methylcyclohexanone	589-92-4	CC1CCC(=O)CC1	1
485	3-methylcyclohexanone	591-24-2	CC1CCCC(=O)C1	1
486	N,N-Diethylcyanoacetamide	3010-02-4	CCN(CC)CC#N	1
487	cis-4-octene	7642-15-1	CCCC=CCCC	1
488	1,3-Dichloropropane	142-28-9	ClCCCCl	1
489	2,2-Dichloropropane	594-20-7	CC(C)(Cl)Cl	1
490	Trifluoroacetamide	354-38-1	NC(=O)C(F)(F)F	1
491	4-Nitroimidazole	3034-38-6	[O-][N+](=O)c1c[nH]cn1	1
492	2-Nitroimidazole	527-73-1	[O-][N+](=O)c1ncc[nH]1	1
493	4-Nitropyrazole	2075-46-9	[O-][N+](=O)c1cn[nH]c1	1
494	N-Methylsuccinimide	1121-07-9	CN1C(=O)CCC1=O	1
495	Ethyl cyanoacetate	105-56-6	CCOC(=O)CC#N	1
496	Methyl 3-Cyanopropionate	4107-62-4	COC(=O)CCC#N	1
497	Caprolactam	105-60-2	O=C1CCCCCN1	1
498	N-Formylpiperidine	2591-86-8	O=CN1CCCCC1	1
499	N-Ethyl-2-pyrrolidone	2687-91-4	CCN1CCCC1=O	1
500	N-Isopropylacrylamide	2210-25-5	CC(C)NC(=O)C=C	1
501	2,4-Dimethylthiazole	541-58-2	Cc1csc(C)n1	1
502	1-butene, 4-isothiocyanato-	3386-97-8	C=CCCN=C=S	1
503	2-Ethylpiperidine	1484-80-6	CCC1CCCCN1	1
504	3,5-Dimethylpiperidine	35794-11-7	CC1CNCC(C)C1	1
505	2-Chloropyridine	109-09-1	Clc1ccccn1	1
506	3-Chloropyridine	626-60-8	Clc1cccnc1	1
507	3,4-Dihydroxy-3-cyclobutene-1,2-dione	2892-51-5	OC1=C(O)C(=O)C1=O	1
508	2,4,5-imidazolinetrione	120-89-8	O=C1NC(=O)C(=O)N1	1
509	3,3,3-Trifluoropropan-1-ol	2240-88-2	OCCC(F)(F)F	1
510	Glutaric anhydride	108-55-4	O=C1CCCC(=O)O1	1
511	Cyclopentanecarboxylic acid	3400-45-1	OC(=O)C1CCCC1	1
512	Allyl glycidyl ether	106-92-3	C=CCOCC1CO1	1
513	Ethyl methacrylate	97-63-2	CCOC(=O)C(=C)C	1
514	Acetonylacetone	110-13-4	CC(=O)CCC(=O)C	1
515	3-Hexyn-2,5-diol	3031-66-1	CC(O)C#CC(C)O	1
516	hexadienediepoxide	1888-89-7	C(CC1CO1)C2CO2	1
517	3-methylpentane-2,4-dione	815-57-6	CC(C(=O)C)C(=O)C	1
518	1,3-Dimethyl-2-imidazolidinone	80-73-9	CN1CCN(C)C1=O	1
519	1-Piperazinecarbaldehyde	7755-92-2	O=CN1CCNCC1	1
520	2-Amino-4-methylthiazole	1603-91-4	Cc1csc(N)n1	1
521	Heptaldehyde	111-71-7	CCCCCCC=O	1
522	(E)-hept-2-en-1-ol	33467-76-4	CCCCC=CCO	1
523	cis-2,6-Dimethylpiperazine	21655-48-1	CC1CNCC(C)N1	1
524	trans-2,5-Dimethylpiperazine	2815-34-1	CC1CNC(C)CN1	1
525	Diallyl sulfide	592-88-1	C=CCSCC=C	1
526	Octane	111-65-9	CCCCCCCC	1
527	2,2,4-Trimethylpentane	540-84-1	CC(C)CC(C)(C)C	1
528	2-Methylheptane	592-27-8	CCCCCC(C)C	1
529	Allyltrimethylsilane	762-72-1	C[Si](C)(C)CC=C	1
530	2-Chloropyrimidine	1722-12-9	Clc1ncccn1	1
531	2-Chloropyrazine	14508-49-7	Clc1cnccn1	1
532	2,6-Difluoropyridine	1513-65-1	Fc1cccc(F)n1	1
533	Maleamic acid	557-24-4	NC(=O)C=CC(=O)O	1
534	Methyl 3-aminocrotonate	14205-39-1	COC(=O)C=C(C)N	1
535	N-(2-hydroxyethyl)acrylamide	7646-67-5	OCCNC(=O)C=C	1
536	2-Amino-5-methyl-1,3,4-thiadiazole	108-33-8	Cc1nnc(N)s1	1
537	Diethylacetamide	685-91-6	CCN(CC)C(=O)C	1
538	4-methyl-2-pentanone oxime	105-44-2	CC(C)CC(=NO)C	1
539	N-Methyl-4-piperidinol	106-52-5	CN1CCC(O)CC1	1
540	Butyl Isothiocyanate	592-82-5	CCCCN=C=S	1
541	Isobutyl Isothiocyanate	591-82-2	CC(C)CN=C=S	1
542	sec-Butyl Isothiocyanate	4426-79-3	CCC(C)N=C=S	1
543	Fumaric acid	110-17-8	OC(=O)C=CC(=O)O	1
544	2-Oxovaleric Acid	1821-02-9	CCCC(=O)C(=O)O	1
545	Diacetyl hydrazine	3148-73-0	CC(=O)NNC(=O)C	1
546	5-Mercapto-1-methyltetrazole	13183-79-4	Cn1nnnc1S	1
547	3-Amino-5-mercapto-1,2,4-triazole	16691-43-3	Nc1n[nH]c(S)n1	1
548	Amyl Formate	638-49-3	CCCCCOC=O	1
549	Ethyl butyrate	105-54-4	CCCC(=O)OCC	1
550	DL-sec-Butyl acetate	105-46-4	CCC(C)OC(=O)C	1
551	Propyl propionate	106-36-5	CCCOC(=O)CC	1
552	2,3-epoxypropyl isopropyl ether	4016-14-2	CC(C)OCC1CO1	1
553	1,4-Butanediol vinyl ether	17832-28-9	OCCCCOC=C	1
554	tetrahydropyran-2-methanol	100-72-1	OCC1CCCCO1	1
555	4-Hydroxy-4-methyl-2-pentanone	123-42-2	CC(=O)CC(C)(C)O	1
556	Isopentyl formate	110-45-2	CC(C)CCOC=O	1
557	2,4-dimethyl-1,3-dioxane	766-20-1	CC1CCOC(C)O1	1
558	2,2,4-trimethyl-1,3-dioxolane	1193-11-9	CC1COC(C)(C)O1	1
559	1-Phenyl-1-propyne	673-32-5	CC#Cc1ccccc1	1
560	Indene	95-13-6	C1C=Cc2ccccc12	1
561	4-Ethynyltoluene	766-97-2	Cc1ccc(cc1)C#C	1
562	Allylthiourea	109-57-9	NC(=S)NCC=C	1
563	Heptan-1-ol	111-70-6	CCCCCCCO	1
564	2,4-Dimethyl-3-pentanol	600-36-2	CC(C)C(O)C(C)C	1
565	Cyclohexyl mercaptan	1569-69-3	SC1CCCCC1	1
566	Guanidineacetic acid	352-97-6	NC(=N)NCC(=O)O	1
567	4-Methylmorpholine N-oxide	7529-22-8	C[N+]1([O-])CCOCC1	1
568	2-(MethylaMino)isobutyric acid	2566-34-9	CNC(C)(C)C(=O)O	1
569	o-Tolunitrile	529-19-1	Cc1ccccc1C#N	1
570	6-Amino-1-hexanol	4048-33-3	NCCCCCCO	1
571	5-Chlorovaleronitrile	6280-87-1	ClCCCCC#N	1
572	Succinic acid	110-15-6	OC(=O)CCC(=O)O	1
573	Dimethyl oxalate	553-90-2	COC(=O)C(=O)OC	1
574	2-Methylpropanedioic acid	516-05-2	CC(C(=O)O)C(=O)O	1
575	Diethyl carbonate	105-58-8	CCOC(=O)OCC	1
576	2-Hydroxy-2-methylbutyric acid	3739-30-8	CCC(C)(O)C(=O)O	1
577	Methyl 3-methoxypropionate	3852-09-3	COCCC(=O)OC	1
578	beta-Hydroxyisovaleric Acid	625-08-1	CC(C)(O)CC(=O)O	1
579	N-(2-Aminoethyl)glycine	24123-14-6	NCCNCC(=O)O	1
580	7-Azaindole	271-63-6	c1cnc2[nH]ccc2c1	1
581	4-Aminobenzonitrile	873-74-5	Nc1ccc(cc1)C#N	1
582	Anthranilonitrile	1885-29-6	Nc1ccccc1C#N	1
583	3-Aminobenzonitrile	2237-30-1	Nc1cccc(c1)C#N	1
584	3-Pyridineacetonitrile	6443-85-2	N#CCc1cccnc1	1
585	2,5-dihydrothiophene 1,1-dioxide	77-79-2	O=S1(=O)CC=CC1	1
586	2-Butoxyethanol	111-76-2	CCCCOCCO	1
587	Acetal	105-57-7	CCOC(C)OCC	1
588	2,5-Hexanediol	2935-44-6	CC(O)CCC(C)O	1
589	1-Propoxy-2-propanol	1569-01-3	CCCOCC(C)O	1
590	2-Phenyl-1-propene	98-83-9	CC(=C)c1ccccc1	1
591	4-Methylstyrene	622-97-9	Cc1ccc(C=C)cc1	1
592	3-Methylstyrene	100-80-1	Cc1cccc(C=C)c1	1
593	2-Methylstyrene	611-15-4	Cc1ccccc1C=C	1
594	trans-1-phenyl-1-propene	873-66-5	CC=Cc1ccccc1	1
595	Propyl sulfide	111-47-7	CCCSCCC	1
596	2,2'-Thiobispropane	625-80-9	CC(C)SC(C)C	1
597	Ethoxytrimethylsilane	1825-62-3	CCO[Si](C)(C)C	1
598	2-Chlorocyclopentanone	694-28-0	ClC1CCCC1=O	1
599	2-Chlorothiophene	96-43-5	Clc1cccs1	1
600	3-Bromopropyne	106-96-7	BrCC#C	1
601	Benzoxazole	273-53-0	o1cnc2ccccc12	1
602	4-Cyanophenol	767-00-0	Oc1ccc(cc1)C#N	1
603	2-Cyanophenol	611-20-1	Oc1ccccc1C#N	1
604	3-Cyanophenol	873-62-1	Oc1cccc(c1)C#N	1
605	1H-Benzotriazole	95-14-7	c1ccc2[nH]nnc2c1	1
606	Methylsulfonylacetonitrile	2274-42-2	CS(=O)(=O)CC#N	1
607	2-Amino-2-ethyl-1,3-propanediol	115-70-8	CCC(N)(CO)CO	1
608	N,N-Dimethylformamide dimethyl acetal	4637-24-5	COC(OC)N(C)C	1
609	Methylaminoacetaldehyde dimethyl acetal	122-07-6	CNCC(OC)OC	1
610	Indoline	496-15-1	C1Cc2ccccc2N1	1
611	4-Aminostyrene	1520-21-4	Nc1ccc(C=C)cc1	1
612	5-Norbornene-2-carbonitrile	95-11-4	N#CC1CC2CC1C=C2	1
613	Bromoacetonitrile	590-17-0	BrCC#N	1
614	Dimethylolurea	140-95-4	OCNC(=O)NCO	1
615	4-Cyanopyridinium-1-olate	14906-59-3	[O-][n+]1ccc(cc1)C#N	1
616	Trimethyl orthoacetate	1445-45-0	COC(C)(OC)OC	1
617	Acetophenone	98-86-2	CC(=O)c1ccccc1	1
618	p-Tolualdehyde	104-87-0	Cc1ccc(C=O)cc1	1
619	2-Methylbenzaldehyde	529-20-4	Cc1ccccc1C=O	1
620	Phenylacetaldehyde	122-78-1	O=CCc1ccccc1	1
621	(R)-Styrene oxide	20780-53-4	C1OC1c2ccccc2	1
622	Methyl 3-mercaptopropionate	2935-90-2	COC(=O)CCS	1
623	1,8-Nonadiyne	2396-65-8	C#CCCCCCC#C	1
624	1,2,4-Trimethylbenzene	95-63-6	Cc1ccc(C)c(C)c1	1
625	Isopropylbenzene	98-82-8	CC(C)c1ccccc1	1
626	Mesitylene	108-67-8	Cc1cc(C)cc(C)c1	1
627	n-Propylbenzene	103-65-1	CCCc1ccccc1	1
628	1,2,3-Trimethylbenzene	526-73-8	Cc1cccc(C)c1C	1
629	Dithiooxamide	79-40-3	NC(=S)C(=S)N	1
630	Dimethyldimethoxysilane	1112-39-6	CO[Si](C)(C)OC	1
631	1-Chlorohexane	544-10-5	CCCCCCCl	1
632	2-Chlorohexane	638-28-8	CCCCC(C)Cl	1
633	3-Chlorohexane	2346-81-8	CCCC(Cl)CC	1
634	2-BroMopropene	557-93-7	CC(=C)Br	1
635	4-Fluorobenzonitrile	1194-02-1	Fc1ccc(cc1)C#N	1
636	3-Fluorobenzonitrile	403-54-3	Fc1cccc(c1)C#N	1
637	4-Acetylpyridine	1122-54-9	CC(=O)c1ccncc1	1
638	2-Acetylpyridine	1122-62-9	CC(=O)c1ccccn1	1
639	3-Acetylpyridine	350-03-8	CC(=O)c1cccnc1	1
640	alpha-BenzaldoxiMe	622-31-1	ON=Cc1ccccc1	1
641	N,N-Dimethylaniline	121-69-7	CN(C)c1ccccc1	1
642	2,3-Dimethylaniline	87-59-2	Cc1cccc(N)c1C	1
643	3,4-Dimethylaniline	95-64-7	Cc1ccc(N)cc1C	1
644	2,4-Dimethyl aniline	95-68-1	Cc1ccc(N)c(C)c1	1
645	2-Ethylaniline	578-54-1	CCc1ccccc1N	1
646	4-Ethylaniline	589-16-2	CCc1ccc(N)cc1	1
647	2,6-Dimethylaniline	87-62-7	Cc1cccc(C)c1N	1
648	2,5-Dimethylaniline	95-78-3	Cc1ccc(C)c(N)c1	1
649	3-Ethylaniline	587-02-0	CCc1cccc(N)c1	1
650	N-Ethylaniline	103-69-5	CCNc1ccccc1	1
651	4-Isopropylpyridine	696-30-0	CC(C)c1ccncc1	1
652	2-Propylpyridine	622-39-9	CCCc1ccccn1	1
653	2,4,6-Collidine	108-75-8	Cc1cc(C)nc(C)c1	1
654	4-Propylpyridine	1122-81-2	CCCc1ccncc1	1
655	2,3,5-Collidine	695-98-7	Cc1cnc(C)c(C)c1	1
656	Phenylboronic acid	98-80-6	OB(O)c1ccccc1	1
657	p-Hydroxybenzaldehyde	123-08-0	Oc1ccc(C=O)cc1	1
658	3-Hydroxybenzaldehyde	100-83-4	Oc1cccc(C=O)c1	1
659	p-Toluquinone	553-97-9	CC1=CC(=O)C=CC1=O	1
660	1,3-Benzodioxole	274-09-9	C1Oc2ccccc2O1	1
661	Isonicotinamide	1453-82-3	NC(=O)c1ccncc1	1
662	4-Pyridinealdoxime	696-54-8	ON=Cc1ccncc1	1
663	2-Pyridinecarbaldehyde oxime	873-69-8	O=NC=C1NC=CC=C1	1
664	2-Picolinamide	1452-77-3	NC(=O)c1ccccn1	1
665	Acetylpyrazine	22047-25-2	CC(=O)c1cnccn1	1
666	4-Methylbenzyl alcohol	589-18-4	Cc1ccc(CO)cc1	1
667	Phenethyl alcohol	60-12-8	OCCc1ccccc1	1
668	4-Methylanisole	104-93-8	COc1ccc(C)cc1	1
669	3-Methylbenzyl alcohol	587-03-1	Cc1cccc(CO)c1	1
670	(R)-(+)-1-Phenylethanol	1517-69-7	CC(O)c1ccccc1	1
671	3,4-Diaminotoluene	496-72-0	Cc1ccc(N)c(N)c1	1
672	2,3-Diaminotoluene	2687-25-4	Cc1cccc(N)c1N	1
673	2,5-Diaminotoluene	95-70-5	Cc1cc(N)ccc1N	1
674	2-Dimethylaminopyridine	5683-33-0	CN(C)c1ccccn1	1
675	4-Dimethylaminopyridine	1122-58-3	CN(C)c1ccncc1	1
676	2,6-Diaminotoluene	823-40-5	Cc1c(N)cccc1N	1
677	Trimethyl-pyrazine	14667-55-1	Cc1cnc(C)c(C)n1	1
678	2-Amino-4,6-dimethylpyridine	5407-87-4	Cc1cc(C)nc(N)c1	1
679	1-Methyl-1-phenylhydrazine	618-40-6	CN(N)c1ccccc1	1
680	1,5-Dicyanopentane	646-20-8	N#CCCCCCC#N	1
681	2,6-Dimethyl-pyridin-4-ylamine	3512-80-9	Cc1cc(N)cc(C)n1	1
682	2-Ethyl-3-methylpyrazine	15707-23-0	CCc1nccnc1C	1
683	Diethyl disulfide	110-81-6	CCSSCC	1
684	1,4-Butanedithiol	1191-08-8	SCCCCS	1
685	Ethyl chloroacetate	105-39-5	CCOC(=O)CCl	1
686	(S)-(-)-Methyl 2-chloropropionate	73246-45-4	COC(=O)C(C)Cl	1
687	1,4-Dichloro-2-butyne	821-10-3	ClCC#CCCl	1
688	1-Bromopropane	106-94-5	CCCBr	1
689	Isonicotinic acid	55-22-1	OC(=O)c1ccncc1	1
690	Picolinic acid	98-98-6	OC(=O)c1ccccn1	1
691	2-Amino-p-cresol	95-84-1	Cc1ccc(O)c(N)c1	1
692	p-Anisidine	104-94-9	COc1ccc(N)cc1	1
693	3-Aminobenzylalcohol	1877-77-6	Nc1cccc(CO)c1	1
694	2-Aminobenzylalcohol	5344-90-1	Nc1ccccc1CO	1
695	m-Anisidine	536-90-3	COc1cccc(N)c1	1
696	4-Amino-m-cresol	2835-99-6	Cc1cc(O)ccc1N	1
697	4-Aminobenzyl alcohol	623-04-1	Nc1ccc(CO)cc1	1
698	4-Amino-2-methylphenol	2835-96-3	Cc1cc(N)ccc1O	1
699	3-Amino-2-methylphenol	53222-92-7	Cc1c(N)cccc1O	1
700	5-Amino-o-cresol	2835-95-2	Cc1ccc(N)cc1O	1
701	2-Amino-3-methylphenol	2835-97-4	Cc1cccc(O)c1N	1
702	6-Amino-m-cresol	2835-98-5	Cc1ccc(N)c(O)c1	1
703	2-(2-Hydroxyethyl)pyridine	103-74-2	OCCc1ccccn1	1
704	6-Methyl-2-pyridineMethanol	1122-71-0	Cc1cccc(CO)n1	1
705	2,6-Dimethylpyridine N-oxide	1073-23-0	Cc1cccc(C)[n+]1[O-]	1
706	2-Ethoxypyridine	14529-53-4	CCOc1ccccn1	1
707	2-Amino-4,6-dimethylpyrimidine	767-15-7	Cc1cc(C)nc(N)n1	1
708	4-Amino-2,6-dimethylpyrimidine	461-98-3	Cc1cc(N)nc(C)n1	1
709	3,3'-IMinodipropionitrile	111-94-4	N#CCCNCCC#N	1
710	2-Thiopheneacetonitrile	20893-30-5	N#CCc1cccs1	1
711	2,4-Dimethyl-3-ethyl-1H-pyrrole	517-22-6	CCc1c(C)c[nH]c1C	1
712	3-Nitropyridine	2530-26-9	[O-][N+](=O)c1cccnc1	1
713	2-Fluorobenzaldehyde	446-52-6	Fc1ccccc1C=O	1
714	4-Fluorobenzaldehyde	459-57-4	Fc1ccc(C=O)cc1	1
715	3-Fluorobenzaldehyde	456-48-4	Fc1cccc(C=O)c1	1
716	4-Methylcatechol	452-86-8	Cc1ccc(O)c(O)c1	1
717	Orcinol	504-15-4	Cc1cc(O)cc(O)c1	1
718	2-Methylhydroquinone	95-71-6	Cc1cc(O)ccc1O	1
719	2-Hydroxybenzyl alcohol	90-01-7	OCc1ccccc1O	1
720	3-Methylcatechol	488-17-5	Cc1cccc(O)c1O	1
721	3-Hydroxybenzyl alcohol	620-24-6	OCc1cccc(O)c1	1
722	4-Hydroxybenzyl alcohol	623-05-2	OCc1ccc(O)cc1	1
723	2-Methylresorcinol	608-25-3	Cc1c(O)cccc1O	1
724	4,6-Dimethyl-2-hydroxypyrimidine	108-79-2	CC1=CC(=NC(=O)N1)C	1
725	5-Amino-2-methoxypyridine	6628-77-9	COc1ccc(N)cn1	1
726	2-Methoxy-3-methylpyrazine	2847-30-5	COc1nccnc1C	1
727	3-AMino-5,6-diMethyl-1,2,4-triazine	17584-12-2	Cc1nnc(N)nc1C	1
728	Ethyl methanesulfonate	62-50-0	CCOS(=O)(=O)C	1
729	1-Ethynyl-1-cyclohexanol	78-27-3	OC1(CCCCC1)C#C	1
730	1,2-Epoxy-4-vinylcyclohexane	106-86-5	C=CC1CCC2OC2C1	1
731	1-CyanoMethylpiperidine	3010-03-5	N#CCN1CCCCC1	1
732	Thioanisole	100-68-5	CSc1ccccc1	1
733	Benzyl mercaptan	100-53-8	SCc1ccccc1	1
734	3-Methylbenzenethiol	108-40-7	Cc1cccc(S)c1	1
735	p-Toluenethiol	106-45-6	Cc1ccc(S)cc1	1
736	2-Methylbenzenethiol	137-06-4	Cc1ccccc1S	1
737	1-Nonyne	3452-09-3	CCCCCCCC#C	1
738	1,8-Nonadiene	4900-30-5	C=CCCCCCC=C	1
739	2,3-Dimercapto-1-propanol	59-52-9	OCC(S)CS	1
740	2-(2-Chloroethoxy)ethanol	628-89-7	OCCOCCCl	1
741	Bromomethyl methyl ether	13057-17-5	COCBr	1
742	3-chloro-2-(chloromethyl)prop-1-ene	1871-57-4	ClCC(=C)CCl	1
743	1,3-Dichloro-2-butene	926-57-8	CC(=CCCl)Cl	1
744	1-Cyano-2-propenyl Acetate	15667-63-7	CC(=O)OC(C=C)C#N	1
745	N-Methylpyrrole-2-carboxylic acid	6973-60-0	Cn1cccc1C(=O)O	1
746	Methyl Pyrrole-2-carboxylate	1193-62-0	COC(=O)c1ccc[nH]1	1
747	6-Methyl-1,3,5-triazine-2,4-diamine	542-02-9	Cc1nc(N)nc(N)n1	1
748	2,4,6-Triaminopyrimidine	1004-38-2	Nc1cc(N)nc(N)n1	1
749	2-Fluoro-4-methylaniline	452-80-2	Cc1ccc(N)c(F)c1	1
750	4-Fluoro-2-methylaniline	452-71-1	Cc1cc(F)ccc1N	1
751	3-Fluoro-4-methylaniline	452-77-7	Cc1ccc(N)cc1F	1
752	Taurine	107-35-7	NCCS(=O)(=O)O	1
753	Isocyanatocyclohexane	3173-53-3	O=C=NC1CCCCC1	1
754	Pivaloylacetonitrile	59997-51-2	CC(C)(C)C(=O)CC#N	1
755	4-Methyl-5-vinylthiazole	1759-28-0	Cc1ncsc1C=C	1
756	2-Methylthiopyridine	18438-38-5	CSc1ccccn1	1
757	INDOLIZINE	274-40-8	C1CCN2CCCC2C1	1
758	2,3-Dimethylmaleic anhydride	766-39-2	CC1=C(C)C(=O)OC1=O	1
759	Pyrogallol	87-66-1	Oc1cccc(O)c1O	1
760	Pyrogallol	108-73-6	Oc1cc(O)cc(O)c1	1
761	1,2,4-Benzenetriol	533-73-3	Oc1ccc(O)c(O)c1	1
762	5-Hydroxymethylfurfural	67-47-0	OCc1oc(C=O)cc1	1
763	3-Hydroxy-2-methyl-4H-pyran-4-one	118-71-8	CC1=C(O)C(=O)C=CO1	1
764	Methyl 2-furoate	611-13-2	COC(=O)c1occc1	1
765	4-Hydroxy-6-methyl-2-pyrone	675-10-5	CC1=CC(=CC(=O)O1)O	1
766	2,4-Diamino-6-hydroxypyrimidine	56-06-4	Nc1cc(O)nc(N)n1	1
767	4,5-Diamino-6-hydroxypyrimidine	1672-50-0	Nc1ncnc(O)c1N	1
768	1-Cyclohexene-1-carboxylic acid	636-82-8	OC(=O)C1=CCCCC1	1
769	tert-Butyl Propiolate	13831-03-3	CC(C)(C)OC(=O)C#C	1
770	3,5-Dimethylpyrazole-1-methanol	85264-33-1	Cc1cc(C)n(CO)n1	1
771	4-Mercaptophenol	637-89-8	Oc1ccc(S)cc1	1
772	3-Hydroxythiophenol	40248-84-8	Oc1cccc(S)c1	1
773	2-(Methylthio)pyrazine	21948-70-9	CSc1cnccn1	1
774	Cyclohexyl vinyl ether	2182-55-0	C=COC1CCCCC1	1
775	CYCLOOCTANONE	502-49-8	O=C1CCCCCCC1	1
776	3-Octen-2-one	1669-44-9	CCCCC=CC(=O)C	1
777	(E)-2-Octenal	2548-87-0	CCCCCC=CC=O	1
778	1-Octen-3-one	4312-99-6	CCCCCC(=O)C=C	1
779	1,2-Epoxycyclooctane	286-62-4	C1CCCC2OC2CC1	1
780	2-Norbornanemethanol	5240-72-2	OCC1CC2CCC1C2	1
781	N,N'-Diisopropylcarbodiimide	693-13-0	CC(C)N=C=NC(C)C	1
782	1-Nonene	124-11-8	CCCCCCCC=C	1
783	4-Chlorotoluene	106-43-4	Cc1ccc(Cl)cc1	1
784	1,1-Dichloroacetone	513-88-2	CC(=O)C(Cl)Cl	1
785	5-Methyl-4-isoxazolecarboxylic acid	42831-50-5	Cc1oncc1C(=O)O	1
786	5-Methylisoxazole-3-carboxylic acid	3405-77-4	Cc1onc(c1)C(=O)O	1
787	2-Amino-4,6-dihydroxypyrimidine	56-09-7	NC1=NC(=CC(=O)N1)O	1
788	2-Methyl-4-nitroimidazole	696-23-1	Cc1ncc([nH]1)[N+](=O)[O-]	1
789	3-Methyl-4-nitropyrazole	5334-39-4	Cc1[nH]ncc1[N+](=O)[O-]	1
790	N-EthylsucciniMide	2314-78-5	CCN1C(=O)CCC1=O	1
791	2-Pyridinethiol 1-oxide	1121-31-9	[O-][n+]1ccccc1S	1
792	4-AllylMorpholine	696-57-1	C=CCN1CCOCC1	1
793	N-tert-ButylacrylaMide	107-58-4	CC(C)(C)NC(=O)C=C	1
794	4-Penten-1-yl Isothiocyanate	18060-79-2	C=CCCCN=C=S	1
795	3-Chloroaniline	108-42-9	Nc1cccc(Cl)c1	1
796	6-Chloro-2-picoline	18368-63-3	Cc1cccc(Cl)n1	1
797	2-Chloro-4-picoline	3678-62-4	Cc1ccnc(Cl)c1	1
798	Dichloroacetamide	683-72-7	NC(=O)C(Cl)Cl	1
799	Barbituric acid	67-52-7	O=C1CC(=O)NC(=O)N1	1
800	AMMELIDE	645-93-2	NC1=NC(=O)NC(=O)N1	1
801	1H-Tetrazole-5-acetic acid	21743-75-9	OC(=O)Cc1nnn[nH]1	1
802	Tetracyanoethylene	670-54-2	N#CC(=C(C#N)C#N)C#N	1
803	4,4,4-Trifluorobutane-1-ol	461-18-7	OCCCC(F)(F)F	1
804	2-Acetylbutyrolactone	517-23-7	CC(=O)C1CCOC1=O	1
805	N-(2-Cyanoethyl)glycine	3088-42-4	OC(=O)CNCCC#N	1
806	1,4-Dicyanobenzene	623-26-7	N#Cc1ccc(cc1)C#N	1
807	2-Thiophenecarboxylic acid	527-72-0	OC(=O)c1cccs1	1
808	3-Thiophenezoic acid	88-13-1	OC(=O)c1ccsc1	1
809	4-Fluorothiophenol	371-42-6	Fc1ccc(S)cc1	1
810	Cyclohexanecarboxylic acid	98-89-5	OC(=O)C1CCCCC1	1
811	3-Ethyl-2,4-pentanedione	1540-34-7	CCC(C(=O)C)C(=O)C	1
812	Cyclopentylacetic acid	1123-00-8	OC(=O)CC1CCCC1	1
813	3,3-diethoxy-1-propyne	10160-87-9	CCOC(OCC)C#C	1
814	3-methylhexane-2,5-dione	4437-50-7	CC(CC(=O)C)C(=O)C	1
815	Butyl acrylate	141-32-2	CCCCOC(=O)C=C	1
816	tert-Butyl acrylate	1663-39-4	CC(C)(C)OC(=O)C=C	1
817	2-Ethoxy-3,4-dihydro-2H-pyran	103-75-3	CCOC1CCC=CO1	1
818	4-Pentenyl Acetate	1576-85-8	CC(=O)OCCCC=C	1
819	Pipecolamide	19889-77-1	NC(=O)C1CCCCN1	1
820	1,3-Dimethyl-3,4,5,6-tetrahydro-2(1H)-pyrimidinone	7226-23-5	CN1CCCN(C)C1=O	1
821	1-Acetylpiperazine	13889-98-0	CC(=O)N1CCNCC1	1
822	3-Octanone	106-68-3	CCCCCC(=O)CC	1
823	5-Methyl-3-heptanone	541-85-5	CCC(C)CC(=O)CC	1
824	1-Ethylcyclohexanol	1940-18-7	CCC1(O)CCCCC1	1
825	2-Ethylhexanal	123-05-7	CCCCC(CC)C=O	1
826	Octanal	124-13-0	CCCCCCCC=O	1
827	1,2-Epoxyoctane	2984-50-1	CCCCCCC1CO1	1
828	n-Nonane	111-84-2	CCCCCCCCC	1
829	3-Chlorophenol	108-43-0	Oc1cccc(Cl)c1	1
830	2-Chloro-3-pyridinamine	6298-19-7	Nc1cccnc1Cl	1
831	2-Chloro-6-methylpyrazine	38557-71-0	Cc1cncc(Cl)n1	1
832	2-Amino-5-chloropyridine	1072-98-6	Nc1ccc(Cl)cn1	1
833	1,3-Dichloro-2-propanol	96-23-1	OC(CCl)CCl	1
834	Cyanuric acid	108-80-5	O=C1NC(=O)NC(=O)N1	1
835	2,4-Difluoroaniline	367-25-9	Nc1ccc(F)cc1F	1
836	L-Pyroglutamic acid	98-79-3	OC(=O)C1CCC(=O)N1	1
837	N-MethylMaleaMic acid	6936-48-7	CNC(=O)C=CC(=O)O	1
838	DL-Pipecolinic acid	535-75-1	OC(=O)C1CCCCN1	1
839	N-Acetylmorpholine	1696-20-4	CC(=O)N1CCOCC1	1
840	Nitrocyclohexane	1122-60-7	[O-][N+](=O)C1CCCCC1	1
841	Isonipecotic acid	498-94-2	OC(=O)C1CCNCC1	1
842	Nipecotic acid	498-95-3	OC(=O)C1CCCNC1	1
843	Quinoline	91-22-5	c1ccc2ncccc2c1	1
844	Isoquinoline	119-65-3	c1ccc2cnccc2c1	1
845	Cinnamonitrile	1885-38-7	N#CC=Cc1ccccc1	1
846	4-Piperidineethanol	622-26-4	OCCC1CCNCC1	1
847	2-Piperidinoethanol	3040-44-6	OCCN1CCCCC1	1
848	1-Ethyl-3-hydroxypiperidine	13444-24-1	CCN1CCCC(O)C1	1
849	1,3,5-TriMethylhexahydro-1,3,5-triazine	108-74-7	CN1CN(C)CN(C)C1	1
850	2-Chloro-3-hydroxypyridine	6636-78-8	Oc1cccnc1Cl	1
851	2-Chloro-4-hydroxypyridine	17368-12-6	Oc1ccnc(Cl)c1	1
852	6-Chloropyridn-2-ol	16879-02-0	Oc1cccc(Cl)n1	1
853	4-Chloropyridine N-oxide	1121-76-2	[O-][n+]1ccc(Cl)cc1	1
854	5-Chloropyrimidin-2-amine	5428-89-7	Nc1ncc(Cl)cn1	1
855	6-Chloropyridazin-3-amine	5469-69-2	Nc1ccc(Cl)nn1	1
856	5-Fluorouracil	51-21-8	FC1=CNC(=O)NC1=O	1
857	2,6-Difluorophenol	28177-48-2	Oc1c(F)cccc1F	1
858	Itaconic acid	97-65-4	OC(=O)CC(=C)C(=O)O	1
859	Mesaconic acid	498-24-8	CC(=CC(=O)O)C(=O)O	1
860	2,3-Dicyanopyrazine	13481-25-9	N#Cc1nccnc1C#N	1
861	2-Hydroxyethyl methacrylate	868-77-9	CC(=C)C(=O)OCCO	1
862	Ethyl acetoacetate	141-97-9	CCOC(=O)CC(=O)C	1
863	5-Oxohexanoate	3128-06-1	CC(=O)CCCC(=O)O	1
864	Quinoxaline	91-19-0	c1ccc2nccnc2c1	1
865	3-AMino-5-Methylthio-1H-1,2,4-triazole	45534-08-5	CSc1nnc(N)[nH]1	1
866	Butyl propionate	590-01-2	CCCCOC(=O)CC	1
867	Hexyl ForMate	629-33-4	CCCCCCOC=O	1
868	Butyl glycidyl ether	2426-08-6	CCCCOCC1CO1	1
869	tert-Butyl Glycidyl Ether	7665-72-7	CC(C)(C)OCC1CO1	1
870	Acrolein diethyl acetal	3054-95-3	CCOC(OCC)C=C	1
871	N-(2-Hydroxyethyl)piperazine	103-76-4	OCCN1CCNCC1	1
872	Capryl alcohol	111-87-5	CCCCCCCCO	1
873	Di-n-butyl ether	142-96-1	CCCCOCCCC	1
874	2-Ethylhexanol	104-76-7	CCCCC(CC)CO	1
875	3-Octanol	589-98-0	CCCCCC(O)CC	1
876	D(+)-2-Octanol	6169-06-8	CCCCCCC(C)O	1
877	Ethoxydimethylvinylsilane	5356-83-2	CCO[Si](C)(C)C=C	1
878	2-Chlorofluorobenzene	348-51-6	Fc1ccccc1Cl	1
879	4-Cyanobenzaldehyde	105-07-7	O=Cc1ccc(cc1)C#N	1
880	3-Cyanobenzaldehyde	24964-64-5	O=Cc1cccc(c1)C#N	1
881	Benzoyl cyanide	613-90-1	O=C(C#N)c1ccccc1	1
882	2-Dimethylaminoethyl acetate	1421-89-2	CN(C)CCOC(=O)C	1
883	2-Morpholinoethanol	622-40-2	OCCN1CCOCC1	1
884	TripropargylaMine	6921-29-5	C#CCN(CC#C)CC#C	1
885	4-Methylbenzyl cyanide	2947-61-7	Cc1ccc(CC#N)cc1	1
886	6-Methylindole	3420-02-8	Cc1ccc2cc[nH]c2c1	1
887	3-Methylbenzyl cyanide	2947-60-6	Cc1cccc(CC#N)c1	1
888	3-Methylindole	83-34-1	Cc1c[nH]c2ccccc12	1
889	5-Methylindole	614-96-0	Cc1ccc2[nH]ccc2c1	1
890	7-Methylindole	933-67-5	Cc1cccc2cc[nH]c12	1
891	3-Phenylpropionitrile	645-59-0	N#CCCc1ccccc1	1
892	2-Phenylpropionitrile	1823-91-2	CC(C#N)c1ccccc1	1
893	4-Methylindole	16096-32-5	Cc1cccc2[nH]ccc12	1
894	2-Methylbenzyl cyanide	22364-68-7	Cc1ccccc1CC#N	1
895	3-DiethylaMino-1-propanol	622-93-5	CCN(CC)CCCO	1
896	Trichloroethylene	79-01-6	ClC=C(Cl)Cl	1
897	2,2,3,3-Tetrafluoro-1-propanol	76-37-9	OCC(F)(F)C(F)F	1
898	1,1,2,2-Tetrafluoroethyl methyl ether	425-88-7	COC(F)(F)C(F)F	1
899	cis-Epoxysuccinic Acid	16533-72-5	OC(=O)C1OC1C(=O)O	1
900	1,2,4-Trifluorobenzene	367-23-7	Fc1ccc(F)c(F)c1	1
901	1,3,5-Trifluorobenzene	372-38-3	Fc1cc(F)cc(F)c1	1
902	Dimethyl malonate	108-59-8	COC(=O)CC(=O)OC	1
903	1,5-Pentanedioic acid	110-94-1	OC(=O)CCCC(=O)O	1
904	Dimethylmalonic acid	595-46-0	CC(C)(C(=O)O)C(=O)O	1
905	EthylMalonic Acid	601-75-2	CCC(C(=O)O)C(=O)O	1
906	(R)-(+)-Methylsuccinic acid	3641-51-8	CC(CC(=O)O)C(=O)O	1
907	N-Methyl-N-nitrosourethane	615-53-2	CCOC(=O)N(C)N=O	1
908	2-AMino-1,1,3-tricyano-1-propene	868-54-2	NC(=C(C#N)C#N)CC#N	1
909	2,2-DiMethyl-1,3-dioxolane-4-Methanol	100-79-8	CC1(C)OCC(CO)O1	1
910	3-Allyloxy-1,2-propanediol	123-34-2	OCC(O)COCC=C	1
911	Ethyl 2-hydroxyisobutyrate	80-55-7	CCOC(=O)C(C)(C)O	1
912	2,5-Dimethoxytetrahydrofuran	696-59-3	COC1CCC(OC)O1	1
913	trans-Cinnamaldehyde	14371-10-9	O=CC=Cc1ccccc1	1
914	1-Phenyl-2-propyn-1-ol	4187-87-5	OC(C#C)c1ccccc1	1
915	5-Aminoindole	5192-03-0	Nc1ccc2[nH]ccc2c1	1
916	2-Methylbenzimidazole	615-15-6	Cc1nc2ccccc2[nH]1	1
917	1-Butoxy-2-propanol	5131-66-8	CCCCOCC(C)O	1
918	1,2,3,4-Tetrahydronaphthalene	119-64-2	C1CCc2ccccc2C1	1
919	2-Methyl-1-phenylpropene	768-49-0	CC(=Cc1ccccc1)C	1
920	p,α-DiMethylstyrene	1195-32-0	CC(=C)c1ccc(C)cc1	1
921	2-Isopropenyltoluene	7399-49-7	CC(=C)c1ccccc1C	1
922	1-Heptanethiol	1639-09-4	CCCCCCCS	1
923	1,1,3,3-Tetramethyldisiloxane	3277-26-7	C[Si](C)O[Si](C)C	1
924	2-Chlorocyclohexanone	822-87-7	ClC1CCCCC1=O	1
925	1-BroMo-2-butyne	3355-28-0	CC#CCBr	1
926	Iminodiacetic acid	142-73-4	OC(=O)CNCC(=O)O	1
927	Ethyl nitroacetate	626-35-7	CCOC(=O)C[N+](=O)[O-]	1
928	IsoaMyl Nitrate	543-87-3	CC(C)CCO[N+](=O)[O-]	1
929	AMyl Nitrate	1002-16-0	CCCCCO[N+](=O)[O-]	1
930	Anisonitrile	874-90-8	COc1ccc(cc1)C#N	1
931	3-Methoxybenzonitrile	1527-89-5	COc1cccc(c1)C#N	1
932	4-Hydroxybenzyl cyanide	14191-95-8	Oc1ccc(CC#N)cc1	1
933	5-Hydroxyindole	1953-54-4	Oc1ccc2[nH]ccc2c1	1
934	p-Tolyl isocyanate	622-58-2	Cc1ccc(cc1)N=C=O	1
935	2-Methylbenzoxazole	95-21-6	Cc1oc2ccccc2n1	1
936	2-Methylphenyl isocyanate	614-68-6	Cc1ccccc1N=C=O	1
937	2-Methoxybenzonitrile	6609-56-9	COc1ccccc1C#N	1
938	4-Hydroxyindole	2380-94-1	Oc1cccc2[nH]ccc12	1
939	5-Indazolamine	19335-11-6	Nc1ccc2[nH]ncc2c1	1
940	5-Methyl-1H-benzotriazole	136-85-6	Cc1ccc2[nH]nnc2c1	1
941	2-Aminobenzimidazole	934-32-7	Nc1nc2ccccc2[nH]1	1
942	5-AMinobenziMidazole	934-22-5	Nc1ccc2[nH]cnc2c1	1
943	6-Aminoindazole	6967-12-0	Nc1ccc2cn[nH]c2c1	1
944	L(-)-Thiazolidine-4-carboxylic acid	34592-47-7	OC(=O)C1CSCN1	1
945	Diisopropanolamine	110-97-4	CC(O)CNCC(C)O	1
946	5-Aminoindan	24425-40-9	Nc1ccc2CCCc2c1	1
947	N-Allylaniline	589-09-3	C=CCNc1ccccc1	1
948	1,2,3,4-Tetrahydroquinoline	635-46-1	C1CNc2ccccc2C1	1
949	1,2,3,4-Tetrahydroisoquinoline	91-21-4	C1Cc2ccccc2CN1	1
950	2,3-Cyclohexeno pyridine	10500-57-9	C1CCc2ncccc2C1	1
951	5,6,7,8-tetrahydroisoquinoline	36556-06-6	C1CCc2cnccc2C1	1
952	1-Indanamine	34698-41-4	NC1CCc2ccccc12	1
953	5-Amino-1,3,4-thiadiazole-2-thiol	2349-67-9	NC1=NNC(=S)S1	1
954	1-Hydroxy-2,1-benzoxaborolane	5735-41-1	OB1OCc2ccccc12	1
955	3-broMopropionitrile	2417-90-5	BrCCC#N	1
956	Diglycolic acid	110-99-6	OC(=O)COCC(=O)O	1
957	Malic acid	6915-15-7	OC(CC(=O)O)C(=O)O	1
958	2,2-Bis(hydroxymethyl)propionic acid	4767-03-7	CC(CO)(CO)C(=O)O	1
959	Phthalide	87-41-2	O=C1OCc2ccccc12	1
960	o-Phthalaldehyde	643-79-8	O=Cc1ccccc1C=O	1
961	Pramipexole Impurity (2-Aminobenzoxazole)	4570-41-6	Nc1oc2ccccc2n1	1
962	(Acetylthio)acetic Acid	1190-93-8	CC(=O)SCC(=O)O	1
963	2(2-Ethoxyethoxy)ethanol	111-90-0	CCOCCOCCO	1
964	5-Hydroxyindan	1470-94-6	Oc1ccc2CCCc2c1	1
965	Cinnamyl alcohol	104-54-1	OCC=Cc1ccccc1	1
966	4-Methoxystyrene	637-69-4	COc1ccc(C=C)cc1	1
967	2-Phenyl propionaldehyde	93-53-8	CC(C=O)c1ccccc1	1
968	Phenylpropyl aldehyde	104-53-0	O=CCCc1ccccc1	1
969	1-Indanol	6351-10-6	OC1CCc2ccccc12	1
970	2-Indanol	4254-29-9	OC1Cc2ccccc2C1	1
971	1,2,3,4-Tetrahydro-quinoxaline	3476-89-9	C1CNc2ccccc2N1	1
972	1,3-Diethylbenzene	141-93-5	CCc1cccc(CC)c1	1
973	sec-Butylbenzene	135-98-8	CCC(C)c1ccccc1	1
974	4-Isopropyltoluene	99-87-6	CC(C)c1ccc(C)cc1	1
975	tert-Butylbenzene	98-06-6	CC(C)(C)c1ccccc1	1
976	M-CyMene	535-77-3	CC(C)c1cccc(C)c1	1
977	o-CyMene	527-84-4	CC(C)c1ccccc1C	1
978	Diethylbenzene	25340-17-4	CCc1ccccc1CC	1
979	Isobutylbenzene	538-93-2	CC(C)Cc1ccccc1	1
980	1-METHYL-3-PROPYLBENZENE	1074-43-7	CCCc1cccc(C)c1	1
981	4-Propyltoluene	1074-55-1	CCCc1ccc(C)cc1	1
982	3-Chloroacetylacetone	1694-29-7	CC(=O)C(Cl)C(=O)C	1
983	1-Chloropinacolone	13547-70-1	CC(C)(C)C(=O)CCl	1
984	1-Chloroheptane	629-06-1	CCCCCCCCl	1
985	4-Bromo-1-butene	5162-44-7	BrCCC=C	1
986	3,4-Dihydroxybenzonitrile	17345-61-8	Oc1ccc(cc1O)C#N	1
987	2-Aminopurine	452-06-2	Nc1ncc2[nH]cnc2n1	1
988	Adenine	73-24-5	Nc1ncnc2nc[nH]c12	1
989	4-Aminopyrazolo[3,4-d]pyrimidine	2380-63-4	Nc1ncnc2[nH]ncc12	1
990	2-Fluorobenzyl cyanide	326-62-5	Fc1ccccc1CC#N	1
991	4-Fluorophenylacetonitrile	459-22-3	Fc1ccc(CC#N)cc1	1
992	4-Aminoacetophenone	99-92-3	CC(=O)c1ccc(N)cc1	1
993	3-Aminoacetophenone	99-03-6	CC(=O)c1cccc(N)c1	1
994	2-Aminoacetophenone	551-93-9	CC(=O)c1ccccc1N	1
995	N-Methylformanilide	93-61-8	CN(C=O)c1ccccc1	1
996	2-MethylforManilide	94-69-9	Cc1ccccc1NC=O	1
997	N,N-DiMethyl-p-toluidine	99-97-8	CN(C)c1ccc(C)cc1	1
998	N-Ethyl-3-methylaniline	102-27-2	CCNc1cccc(C)c1	1
999	4-Isopropylaniline	99-88-7	CC(C)c1ccc(N)cc1	1
1000	N-Ethyl-p-toluidine	622-57-1	CCNc1ccc(C)cc1	1
1001	2-Isopropylaniline	643-28-7	CC(C)c1ccccc1N	1
1002	2-Propylaniline	1821-39-2	CCCc1ccccc1N	1
1003	4-Propylaniline	2696-84-6	CCCc1ccc(N)cc1	1
1004	4-Tert-Butylpyridine	3978-81-2	CC(C)(C)c1ccncc1	1
1005	6-Ethyl-o-toluidine	24549-06-2	CCc1cccc(C)c1N	1
1006	2,4,6-Trimethylaniline	88-05-1	Cc1cc(C)c(N)c(C)c1	1
1007	CuMylaMine	585-32-0	CC(C)(N)c1ccccc1	1
1008	N-Propylaniline	622-80-0	CCCNc1ccccc1	1
1009	2-Ethylaminotoluene	94-68-8	CCNc1ccccc1C	1
1010	N,N,2-Trimethylbenzenamine	609-72-3	CN(C)c1ccccc1C	1
1011	3-Butylpyridine	539-32-2	CCCCc1cccnc1	1
1012	Dimethylphenylsilane	766-77-8	C[Si](C)c1ccccc1	1
1013	2-Tolylboronic acid	16419-60-6	Cc1ccccc1B(O)O	1
1014	Benzofuroxan	480-96-6	[O-][n+]1onc2ccccc12	1
1015	Tetramethoxymethane	1850-14-2	COC(OC)(OC)OC	1
1016	p-Toluic acid	99-94-5	Cc1ccc(cc1)C(=O)O	1
1017	m-Toluic acid	99-04-7	Cc1cccc(c1)C(=O)O	1
1018	5-Methylsalicylaldehyde	613-84-3	Cc1ccc(O)c(C=O)c1	1
1019	2-Hydroxy-4-methylbenzaldehyde	698-27-1	Cc1ccc(C=O)c(O)c1	1
1020	Anisic aldehyde	123-11-5	COc1ccc(C=O)cc1	1
1021	4'-Hydroxyacetophenone	99-93-4	CC(=O)c1ccc(O)cc1	1
1022	2'-Hydroxyacetophenone	118-93-4	CC(=O)c1ccccc1O	1
1023	3'-Hydroxyacetophenone	121-71-1	CC(=O)c1cccc(O)c1	1
1024	p-Xyloquinone	137-18-8	CC1=CC(=O)C(=CC1=O)C	1
1025	2-Hydroxyacetophenone	582-24-1	OCC(=O)c1ccccc1	1
1026	o-Toluic acid	118-90-1	Cc1ccccc1C(=O)O	1
1027	3-Methoxybenzaldehyde	591-31-1	COc1cccc(C=O)c1	1
1028	o-Anisaldehyde	135-02-4	COc1ccccc1C=O	1
1029	Anthranilamide	88-68-6	NC(=O)c1ccccc1N	1
1030	p-Aminobenzamide	2835-68-9	NC(=O)c1ccc(N)cc1	1
1031	BenzaMidoxiMe	613-92-3	NC(=NO)c1ccccc1	1
1032	N-Phenylurea	64-10-8	NC(=O)Nc1ccccc1	1
1033	Benzoyl hydrazine	613-94-5	NNC(=O)c1ccccc1	1
1034	3-Aminobenzamide	3544-24-9	NC(=O)c1cccc(N)c1	1
1035	N-MethylnicotinaMide	114-33-0	CNC(=O)c1cccnc1	1
1036	1,4-Thioxane-1,1-dioxide	107-61-9	O=S1(=O)CCOCC1	1
1037	2-Phenyl-2-propanol	617-94-7	CC(C)(O)c1ccccc1	1
1038	3-Phenyl-1-propanol	122-97-4	OCCCc1ccccc1	1
1039	4-Ethylbenzyl alcohol	768-59-2	CCc1ccc(CO)cc1	1
1040	2,4-DiMethylbenzyl alcohol	16308-92-2	Cc1ccc(CO)c(C)c1	1
1041	N,N-Dimethyl-1,4-phenylenediamine	99-98-9	CN(C)c1ccc(N)cc1	1
1042	1-Ethyl-1-phenylhydrazine	644-21-3	CCN(N)c1ccccc1	1
1043	TetraMethylsuccinonitrile	3333-52-6	CC(C)(C#N)C(C)(C)C#N	1
1044	2,5-Dimethyl-1,4-benzenediamine	6393-01-7	Cc1cc(N)c(C)cc1N	1
1045	Tetramethylpyrazine	1124-11-4	Cc1nc(C)c(C)nc1C	1
1046	2-Methyl-3-propylpyrazine	15986-80-8	CCCc1nccnc1C	1
1047	N,N-DiMethyl-p-phenylenediaMine dihydrochloride	536-46-9	CNc1ccc(NC)cc1	1
1048	(+)-Dipentene	5989-27-5	CC(=C)C1CCC(=CC1)C	1
1049	α-Terpinene	99-86-5	CC(C)C1=CC=C(C)CC1	1
1050	(1R)-(+)-alpha-Pinene	7785-70-8	CC1=CCC2CC1C2(C)C	1
1051	(1S)-(1)-beta-Pinene	18172-67-3	CC1(C)C2CCC(=C)C1C2	1
1052	Myrcene	123-35-3	CC(=CCCC(=C)C=C)C	1
1053	γ-Terpinene	99-85-4	CC(C)C1=CCC(=CC1)C	1
1054	Isopropyl chloroacetate	105-48-6	CC(C)OC(=O)CCl	1
1055	5-Chlorovaleric acid	1119-46-6	OC(=O)CCCCCl	1
1056	Ethyl 3-chloropropionate	623-71-2	CCOC(=O)CCCl	1
1057	Ethyl 2-chloropropionate	535-13-7	CCOC(=O)C(C)Cl	1
1058	6-Chlorohexanol	2009-83-8	OCCCCCCCl	1
1059	1-Bromo-2,3-epoxypropane	3132-64-7	BrCC1CO1	1
1060	Bromoacetone	598-31-2	CC(=O)CBr	1
1061	1-Bromobutane	109-65-9	CCCCBr	1
1062	8-Azahypoxanthine	2683-90-1	O=C1N=CN=C2NNN=C12	1
1063	Salicylaldoxime	94-67-7	ON=Cc1ccccc1O	1
1064	3-Aminobenzoic acid	99-05-8	Nc1cccc(c1)C(=O)O	1
1065	4-Hydroxybenzamide	619-57-8	NC(=O)c1ccc(O)cc1	1
1066	Methyl isonicotinate	2459-09-8	COC(=O)c1ccncc1	1
1067	Benzohydroxamic acid	495-18-1	ONC(=O)c1ccccc1	1
1068	Methyl nicotinate	93-60-7	COC(=O)c1cccnc1	1
1069	6-Methyl-2-pyridinecarboxylic acid	934-60-1	Cc1cccc(n1)C(=O)O	1
1070	Methyl picolinate	2459-07-6	COC(=O)c1ccccn1	1
1071	Nicotinic acid hydrazide	553-53-7	NNC(=O)c1cccnc1	1
1072	2-Picolinyl hydrazide	1452-63-7	NNC(=O)c1ccccn1	1
1073	2-Methoxy-5-methylaniline	120-71-8	COc1ccc(C)cc1N	1
1074	Phenetidine	156-43-4	CCOc1ccc(N)cc1	1
1075	6-AMino-2,4-xylenol	41458-65-5	Cc1cc(C)c(O)c(N)c1	1
1076	2-(4-Aminophenyl)ethanol	104-10-9	Nc1ccc(CCO)cc1	1
1077	3-Pyridinepropanol	2859-67-8	OCCCc1cccnc1	1
1078	3-Dimethylaminophenol	99-07-0	CN(C)c1cccc(O)c1	1
1079	4-AMino-2,3-xylenol	3096-69-3	Cc1c(C)c(O)ccc1N	1
1080	2-Methyl-4-methoxybenzenamine	102-50-1	COc1ccc(N)c(C)c1	1
1081	o-Phenetidine	94-70-2	CCOc1ccccc1N	1
1082	Tyramine	51-67-2	NCCc1ccc(O)cc1	1
1083	4-Amino-3,5-xylenol	3096-70-6	Cc1cc(O)cc(C)c1N	1
1084	4-Pyridinepropanol	2629-72-3	OCCCc1ccncc1	1
1085	2-Anilinoethanol	122-98-5	OCCNc1ccccc1	1
1086	3-Acetyl-2,4-dimethylpyrrole	2386-25-6	CC(=O)c1c(C)c[nH]c1C	1
1087	4-Chlorobenzonitrile	623-03-0	Clc1ccc(cc1)C#N	1
1088	3-Chlorobenzonitrile	766-84-7	Clc1cccc(c1)C#N	1
1089	2-Chlorobenzonitrile	873-32-5	Clc1ccccc1C#N	1
1090	3-Hydroxyphenylboronic acid	87199-18-6	OB(O)c1cccc(O)c1	1
1091	4-Hydroxybenzoic acid	99-96-7	OC(=O)c1ccc(O)cc1	1
1092	2,4-Dihydroxybenzaldehyde	95-01-2	Oc1ccc(C=O)c(O)c1	1
1093	3-Hydroxybenzoic acid	99-06-9	OC(=O)c1cccc(O)c1	1
1094	Protocatechualdehyde	139-85-5	Oc1ccc(C=O)cc1O	1
1095	2,3-Dihydroxybenzaldehyde	24677-78-9	Oc1cccc(C=O)c1O	1
1096	2,5-Dihydroxybenzaldehyde	1194-98-5	Oc1ccc(O)c(C=O)c1	1
1097	Furylacrylic acid	539-47-9	OC(=O)C=Cc1occc1	1
1098	2-Aminonicotinic acid	5345-47-1	Nc1ncccc1C(=O)O	1
1099	3-HydroxypicolinaMide	933-90-4	NC(=O)c1ncccc1O	1
1100	6-Aminonicotinic acid	3167-49-5	Nc1ccc(cn1)C(=O)O	1
1101	4-Fluoroacetophenone	403-42-9	CC(=O)c1ccc(F)cc1	1
1102	2-Methoxy-4-methylphenol	93-51-6	COc1cc(C)ccc1O	1
1103	2-Methoxy-5-Methylphenol	1195-09-1	COc1ccc(C)cc1O	1
1104	4-Ethylresorcinol	2896-60-8	CCc1ccc(O)cc1O	1
1105	2-Phenoxyethanol	122-99-6	OCCOc1ccccc1	1
1106	1,4-Dimethoxybenzene	150-78-7	COc1ccc(OC)cc1	1
1107	4-Hydroxyphenethyl alcohol	501-94-0	OCCc1ccc(O)cc1	1
1108	2,3-Dimethylhydroquinone	608-43-5	Cc1c(C)c(O)ccc1O	1
1109	4-Ethoxyphenol	622-62-8	CCOc1ccc(O)cc1	1
1110	4-Methoxybenzyl alcohol	105-13-5	COc1ccc(CO)cc1	1
1111	3-Ethoxyphenol	621-34-1	CCOc1cccc(O)c1	1
1112	m-Anisyl alcohol	6971-51-3	COc1cccc(CO)c1	1
1113	Diethyl sulfite	623-81-4	CCOS(=O)OCC	1
1114	Isopropyl Methanesulfonate	926-06-7	CC(C)OS(=O)(=O)C	1
1115	Thiobenzoic acid	98-91-9	SC(=O)c1ccccc1	1
1116	Thionicotinamide	4621-66-3	NC(=S)c1cccnc1	1
1117	2-PyridinethioaMide	5346-38-3	NC(=S)c1ccccn1	1
1118	Thioisonicotinamide	2196-13-6	NC(=S)c1ccncc1	1
1119	Isophorone	78-59-1	CC1=CC(=O)CC(C)(C)C1	1
1120	trans,cis-2,6-Nonadienal	557-48-2	CCC=CCCC=CC=O	1
1121	1-Piperidinepropionitrile	3088-41-3	N#CCCN1CCCCC1	1
1122	3,5-DiMethylbenzenethiol	38360-81-5	Cc1cc(C)cc(S)c1	1
1123	Ethyl Phenyl Sulfide	622-38-8	CCSc1ccccc1	1
1124	1-Decyne	764-93-2	CCCCCCCCC#C	1
1125	1,9-Decadiene	1647-16-1	C=CCCCCCCC=C	1
1126	2-Chlorostyrene	2039-87-4	Clc1ccccc1C=C	1
1127	4-Chlorostyrene	1073-67-2	Clc1ccc(C=C)cc1	1
1128	3-Chlorostyrene	2039-85-2	Clc1cccc(C=C)c1	1
1129	3-Bromo-1-propanol	627-18-9	OCCCBr	1
1130	1-Bromo-2-methoxyethane	6482-24-2	COCCBr	1
1131	Nicotinic acid N-oxide	2398-81-4	OC(=O)c1ccc[n+]([O-])c1	1
1132	2-Hydroxynicotinic acid	609-71-2	OC(=O)C1=CC=CNC1=O	1
1133	3-Hydroxypicolinic acid	874-24-8	OC(=O)c1ncccc1O	1
1134	Pyridine-4-carboxylic acid N-oxide	13602-12-5	OC(=O)c1cc[n+]([O-])cc1	1
1135	2-Hydroxy-5-pyridinecarboxylic acid	5006-66-6	OC(=O)c1ccc(O)nc1	1
1136	2-Amino-5-nitropyridine	4214-76-0	Nc1ccc(cn1)[N+](=O)[O-]	1
1137	3-Aminopyrazine-2-carboxylic acid	5424-01-1	Nc1nccnc1C(=O)O	1
1138	2-Amino-3-nitropyridine	4214-75-9	Nc1ncccc1[N+](=O)[O-]	1
1139	5-Amino-2-methoxyphenol	1687-53-2	COc1ccc(N)cc1O	1
1140	2,6-Dimethoxypyridine	6231-18-1	COc1cccc(OC)n1	1
1141	Ethyl pyrrole-2-carboxylate	2199-43-1	CCOC(=O)c1ccc[nH]1	1
1142	4-Amino-5-Hydroxymethyl-2-methylpyrimidine	73-67-6	Cc1ncc(CO)c(N)n1	1
1143	Thionicotinic Acid	51087-03-7	OC(=S)c1cccnc1	1
1144	N-Thionylaniline	1122-83-4	O=S=Nc1ccccc1	1
1145	N-Vinylcaprolactam	2235-00-9	C=CN1CCCCCC1=O	1
1146	4-(Methylmercapto)aniline	104-96-1	CSc1ccc(N)cc1	1
1147	3-(Methylthio)aniline	1783-81-9	CSc1cccc(N)c1	1
1148	2-(Methylthio)aniline	2987-53-3	CSc1ccccc1N	1
1149	trans-Decahydroquinoline	767-92-0	C1CCC2NCCCC2C1	1
1150	Nonanenitrile	2243-27-8	CCCCCCCCC#N	1
1151	2,5-Dihydroxy-1,4-benzoquinone	615-94-1	OC1=CC(=O)C(=CC1=O)O	1
1152	Coumalic acid	500-05-0	OC(=O)C1=COC(=O)C=C1	1
1153	4-Nitropyridine N-oxide	1124-33-0	[O-][N+](=O)c1cc[n+]([O-])cc1	1
1154	3-Hydroxy-2-nitropyridine	15128-82-2	Oc1cccnc1[N+](=O)[O-]	1
1155	2-Amino-5-nitropyrimidine	3073-77-6	Nc1ncc(cn1)[N+](=O)[O-]	1
1156	4-Fluorobenzoic acid	456-22-4	OC(=O)c1ccc(F)cc1	1
1157	3-Fluorobenzoic acid	455-38-9	OC(=O)c1cccc(F)c1	1
1158	2-Fluorobenzoic acid	445-29-4	OC(=O)c1ccccc1F	1
1159	2-Methoxyhydroquinone	824-46-4	COc1cc(O)ccc1O	1
1160	3-Methoxycatechol	934-00-9	COc1cccc(O)c1O	1
1161	5-Methoxyresorcinol	2174-64-3	COc1cc(O)cc(O)c1	1
1162	2-Amino-4-methoxy-6-methyl-1,3,5-triazine	1668-54-8	COc1nc(C)nc(N)n1	1
1163	4-(Methylthio)phenol	1073-72-9	CSc1ccc(O)cc1	1
1164	3-Methoxybenzenethiol	15570-12-4	COc1cccc(S)c1	1
1165	4-Methoxy thiophenol	696-63-9	COc1ccc(S)cc1	1
1166	4,6-Dimethyl-2-mercaptopyrimidine	22325-27-5	Cc1cc(C)nc(S)n1	1
1167	trans-2-Nonenal	18829-56-6	CCCCCCC=CC=O	1
1168	3,3,5-Trimethylcyclohexanone	873-94-9	CC1CC(=O)CC(C)(C)C1	1
1169	2,6-Dimethyl-5-heptenal	106-72-9	CC(CCC=C(C)C)C=O	1
1170	4-Chlorobenzaldehyde	104-88-1	Clc1ccc(C=O)cc1	1
1171	3-Chlorobenzaldehyde	587-04-2	Clc1cccc(C=O)c1	1
1172	Phenethyl chloride	622-24-2	ClCCc1ccccc1	1
1173	4-Chloro-1,2-dimethylbenzene	615-60-1	Cc1ccc(Cl)cc1C	1
1174	2-Chloro-1,4-dimethylbenzene	95-72-7	Cc1ccc(C)c(Cl)c1	1
1175	2-Chloro-1,3-dimethylbenzene	6781-98-2	Cc1cccc(C)c1Cl	1
1176	(1-Chloroethyl)benzene	672-65-1	CC(Cl)c1ccccc1	1
1177	1,5-Dichloropentane	628-76-2	ClCCCCCCl	1
1178	5-Nitrofurfural	698-63-5	[O-][N+](=O)c1oc(C=O)cc1	1
1179	2-IsocyanatoethylAcrylate	13641-96-8	C=CC(=O)OCCN=C=O	1
1180	1,2-Dimethyl-5-nitroimidazole	551-92-8	Cc1ncc([N+](=O)[O-])n1C	1
1181	3,5-Dimethyl-4-nitro-1H-pyrazole	14531-55-6	Cc1n[nH]c(C)c1[N+](=O)[O-]	1
1182	2-AMinoethyl Hydrogen Sulfate	926-39-6	NCCOS(=O)(=O)O	1
1183	n-Butyl cyanoacetate	5459-58-5	CCCCOC(=O)CC#N	1
1184	3,3-DiMethylglutariMide	1123-40-6	CC1(C)CC(=O)NC(=O)C1	1
1185	oMega-OctalactaM	935-30-8	O=C1CCCCCCCN1	1
1186	2,2,6,6-Tetramethylpiperidine	768-66-1	CC1(C)CCCC(C)(C)N1	1
1187	p-Quinone-4-chloroiMide	637-61-6	ClN=C1C=CC(=O)C=C1	1
1188	2-Chloro-4-methylaniline	615-65-6	Cc1ccc(N)c(Cl)c1	1
1189	2-Chloro-5-methylaniline	95-81-8	Cc1ccc(Cl)c(N)c1	1
1190	3-Chloro-4-methylaniline	95-74-9	Cc1ccc(N)cc1Cl	1
1191	5-Chloro-2-methylaniline	95-79-4	Cc1ccc(Cl)cc1N	1
1192	3-Chloro-2-methylaniline	87-60-5	Cc1c(N)cccc1Cl	1
1193	2-Chloro-6-methylaniline	87-63-8	Cc1cccc(Cl)c1N	1
1194	4-Chloro-N-methylaniline	932-96-7	CNc1ccc(Cl)cc1	1
1195	4-Chloro-3-methylaniline	7149-75-9	Cc1cc(N)ccc1Cl	1
1196	4,5-dihydroxy-4-cyclopentene-1,2,3-trione	488-86-8	OC1=C(O)C(=O)C(=O)C1=O	1
1197	trans,trans-Muconic acid	3588-17-8	OC(=O)C=CC=CC(=O)O	1
1198	(2-Propenyl) 3-oxobutanoate	1118-84-9	CC(=O)CC(=O)OCC=C	1
1199	N-Ethyl-2,3-dioxopiperazine	59702-31-7	CCN1CCNC(=O)C1=O	1
1200	5-Cyanoindole	15861-24-2	N#Cc1ccc2[nH]ccc2c1	1
1201	3,4-Ethylenedioxythiophene	126213-50-1	C1COc2cscc2O1	1
1202	2-Thiophenecarboxylic acid hydrazide	2361-27-5	NNC(=O)c1cccs1	1
1203	Vinyl n-hexanoate	3050-69-9	CCCCCC(=O)OC=C	1
1204	1-Methyl-1-cyclohexanecarboxylic Acid	1123-25-7	CC1(CCCCC1)C(=O)O	1
1205	1,2,7,8-diepoxyoctane	2426-07-5	C(CCC1CO1)CC2CO2	1
1206	Isobutyl methacrylate	97-86-9	CC(C)COC(=O)C(=C)C	1
1207	tert-Butyl methacrylate	585-07-9	CC(=C)C(=O)OC(C)(C)C	1
1208	Cyclohexylacetic acid	5292-21-7	OC(=O)CC1CCCCC1	1
1209	4-Methylcyclohexanecarboxylic acid	4331-54-8	CC1CCC(CC1)C(=O)O	1
1210	IsoaMyl Acrylate	4245-35-6	CC(C)CCOC(=O)C=C	1
1211	tert-Butyl Crotonate	79218-15-8	CC=CC(=O)OC(C)(C)C	1
1212	3-Cyclopentylpropionic acid	140-77-2	OC(=O)CCC1CCCC1	1
1213	trans-2-Hexenyl acetate	2497-18-9	CCCC=CCOC(=O)C	1
1214	1-Methylnaphthalene	90-12-0	Cc1cccc2ccccc12	1
1215	2-Methylnaphthalene	91-57-6	Cc1ccc2ccccc2c1	1
1216	3-(Trimethylsilyl) propiolic acid	5683-31-8	C[Si](C)(C)C#CC(=O)O	1
1217	2-Nonanone	821-55-6	CCCCCCCC(=O)C	1
1218	1-Nonanal	124-19-6	CCCCCCCCC=O	1
1219	1,3-Benzenedithiol	626-04-0	Sc1cccc(S)c1	1
1220	1,2-Benzenedithiol	17534-15-5	Sc1ccccc1S	1
1221	6-Chloro-M-cresol	615-74-7	Cc1ccc(Cl)c(O)c1	1
1222	2-Chloro-p-cresol	6640-27-3	Cc1ccc(O)c(Cl)c1	1
1223	4-Chloro-1,3-benzenediamine	5131-60-2	Nc1ccc(Cl)c(N)c1	1
1224	4-Chlorophenylhydrazine hydrochloride	1073-70-7	NNc1ccc(Cl)cc1	1
1225	4-Chloro-1,2-diaminobenzene	95-83-0	Nc1ccc(Cl)cc1N	1
1226	2-Chloro-1,4-diaminobenzene	615-66-7	Nc1ccc(N)c(Cl)c1	1
1227	Dichloroacetic acid methyl ester	116-54-1	COC(=O)C(Cl)Cl	1
1228	2,2'-Dichlorodiethyl ether	111-44-4	ClCCOCCCl	1
1229	1,2-Dichloro-2-ethoxyethane	623-46-1	CCOC(Cl)CCl	1
1230	2-Aminobarbituricacid	118-78-5	NC1C(=O)NC(=O)NC1=O	1
1231	4-Methylthiazole-5-carboxylic acid	20485-41-0	Cc1ncsc1C(=O)O	1
1232	7-Methylquinoline	612-60-2	Cc1ccc2cccnc2c1	1
1233	6-Methylquinoline	91-62-3	Cc1ccc2ncccc2c1	1
1234	8-Methylquinoline	611-32-5	Cc1cccc2cccnc12	1
1235	Lepidine	491-35-0	Cc1ccnc2ccccc12	1
1236	3-Methylquinoline	612-58-8	Cc1cnc2ccccc2c1	1
1237	1-methyl isoquinoline	1721-93-3	Cc1nccc2ccccc12	1
1238	5-(2-Hydroxyethyl)-4-methylthiazole	137-00-8	Cc1ncsc1CCO	1
1239	n-OctanaMide	629-01-6	CCCCCCCC(=O)N	1
1240	4-IsobutylMorpholine	10315-98-7	CC(C)CN1CCOCC1	1
1241	N-ButylMorpholine	1005-67-0	CCCCN1CCOCC1	1
1242	1-Bromo-2-chloroethane	107-04-0	ClCCBr	1
1243	2-Amino-5-chlorophenol	28443-50-7	Nc1ccc(Cl)cc1O	1
1244	2-Chloro-6-methoxypyridine	17228-64-7	COc1cccc(Cl)n1	1
1245	2-Amino-4-chloro-6-methylpyrimidine	5600-21-5	Cc1cc(Cl)nc(N)n1	1
1246	L-Lactide	4511-42-6	CC1OC(=O)C(C)OC1=O	1
1247	trans-3-Hexenedioic Acid	4436-74-2	OC(=O)CC=CCC(=O)O	1
1248	Isopropyl acetoacetate	542-08-5	CC(C)OC(=O)CC(=O)C	1
1249	4-Hydroxybutyl acrylate	2478-10-6	OCCCCOC(=O)C=C	1
1250	Ethyl propionylacetate	4949-44-4	CCOC(=O)CC(=O)CC	1
1251	2-hydroxycyclohexane-1-carboxylic acid	609-69-8	OC1CCCCC1C(=O)O	1
1252	Ethyl 3-ethoxyacrylate	1001-26-9	CCOC=CC(=O)OCC	1
1253	2-Naphthol	135-19-3	Oc1ccc2ccccc2c1	1
1254	4-Phenyl-3-butyn-2-one	1817-57-8	CC(=O)C#Cc1ccccc1	1
1255	AdipaMide	628-94-4	NC(=O)CCCCC(=O)N	1
1256	3-Aminoquinoline	580-17-6	Nc1cnc2ccccc2c1	1
1257	4-PhenyliMidazole	670-95-1	c1ccc(cc1)c2c[nH]cn2	1
1258	1-Phenylpyrazole	1126-00-7	c1ccc(cc1)n2cccn2	1
1259	1-Phenylimidazole	7164-98-9	c1ccc(cc1)n2ccnc2	1
1260	5-Methylquinoxaline	13708-12-8	Cc1cccc2nccnc12	1
1261	5-Aminoquinoline	611-34-7	Nc1cccc2ncccc12	1
1262	2-Methylquinoxaline	7251-61-8	Cc1cnc2ccccc2n1	1
1263	8-Aminoquinoline	578-66-5	Nc1cccc2cccnc12	1
1264	6-Aminoquinoline	580-15-4	Nc1ccc2ncccc2c1	1
1265	Quinolin-2-amine	580-22-3	Nc1ccc2ccccc2n1	1
1266	5-Aminoisoquinoline	1125-60-6	Nc1cccc2cnccc12	1
1267	4-Isoquinolylamine	23687-25-4	Nc1cncc2ccccc12	1
1268	1-Aminoisoquinoline	1532-84-9	Nc1nccc2ccccc12	1
1269	2-Phenylimidazole	670-96-2	c1ccc(cc1)c2ncc[nH]2	1
1270	Butyl butyrate	109-21-7	CCCCOC(=O)CCC	1
1271	Ethyl caproate	123-66-0	CCCCCC(=O)OCC	1
1272	Isobutyl isobutyrate	97-85-8	CC(C)COC(=O)C(C)C	1
1273	Methyl heptanoate	106-73-0	CCCCCCC(=O)OC	1
1274	Butyl isobutyrate	97-87-0	CCCCOC(=O)C(C)C	1
1275	2,2,4,4-tetramethyl-1,3-cyclobutanediol	3010-96-6	CC1(C)C(O)C(C)(C)C1O	1
1276	1-Nonanol	143-08-8	CCCCCCCCCO	1
1277	3,5,5-Trimethyl-1-hexanol	3452-97-9	CC(CCO)CC(C)(C)C	1
1278	Trichloroacetonitrile	545-06-2	ClC(Cl)(Cl)C#N	1
1279	4-Chlororesorcinol	95-88-5	Oc1ccc(Cl)c(O)c1	1
1280	Chlorohydroquinone	615-67-8	Oc1ccc(O)c(Cl)c1	1
1281	3-Chlorocatechol	4018-65-9	Oc1cccc(Cl)c1O	1
1282	3-Chloro-6-Methoxypyridazine	1722-10-7	COc1ccc(Cl)nn1	1
1283	4-Chloro-2,6-diaminopyrimidine	156-83-2	Nc1cc(Cl)nc(N)n1	1
1284	2-Chloro-6-fluorotoluene	443-83-4	Cc1c(F)cccc1Cl	1
1285	1-Chloro-2-octyne	51575-83-8	CCCCCC#CCCl	1
1286	2-Amino-5-nitrothiazole	121-66-4	Nc1ncc(s1)[N+](=O)[O-]	1
1287	4-acetylbenzonitrile	1443-80-7	CC(=O)c1ccc(cc1)C#N	1
1288	3-Hydroxyquinoline	580-18-7	Oc1cnc2ccccc2c1	1
1289	5-Hydroxyquinoline	578-67-6	O=C1C=CC=C2NC=CC=C12	1
1290	7-Hydroxyquinoline	580-20-1	O=C1C=CC2=CC=CNC2=C1	1
1291	Benzoylacetonitrile	614-16-4	O=C(CC#N)c1ccccc1	1
1292	6-Hydroxyquinoline	580-16-5	Oc1ccc2ncccc2c1	1
1293	4-Hydroxyquinoline	611-36-9	O=C1C=CNc2ccccc12	1
1294	5-Hydroxyisoquinoline	2439-04-5	Oc1cccc2cnccc12	1
1295	Indole-3-carboxaldehyde	487-89-8	O=Cc1c[nH]c2ccccc12	1
1296	3-Acetylbenzonitrile	6136-68-1	CC(=O)c1cccc(c1)C#N	1
1297	6-Aminoquinoxaline	6298-37-9	Nc1ccc2nccnc2c1	1
1298	4-Phenylbutyronitrile	2046-18-6	N#CCCCc1ccccc1	1
1299	1,2,3-trichloropropene	96-19-5	ClCC(=CCl)Cl	1
1300	5-Chloro-2,3-pyridinediol	53233-89-9	OC1=CC(=CNC1=O)Cl	1
1301	2-Amino-6-chloro-4-pyrimidinol	1194-21-4	Nc1nc(O)cc(Cl)n1	1
1302	Atrazine-desethyl-desisopropyl	3397-62-4	Nc1nc(N)nc(Cl)n1	1
1303	3-Chloro-4-fluoroaniline	367-21-5	Nc1ccc(F)c(Cl)c1	1
1304	Ethyl 1,1,2,2-tetrafluoroethyl ether	512-51-6	CCOC(F)(F)C(F)F	1
1305	1,3-Acetonedicarboxylic acid	542-05-2	OC(=O)CC(=O)CC(=O)O	1
1306	2-Ketoglutaric acid	328-50-7	OC(=O)CCC(=O)C(=O)O	1
1307	Adipic acid	124-04-9	OC(=O)CCCCC(=O)O	1
1308	Diethyl oxalate	95-92-1	CCOC(=O)C(=O)OCC	1
1309	2,2-Dimethylsuccinic acid	597-43-3	CC(C)(CC(=O)O)C(=O)O	1
1310	3-Methylglutaric acid	626-51-7	CC(CC(=O)O)CC(=O)O	1
1311	2-Methylglutaric Acid	18069-17-5	CC(CCC(=O)O)C(=O)O	1
1312	Isopropylmalonic acid	601-79-6	CC(C)C(C(=O)O)C(=O)O	1
1313	Phenylpropiolic acid	637-44-5	OC(=O)C#Cc1ccccc1	1
1314	5-Hydroxyquinoxaline	17056-99-4	Oc1cccc2nccnc12	1
1315	4-Hydroxyquinazoline	491-36-1	Oc1ncnc2ccccc12	1
1316	4-CyanobenzaMide	3034-34-2	NC(=O)c1ccc(cc1)C#N	1
1317	2-CyanobenzaMide	17174-98-0	NC(=O)c1ccccc1C#N	1
1318	1(2H)-Phthalazinone	119-39-1	O=C1NN=Cc2ccccc12	1
1319	2-Quinoxalinone	1196-57-2	O=C1Nc2ccccc2N=C1	1
1320	2,4-Difluorobenzenethiol	1996-44-7	Fc1ccc(S)c(F)c1	1
1321	Fluoronaphthalene	321-38-0	Fc1cccc2ccccc12	1
1322	Benzalacetone	122-57-6	CC(=O)C=Cc1ccccc1	1
1323	alpha-Methylcinnamaldehyde	101-39-3	CC(=Cc1ccccc1)C=O	1
1324	4-(DiMethylaMino)benzonitrile	1197-19-9	CN(C)c1ccc(cc1)C#N	1
1325	2-Phenyl-2-imidazoline	936-49-2	C1CN=C(N1)c2ccccc2	1
1326	3-Anilinopropionitrile	1075-76-9	N#CCCNc1ccccc1	1
1327	2,2,4-Trimethyl-1,3-pentanediol	144-19-4	CC(C)C(O)C(C)(C)CO	1
1328	2,4,6-TriMethylstyrene	769-25-5	Cc1cc(C)c(C=C)c(C)c1	1
1329	Diallyldisulfide	2179-57-9	C=CCSSCC=C	1
1330	1-Mercaptooctane	111-88-6	CCCCCCCCS	1
1331	Hexamethyldisilane	1450-14-2	C[Si](C)(C)[Si](C)(C)C	1
1332	3-Chloro-4-fluorophenol	2613-23-2	Oc1ccc(F)c(Cl)c1	1
1333	2-Chloro-5-thiophenecarboxaldehyde	7283-96-7	Clc1ccc(C=O)s1	1
1334	4-Bromopyrazole	2075-45-8	Brc1cn[nH]c1	1
1335	4-Bromo-1H-imidazole	2302-25-2	Brc1c[nH]cn1	1
1336	1,4-Dichlorobenzene	106-46-7	Clc1ccc(Cl)cc1	1
1337	1-Methyl-3-nitro-1-nitrosoguanidine	70-25-7	CN(N=O)C(=N)N[N+](=O)[O-]	1
1338	2,4,6-Trifluoroaniline	363-81-5	Nc1c(F)cc(F)cc1F	1
1339	3-Trifluoromethylpyridine	3796-23-4	FC(F)(F)c1cccnc1	1
1340	N-Methyliminodiacetic acid	4408-64-4	CN(CC(=O)O)CC(=O)O	1
1341	Isatin	91-56-5	O=C1Nc2ccccc2C1=O	1
1342	4-Cyanobenzoic acid	619-65-8	OC(=O)c1ccc(cc1)C#N	1
1343	3-Cyanobenzoic acid	1877-72-1	OC(=O)c1cccc(c1)C#N	1
1344	3,4-Dihydro-4-oxo-1,2,3-benzotriazine	90-16-4	O=C1NN=Nc2ccccc12	1
1345	6-Fluoroquinoline	396-30-5	Fc1ccc2ncccc2c1	1
1346	3,5-Dimethyl-4-hydroxybenzonitrile	4198-90-7	Cc1cc(cc(C)c1O)C#N	1
1347	5-Methoxyindole	1006-94-6	COc1ccc2[nH]ccc2c1	1
1348	4-Methoxyindole	4837-90-5	COc1cccc2[nH]ccc12	1
1349	7-Methoxy-1H-indole	3189-22-8	COc1cccc2cc[nH]c12	1
1350	4-Methoxybenzyl cyanide	104-47-2	COc1ccc(CC#N)cc1	1
1351	4-Ethoxybenzonitrile	25117-74-2	CCOc1ccc(cc1)C#N	1
1352	N-PhenylacrylaMide	2210-24-4	C=CC(=O)Nc1ccccc1	1
1353	2,5-Dimethylbenzoxazole	5676-58-4	Cc1ccc2oc(C)nc2c1	1
1354	3-Phenoxypropionitrile	3055-86-5	N#CCCOc1ccccc1	1
1355	2-Methoxyphenylacetonitrile	7035-03-2	COc1ccccc1CC#N	1
1356	N,N-Dimethyformamide diethy acetal	1188-33-6	CCOC(OCC)N(C)C	1
1357	1,2,3,4-Tetrahydro-1-naphthylamine	2217-40-5	NC1CCCc2ccccc12	1
1358	5,6,7,8-Tetrahydro-1-naphthylamine	2217-41-6	Nc1cccc2CCCCc12	1
1359	3,5-Dichloropyridine	2457-47-8	Clc1cncc(Cl)c1	1
1360	2,6-Dichloropyridine	2402-78-0	Clc1cccc(Cl)n1	1
1361	2,5-Dichloropyridine	16110-09-1	Clc1ccc(Cl)nc1	1
1362	4-BroMobutyronitrile	5332-06-9	BrCCCC#N	1
1363	3,4,5-Trifluorophenol	99627-05-1	Oc1cc(F)c(F)c(F)c1	1
1364	2,3,4-Trifluorophenol	2822-41-5	Oc1ccc(F)c(F)c1F	1
1365	4-Nitrobenzonitrile	619-72-7	[O-][N+](=O)c1ccc(cc1)C#N	1
1366	3-Nitrobenzonitrile	619-24-9	[O-][N+](=O)c1cccc(c1)C#N	1
1367	2-Nitrobenzonitrile	612-24-8	[O-][N+](=O)c1ccccc1C#N	1
1368	Ethyl 2-fluoroacetoacetate	1522-41-4	CCOC(=O)C(F)C(=O)C	1
1369	2,2-Bis(hydroxymethyl)butyric acid	10097-02-6	CCC(CO)(CO)C(=O)O	1
1370	trans-Cinnamic acid	140-10-3	OC(=O)C=Cc1ccccc1	1
1371	Vinyl Benzoate	769-78-8	C=COC(=O)c1ccccc1	1
1372	4-Vinylbenzoic acid	1075-49-6	OC(=O)c1ccc(C=C)cc1	1
1373	Atropic acid	492-38-6	OC(=O)C(=C)c1ccccc1	1
1374	3-Cyano-4,6-dimethyl-2-hydroxypyridine	769-28-8	Cc1cc(C)c(C#N)c(O)n1	1
1375	1H-Benzimidazole-2-methanol	4856-97-7	OCc1nc2ccccc2[nH]1	1
1376	Triethyl orthoformate	122-51-0	CCOC(OCC)OCC	1
1377	4-Isopropylbenzaldehyde	122-03-2	CC(C)c1ccc(C=O)cc1	1
1378	Benzylacetone	2550-26-7	CC(=O)CCc1ccccc1	1
1379	Isobutyrophenone	611-70-1	CC(C)C(=O)c1ccccc1	1
1380	5,6,7,8-Tetrahydro-2-naphthol	1125-78-6	Oc1ccc2CCCCc2c1	1
1381	5,6,7,8-Tetrahydro-1-naphthol	529-35-1	Oc1cccc2CCCCc12	1
1382	Mesitaldehyde	487-68-3	Cc1cc(C)c(C=O)c(C)c1	1
1383	Vinyltrimethoxysilane	2768-02-7	CO[Si](OC)(OC)C=C	1
1384	Pentamethylbenzene	700-12-9	Cc1cc(C)c(C)c(C)c1C	1
1385	4-tert-Butyltoluene	98-51-1	Cc1ccc(cc1)C(C)(C)C	1
1386	Allyl Propyl Disulfide	2179-59-1	CCCSSCC=C	1
1387	2-Chloro-1,1,2-trifluoroethyl Methyl Ether	425-87-6	COC(F)(F)C(F)Cl	1
1388	4-Cloromethyl-5-methyl-1,3-dioxol-2-one	80841-78-7	CC1=C(CCl)OC(=O)O1	1
1389	1-Chlorooctane	111-85-3	CCCCCCCCCl	1
1390	3-(Chloromethyl)heptane	123-04-6	CCCCC(CC)CCl	1
1391	3,6-Dichloropyridazine	141-30-0	Clc1ccc(Cl)nn1	1
1392	2,6-Dichloropyrazine	4774-14-5	Clc1cncc(Cl)n1	1
1393	5-Bromo-1-pentene	1119-51-3	BrCCCC=C	1
1394	(Bromomethyl)cyclobutane	17247-58-4	BrCC1CCC1	1
1395	Trifluoromethanesulfonamide	421-85-2	NS(=O)(=O)C(F)(F)F	1
1396	1-nitro-4-vinylbenzene	100-13-0	[O-][N+](=O)c1ccc(C=C)cc1	1
1397	2-Isonitrosoacetophenone	532-54-7	ON=CC(=O)c1ccccc1	1
1398	4-Hydroxy-3-methoxybenzonitrile	4421-08-3	COc1cc(ccc1O)C#N	1
1399	(E)-2-Nitroethenylbenzene	5153-67-3	[O-][N+](=O)C=Cc1ccccc1	1
1400	2H-1,4-Benzoxazin-3(4H)-one	5466-88-6	O=C1COc2ccccc2N1	1
1401	5-Amino-1,3-dihydro-2H-benzimidazol-2-one	95-23-8	Nc1ccc2NC(=O)Nc2c1	1
1402	3-methyl-3H-purin-6-amine	5142-23-4	Cn1cnc(N)c2ncnc12	1
1403	4-Dimethylaminobenzaldehyde	100-10-7	CN(C)c1ccc(C=O)cc1	1
1404	4'-Methylacetanilide	103-89-9	CC(=O)Nc1ccc(C)cc1	1
1405	2-Methylacetanilide	120-66-1	CC(=O)Nc1ccccc1C	1
1406	3'-Methylacetanilide	537-92-8	CC(=O)Nc1cccc(C)c1	1
1407	N,N-Dimethylbenzamide	611-74-5	CN(C)C(=O)c1ccccc1	1
1408	Benzyl isothiocyanate	622-78-6	S=C=NCc1ccccc1	1
1409	4-tert-Butylaniline	769-92-6	CC(C)(C)c1ccc(N)cc1	1
1410	4-sec-Butylaniline	30273-11-1	CCC(C)c1ccc(N)cc1	1
1411	4-AMylpyridine	2961-50-4	CCCCCc1ccncc1	1
1412	N,N-Diethylaniline	91-66-7	CCN(CC)c1ccccc1	1
1413	2,6-Diethylaniline	579-66-8	CCc1cccc(CC)c1N	1
1414	N-Phenyl-n-butylamine	1126-78-9	CCCCNc1ccccc1	1
1415	4-PhenylbutylaMine	13214-66-9	NCCCCc1ccccc1	1
1416	2-Pentylpyridine	2294-76-0	CCCCCc1ccccn1	1
1417	3-tert-Butylaniline	5369-19-7	CC(C)(C)c1cccc(N)c1	1
1418	N,N-Diethylchloroacetamide	2315-36-8	CCN(CC)C(=O)CCl	1
1419	3-Formylphenylboronic acid	87199-16-4	OB(O)c1cccc(C=O)c1	1
1420	2-Formylbenzeneboronic acid	40138-16-7	OB(O)c1ccccc1C=O	1
1421	Pentafluoro-1-propanol	422-05-9	OCC(F)(F)C(F)(F)F	1
1422	1,2,4,5-Tetrafluorobenzene	327-54-8	Fc1cc(F)c(F)cc1F	1
1423	1,2,3,4-Tetrafluorobenzene	551-62-2	Fc1ccc(F)c(F)c1F	1
1424	1,2,3,5-Tetrafluorobenzene	2367-82-0	Fc1cc(F)c(F)c(F)c1	1
1425	4-Formylbenzoic acid	619-66-9	OC(=O)c1ccc(C=O)cc1	1
1426	Benzoylformic acid	611-73-4	OC(=O)C(=O)c1ccccc1	1
1427	3-Carboxybenzaldehyde	619-21-6	OC(=O)c1cccc(C=O)c1	1
1428	2-Carboxybenzaldehyde	119-67-5	OC(=O)c1ccccc1C=O	1
1429	Mercaptosuccinic acid	70-49-5	OC(=O)CC(S)C(=O)O	1
1430	3,4-Dimethylbenzoic acid	619-04-5	Cc1ccc(cc1C)C(=O)O	1
1431	2,3-Dimethylbenzoic acid	603-79-2	Cc1cccc(C(=O)O)c1C	1
1432	Benzyl acetate	140-11-4	CC(=O)OCc1ccccc1	1
1433	Glycidyl phenyl ether	122-60-1	C(Oc1ccccc1)C2CO2	1
1434	4-Ethoxybenzaldehyde	10031-82-0	CCOc1ccc(C=O)cc1	1
1435	4'-Hydroxypropiophenone	70-70-2	CCC(=O)c1ccc(O)cc1	1
1436	Methyl 4-methylbenzoate	99-75-2	COC(=O)c1ccc(C)cc1	1
1437	4'-Hydroxy-2'-Methylacetophenone	875-59-2	CC(=O)c1ccc(O)cc1C	1
1438	1-(2-Hydroxy-5-methylphenyl)ethanone	1450-72-2	CC(=O)c1cc(C)ccc1O	1
1439	3-Phenylpropionic acid	501-52-0	OC(=O)CCc1ccccc1	1
1440	3,5-Dimethylbenzoic acid	499-06-9	Cc1cc(C)cc(c1)C(=O)O	1
1441	2,4-Dimethylbenzoic acid	611-01-8	Cc1ccc(C(=O)O)c(C)c1	1
1442	2,5-Dimethylbenzoic acid	610-72-0	Cc1ccc(C)c(c1)C(=O)O	1
1443	2,6-Dimethylbenzoic acid	632-46-2	Cc1cccc(C)c1C(=O)O	1
1444	(R)-(-)-2-Phenylpropionic acid	7782-26-5	CC(C(=O)O)c1ccccc1	1
1445	4-Ethylbenzoic acid	619-64-7	CCc1ccc(cc1)C(=O)O	1
1446	4-Methylphenylacetic acid	622-47-9	Cc1ccc(CC(=O)O)cc1	1
1447	2-Methylphenylacetic acid	644-36-0	Cc1ccccc1CC(=O)O	1
1448	Methyl o-toluate	89-71-4	COC(=O)c1ccccc1C	1
1449	Methyl 3-methylbenzoate	99-36-5	COC(=O)c1cccc(C)c1	1
1450	2'-Hydroxypropiophenone	610-99-1	CCC(=O)c1ccccc1O	1
1451	2-Ethoxybenzaldehyde	613-69-4	CCOc1ccccc1C=O	1
1452	3-Methylphenylacetic acid	621-36-3	Cc1cccc(CC(=O)O)c1	1
1453	3-Ethoxybenzaldehyde	22924-15-8	CCOc1cccc(C=O)c1	1
1454	N,N-DiMethyl-4-nitrosoaniline	138-89-6	CN(C)c1ccc(cc1)N=O	1
1455	4'-Aminoacetanilide	122-80-5	CC(=O)Nc1ccc(N)cc1	1
1456	N1-(3-Aminophenyl)acetamide	102-28-3	CC(=O)Nc1cccc(N)c1	1
1457	N-EthylnicotinaMide	4314-66-3	CCNC(=O)c1cccnc1	1
1458	N,N-DiMethylnicotinaMide	6972-69-6	CN(C)C(=O)c1cccnc1	1
1459	2-Benzothiazolamine	136-95-8	Nc1nc2ccccc2s1	1
1460	4-Isopropylbenzyl alcohol	536-60-7	CC(C)c1ccc(CO)cc1	1
1461	L-(-)-Perillaldehyde	18031-40-8	CC(=C)C1CCC(=CC1)C=O	1
1462	4-isopropyl-m-cresol	3228-02-2	CC(C)c1ccc(O)cc1C	1
1463	2,4,6-Trimethyl-1,3-phenylenediamine	3102-70-3	Cc1cc(C)c(N)c(C)c1N	1
1464	2-Isobutyl-3-Methylpyrazine	13925-06-9	CC(C)Cc1nccnc1C	1
1465	Hydrazodicarbothioamide	142-46-1	NC(=S)NNC(=S)N	1
1466	EthyltriMethoxysilane	5314-55-6	CC[Si](OC)(OC)OC	1
1467	TriMethylphenylsilane	768-32-1	C[Si](C)(C)c1ccccc1	1
1468	1,6-Hexanedithiol	1191-43-1	SCCCCCCS	1
1469	Propyl disulfide	629-19-6	CCCSSCCC	1
1470	Isopropyl disulfide	4253-89-8	CC(C)SSC(C)C	1
1471	tert-Butyl chloroacetate	107-59-5	CC(C)(C)OC(=O)CCl	1
1472	Butyl 2-chloroacetate	590-02-3	CCCCOC(=O)CCl	1
1473	Ethyl 4-chlorobutyrate	3153-36-4	CCOC(=O)CCCCl	1
1474	1-Bromopentane	110-53-2	CCCCCBr	1
1475	2-Bromopentane	107-81-3	CCCC(C)Br	1
1476	1-Bromo-3-methylbutane	107-82-4	CC(C)CCBr	1
1477	:2-BroMo-2-Methylbutane	507-36-8	CCC(C)(C)Br	1
1478	3-BroMopentane	1809-10-5	CCC(Br)CC	1
1479	2,3,5,6-Tetrafluoropyridine	2875-18-5	Fc1cc(F)c(F)nc1F	1
1480	3-Nitrobenzaldehyde	99-61-6	[O-][N+](=O)c1cccc(C=O)c1	1
1481	4-Nitrobenzaldehyde	555-16-8	[O-][N+](=O)c1ccc(C=O)cc1	1
1482	2-Nitrobenzaldehyde	552-89-6	[O-][N+](=O)c1ccccc1C=O	1
1483	Guanine	73-40-5	NC1=Nc2nc[nH]c2C(=O)N1	1
1484	6-Amino-3,7-dihydro-2H-purin-2-one	3373-53-3	NC1=NC(=O)Nc2nc[nH]c12	1
1485	4-Aminophenylacetic acid	1197-55-3	Nc1ccc(CC(=O)O)cc1	1
1486	2-Amino-6-methylbenzoic acid	4389-50-8	Cc1cccc(N)c1C(=O)O	1
1487	Ethyl picolinate	2524-52-9	CCOC(=O)c1ccccn1	1
1488	4-Methoxybenzamide	3424-93-9	COc1ccc(cc1)C(=O)N	1
1489	Methyl 4-aminobenzoate	619-45-4	COC(=O)c1ccc(N)cc1	1
1490	2-Acetamidophenol	614-80-2	CC(=O)Nc1ccccc1O	1
1491	3-AcetaMidophenol	621-42-1	CC(=O)Nc1cccc(O)c1	1
1492	2-Ethylnitrobenzene	612-22-6	CCc1ccccc1[N+](=O)[O-]	1
1493	Methyl anthranilate	134-20-3	COC(=O)c1ccccc1N	1
1494	N-Methylanthranilic Acid	119-68-6	CNc1ccccc1C(=O)O	1
1495	Ethyl nicotinoate	614-18-6	CCOC(=O)c1cccnc1	1
1496	4-Hydroxyphenylacetamide	17194-82-0	NC(=O)Cc1ccc(O)cc1	1
1497	Methyl 3-aMinobenzoate	4518-10-9	COC(=O)c1cccc(N)c1	1
1498	4-(Aminomethyl)benzoic acid	56-91-7	NCc1ccc(cc1)C(=O)O	1
1499	Ethyl isonicotinate	1570-45-2	CCOC(=O)c1ccncc1	1
1500	4-Amino-3-methylbenzoic acid	2486-70-6	Cc1cc(ccc1N)C(=O)O	1
1501	1-PhenylseMicarbazide	103-03-7	NC(=O)NNc1ccccc1	1
1502	4-Aminobenzohydrazide	5351-17-7	NNC(=O)c1ccc(N)cc1	1
1503	2-AMinobenzoichydrazide	1904-58-1	NNC(=O)c1ccccc1N	1
1504	4-Aminobenzo-2,1,3-thiadiazole	767-64-6	Nc1cccc2nsnc12	1
1505	N-(3-Hydroxypropyl)aniline	31121-11-6	OCCCNc1ccccc1	1
1506	N-Benzylethanolamine	104-63-2	OCCNCc1ccccc1	1
1507	4-(DiMethylaMino)benzyl Alcohol	1703-46-4	CN(C)c1ccc(CO)cc1	1
1508	3-Ethylamino-4-methylphenol	120-37-6	CCNc1cc(O)ccc1C	1
1509	N-(2-Hydroxyethyl)-N-methylaniline	93-90-3	CN(CCO)c1ccccc1	1
1510	4-Chlorobenzyl cyanide	140-53-4	Clc1ccc(CC#N)cc1	1
1511	2-Chlorobenzyl cyanide	2856-63-5	Clc1ccccc1CC#N	1
1512	3-Chlorobenzyl cyanide	1529-41-5	Clc1cccc(CC#N)c1	1
1513	4-Methoxyphenylboronic acid	5720-07-0	COc1ccc(cc1)B(O)O	1
1514	4-Methylsalicylic acid	50-85-1	Cc1ccc(C(=O)O)c(O)c1	1
1515	3-Hydroxy-4-methylbenzoic acid	586-30-1	Cc1ccc(cc1O)C(=O)O	1
1516	Vanillin	121-33-5	COc1cc(C=O)ccc1O	1
1517	4-Hydroxyphenylacetic acid	156-38-7	OC(=O)Cc1ccc(O)cc1	1
1518	Isovanillin	621-59-0	COc1ccc(C=O)cc1O	1
1519	Methyl 3-hydroxybenzoate	19438-10-9	COC(=O)c1cccc(O)c1	1
1520	3,5-Dihydroxyacetophenone	51863-60-6	CC(=O)c1cc(O)cc(O)c1	1
1521	Phenoxyacetic acid	122-59-8	OC(=O)COc1ccccc1	1
1522	Methyl salicylate	119-36-8	COC(=O)c1ccccc1O	1
1523	Anisic acid	100-09-4	COc1ccc(cc1)C(=O)O	1
1524	3-Methoxybenzoic acid	586-38-9	COc1cccc(c1)C(=O)O	1
1525	o-Anisic acid	579-75-9	COc1ccccc1C(=O)O	1
1526	3,4-Dihydroxyacetophenone	1197-09-7	CC(=O)c1ccc(O)c(O)c1	1
1527	3-Hydroxy-2-methylbenzoic acid	603-80-5	Cc1c(O)cccc1C(=O)O	1
1528	4-Hydroxy-2-Methyl benzoic acid	578-39-2	Cc1cc(O)ccc1C(=O)O	1
1529	4-Hydroxy-3-Methylbenzoic acid	499-76-3	Cc1cc(ccc1O)C(=O)O	1
1530	5-Methylsalicylic acid	89-56-5	Cc1ccc(O)c(c1)C(=O)O	1
1531	Mandelic acid	611-71-2	OC(C(=O)O)c1ccccc1	1
1532	3-Hydroxyphenyl acetate	102-29-4	CC(=O)Oc1cccc(O)c1	1
1533	2-Hydroxyphenylacetic acid	614-75-5	OC(=O)Cc1ccccc1O	1
1534	3-Hydroxyphenylacetic acid	621-37-4	OC(=O)Cc1cccc(O)c1	1
1535	2-Hydroxy-5-methoxybenzaldehyde	672-13-9	COc1ccc(O)c(C=O)c1	1
1536	3-Hydroxyphenylurea	701-82-6	NC(=O)Nc1cccc(O)c1	1
1537	4-Hydrazinobenzoic acid	619-67-0	NNc1ccc(cc1)C(=O)O	1
1538	3,5-Diaminobenzoic acid	535-87-5	Nc1cc(N)cc(c1)C(=O)O	1
1539	4-Hydroxybenzhydrazide	5351-23-5	NNC(=O)c1ccc(O)cc1	1
1540	3-Pyridinecarboxylic acid N-hydroxymethylamide	3569-99-1	OCNC(=O)c1cccnc1	1
1541	2-Methyl-5-nitroaniline	99-55-8	Cc1ccc(cc1N)[N+](=O)[O-]	1
1542	2-Methyl-3-nitroaniline	603-83-8	Cc1c(N)cccc1[N+](=O)[O-]	1
1543	2-Methyl-4-nitroaniline	99-52-5	Cc1cc(ccc1N)[N+](=O)[O-]	1
1544	4-Methyl-3-nitroaniline	119-32-4	Cc1ccc(N)cc1[N+](=O)[O-]	1
1545	2-Methyl-6-nitroaniline	570-24-1	Cc1cccc(c1N)[N+](=O)[O-]	1
1546	Salicylhydrazide	936-02-7	NNC(=O)c1ccccc1O	1
1547	Methyl 4-aminopyridine-3-carboxylate	16135-36-7	COC(=O)c1cnccc1N	1
1548	3-Methyl-4-nitroaniline	611-05-2	Cc1cc(N)ccc1[N+](=O)[O-]	1
1549	3,4-Diaminobenzoic acid	619-05-6	Nc1ccc(cc1N)C(=O)O	1
1550	4'-Fluoropropiophenone	456-03-1	CCC(=O)c1ccc(F)cc1	1
1551	4-Propoxyphenol	18979-50-5	CCCOc1ccc(O)cc1	1
1552	p-(2-Methoxyethyl) phenol	56718-71-9	COCCc1ccc(O)cc1	1
1553	3,4-Dimethoxytoluene	494-99-5	COc1ccc(C)cc1OC	1
1554	4-Ethyl-2-methoxyphenol	2785-89-9	CCc1ccc(O)c(OC)c1	1
1555	2,6,6-Trimethyl-2-cyclohexene-1,4-dione	1125-21-9	CC1=CC(=O)CC(C)(C)C1=O	1
1556	Benzaldehyde dimethyl acetal	1125-88-8	COC(OC)c1ccccc1	1
1557	Acenaphthylene	208-96-8	C1=Cc2cccc3cccc1c23	1
1558	2-Methyl-3-isopropoxypyrazine	94089-22-2	CC(C)Oc1nccnc1C	1
1559	(-)-CAMPHOR	464-48-2	CC1(C)C2CCC1(C)C(=O)C2	1
1560	trans,trans-2,4-Decadien-1-al	25152-84-5	CCCCCC=CC=CC=O	1
1561	(+)-thujone	1125-12-8	CC(C)C12CC1C(C)C(=O)C2	1
1562	2-Amino-5-chlorobenzonitrile	5922-60-1	Nc1ccc(Cl)cc1C#N	1
1563	5-ChlorobenziMidazole	4887-82-5	Clc1ccc2[nH]cnc2c1	1
1564	4-Amino-2-chlorobenzonitrile	20925-27-3	Nc1ccc(C#N)c(Cl)c1	1
1565	2-Amino-4-chlorobenzonitrile	38487-86-4	Nc1cc(Cl)ccc1C#N	1
1566	Chloroacetaldehyde diethyl acetal	621-62-5	CCOC(CCl)OCC	1
1567	2-Bromoethyl ethyl ether	592-55-2	CCOCCBr	1
1568	2-Nitro-p-cresol	119-33-5	Cc1ccc(O)c(c1)[N+](=O)[O-]	1
1569	4-Nitrobenzyl alcohol	619-73-8	OCc1ccc(cc1)[N+](=O)[O-]	1
1570	5-Methyl-2-nitrophenol	700-38-9	Cc1ccc(c(O)c1)[N+](=O)[O-]	1
1571	5-Aminosalicylic acid	89-57-6	Nc1ccc(O)c(c1)C(=O)O	1
1572	3-Methyl-4-nitrophenol	2581-34-2	Cc1cc(O)ccc1[N+](=O)[O-]	1
1573	4-Methyl-3-nitrophenol	2042-14-0	Cc1ccc(O)cc1[N+](=O)[O-]	1
1574	2-Methyl-5-nitrophenol	5428-54-6	Cc1ccc(cc1O)[N+](=O)[O-]	1
1575	Salicylhydroxamic acid	89-73-6	ONC(=O)c1ccccc1O	1
1576	3-Methyl-2-nitrophenol	4920-77-8	Cc1cccc(O)c1[N+](=O)[O-]	1
1577	2-Methyl-3-nitrophenol	5460-31-1	Cc1c(O)cccc1[N+](=O)[O-]	1
1578	2-Amino-3-hydroxybenzoic acid	548-93-6	Nc1c(O)cccc1C(=O)O	1
1579	4-Nitro-o-cresol	99-53-6	Cc1cc(ccc1O)[N+](=O)[O-]	1
1580	4-Amino-3-hydroxybenzoic acid	2374-03-0	Nc1ccc(cc1O)C(=O)O	1
1581	Methyl 3-amino-2-pyrazinecarboxylate	16298-03-6	COC(=O)c1nccnc1N	1
1582	4-Nitrophenylhydrazine	100-16-3	NNc1ccc(cc1)[N+](=O)[O-]	1
1583	1,4-Diamino-2-nitrobenzene	5307-14-2	Nc1ccc(N)c(c1)[N+](=O)[O-]	1
1584	4-Nitro-o-phenylenediamine	99-56-9	Nc1ccc(cc1N)[N+](=O)[O-]	1
1585	4-Nitro-1,3-phenylenediamine	5131-58-8	Nc1ccc(c(N)c1)[N+](=O)[O-]	1
1586	2-Nitrophenylhydrazine	3034-19-3	NNc1ccccc1[N+](=O)[O-]	1
1587	2'-Fluoroacetanilide	399-31-5	CC(=O)Nc1ccccc1F	1
1588	3-Fluoroacetanilide	351-28-0	CC(=O)Nc1cccc(F)c1	1
1589	4-Fluoroacetanilide	351-83-7	CC(=O)Nc1ccc(F)cc1	1
1590	2,4-Dimethoxyaniline	2735-04-8	COc1ccc(N)c(OC)c1	1
1591	2,5-Dimethoxyaniline	102-56-7	COc1ccc(OC)c(N)c1	1
1592	3,5-Dimethoxyaniline	10272-07-8	COc1cc(N)cc(OC)c1	1
1593	1-Cyanonaphthalene	86-53-3	N#Cc1cccc2ccccc12	1
1594	Decanenitrile	1975-78-6	CCCCCCCCCC#N	1
1595	2-Chlorobenzoxazole	615-18-9	Clc1oc2ccccc2n1	1
1596	1,1,1-Trifluoro-2,4-pentanedione	367-57-7	CC(=O)CC(=O)C(F)(F)F	1
1597	2,2,2-Trifluoroethyl acrylate	407-47-6	FC(F)(F)COC(=O)C=C	1
1598	2,4-Dihydroxybenzoic acid	89-86-1	OC(=O)c1ccc(O)cc1O	1
1599	2,4,6-Trihydroxybenzaldehyde	487-70-7	Oc1cc(O)c(C=O)c(O)c1	1
1600	2,3,4-Trihydroxybenzaldehyde	2144-08-3	Oc1ccc(C=O)c(O)c1O	1
1601	3,4,5-Trihydroxybenzaldehyde	13677-79-7	Oc1cc(C=O)cc(O)c1O	1
1602	3,4-Dihydroxybenzoic acid	99-50-3	OC(=O)c1ccc(O)c(O)c1	1
1603	2,6-Dihydroxybenzoic acid	303-07-1	OC(=O)c1c(O)cccc1O	1
1604	3,5-Dihydroxybenzoic acid	99-10-5	OC(=O)c1cc(O)cc(O)c1	1
1605	2,5-Dihydroxybenzoic acid	490-79-9	OC(=O)c1cc(O)ccc1O	1
1606	2,3-Dihydroxybenzoic acid	303-38-8	OC(=O)c1cccc(O)c1O	1
1607	2-Amino-5-nitrophenol	121-88-0	Nc1ccc(cc1O)[N+](=O)[O-]	1
1608	2-Methoxy-5-nitropyridine	5446-92-4	COc1ccc(cn1)[N+](=O)[O-]	1
1609	2-Amino-4-nitrophenol	99-57-0	Nc1cc(ccc1O)[N+](=O)[O-]	1
1610	2-Amino-3-nitrophenol	603-85-0	Nc1c(O)cccc1[N+](=O)[O-]	1
1611	4-Amino-3-nitrophenol	610-81-1	Nc1ccc(O)cc1[N+](=O)[O-]	1
1612	Acipimox	51037-30-0	Cc1cnc(c[n+]1[O-])C(=O)O	1
1613	1-(5-Fluoro-2-hydroxyphenyl)-1-ethanone	394-32-1	CC(=O)c1cc(F)ccc1O	1
1614	Methyl 4-fluorobenzoate	403-33-8	COC(=O)c1ccc(F)cc1	1
1615	4-Fluorophenylacetic acid	405-50-5	OC(=O)Cc1ccc(F)cc1	1
1616	3-Fluorophenylacetic acid	331-25-9	OC(=O)Cc1cccc(F)c1	1
1617	2-Fluorophenylacetic acid	451-82-1	OC(=O)Cc1ccccc1F	1
1618	3,5-Dimethoxyphenol	500-99-2	COc1cc(O)cc(OC)c1	1
1619	3,4-Dihydroxyphenylethanol	10597-60-1	OCCc1ccc(O)c(O)c1	1
1620	3,4-Dihydroxyphenylethanol	91-10-1	COc1cccc(OC)c1O	1
1621	4-Hydroxy-3-methoxybenzyl alcohol	498-00-0	COc1cc(CO)ccc1O	1
1622	3-Hydroxy-4-methoxybenzyl alcohol	4383-06-6	COc1ccc(CO)cc1O	1
1623	2-Hydroxy-3-methoxybenzyl alcohol	4383-05-5	COc1cccc(CO)c1O	1
1624	N,N'-Methylenebisacrylamide	110-26-9	C=CC(=O)NCNC(=O)C=C	1
1625	BenzalMalononitrile	2700-22-3	N#CC(=Cc1ccccc1)C#N	1
1626	4-Mercaptobenzoic acid	1074-36-8	OC(=O)c1ccc(S)cc1	1
1627	3-Mercaptobenzoic acid	4869-59-4	OC(=O)c1cccc(S)c1	1
1628	Thiosalicylic acid	147-93-3	OC(=O)c1ccccc1S	1
1629	Cyclohexyl acrylate	3066-71-5	C=CC(=O)OC1CCCCC1	1
1630	Biphenyl	92-52-4	c1ccc(cc1)c2ccccc2	1
1631	3-Methyl-4-(methylthio)phenol	3120-74-9	CSc1ccc(O)cc1C	1
1632	3-Decyn-1-ol	51721-39-2	CCCCCCC#CCCO	1
1633	Linalool	78-70-6	CC(=CCCC(C)(O)C=C)C	1
1634	Terpinen-4-ol	562-74-3	CC(C)C1(O)CCC(=CC1)C	1
1635	decahydro-2-naphthol	825-51-4	OC1CCC2CCCCC2C1	1
1636	DL-Isoborneol	124-76-5	CC1(C)C2CCC1(C)C(O)C2	1
1637	3-Heptylacrolein	3913-81-3	CCCCCCCC=CC=O	1
1638	Geraniol	106-24-1	CC(=CCCC(=CCO)C)C	1
1639	Isopulegol	7786-67-6	CC1CCC(C(O)C1)C(=C)C	1
1640	2-Hydroxyethyl disulfide	1892-29-1	OCCSSCCO	1
1641	L-Dithiothreitol	16096-97-2	OC(CS)C(O)CS	1
1642	1-Undecene	821-95-4	CCCCCCCCCC=C	1
1643	4'-Chloroacetophenone	99-91-2	CC(=O)c1ccc(Cl)cc1	1
1644	3'-Chloroacetophenone	99-02-5	CC(=O)c1cccc(Cl)c1	1
1645	2'-Chloroacetophenone	2142-68-9	CC(=O)c1ccccc1Cl	1
1646	1-Chloro-3-phenylpropane	104-52-9	ClCCCc1ccccc1	1
1647	Mesityl Chloride	1667-04-5	Cc1cc(C)c(Cl)c(C)c1	1
1648	1,6-Dichlorohexane	2163-00-0	ClCCCCCCCl	1
1649	4-Nitrocatechol	3316-09-4	Oc1ccc(cc1O)[N+](=O)[O-]	1
1650	2-Nitroresorcinol	601-89-8	Oc1cccc(O)c1[N+](=O)[O-]	1
1651	Citrazinic acid	99-11-6	OC(=O)C1=CC(=O)NC(=C1)O	1
1652	4-Fluoro-2-nitrotoluene	446-10-6	Cc1ccc(F)cc1[N+](=O)[O-]	1
1653	4-AMino-3-fluorobenzoic acid	455-87-8	Nc1ccc(cc1F)C(=O)O	1
1654	3-Fluoro-4-nitrotoluene	446-34-4	Cc1ccc(c(F)c1)[N+](=O)[O-]	1
1655	Ethyl 3-amino-4-pyrazolecarboxylate	6994-25-8	CCOC(=O)c1c[nH]nc1N	1
1656	4-Nitrobenzenethiol	1849-36-1	[O-][N+](=O)c1ccc(S)cc1	1
1657	2-Mercaptonicotinic acid	38521-46-9	OC(=O)C1=CC=CNC1=S	1
1658	N-Acetylcaprolactam	1888-91-1	CC(=O)N1CCCCCC1=O	1
1659	2-Phenylpyridine	1008-89-5	c1ccc(cc1)c2ccccn2	1
1660	4-Phenylpyridine	939-23-1	c1ccc(cc1)c2ccncc2	1
1661	3-Phenylpyridine	1008-88-4	c1ccc(cc1)c2cccnc2	1
1662	Triacetonamine	826-36-8	CC1(C)CC(=O)CC(C)(C)N1	1
1663	2-Chlorobenzamide	609-66-5	NC(=O)c1ccccc1Cl	1
1664	4-Chlorophenethylamine	156-41-2	NCCc1ccc(Cl)cc1	1
1665	Iodoethane	75-03-6	CCI	1
1666	2,5-Furandicarboxylic acid	3238-40-2	OC(=O)c1oc(cc1)C(=O)O	1
1667	Orotic Acid Monohydrate	50887-69-9	OC(=O)C1=CC(=O)NC(=O)N1	1
1668	4,5-Imidazoledicarboxylic acid	570-22-9	OC(=O)c1nc[nH]c1C(=O)O	1
1669	4-Fluoro-3-nitroaniline	364-76-1	Nc1ccc(F)c(c1)[N+](=O)[O-]	1
1670	4-Fluoro-2-nitrobenzeneamine	364-78-3	Nc1ccc(F)cc1[N+](=O)[O-]	1
1671	5-ForMyl-2-thiophenecarboxylic acid	4565-31-5	OC(=O)c1ccc(C=O)s1	1
1672	1-Naphthaldehyde	66-77-3	O=Cc1cccc2ccccc12	1
1673	2-Naphthaldehyde	66-99-9	O=Cc1ccc2ccccc2c1	1
1674	2,2´-Bipyridyl	366-18-7	c1ccc(nc1)c2ccccn2	1
1675	2,4'-Dipyridyl	581-47-5	c1ccc(nc1)c2ccncc2	1
1676	1,3-Phenylenediacetonitrile	626-22-2	N#CCc1cccc(CC#N)c1	1
1677	Hexyl Acrylate	2499-95-8	CCCCCCOC(=O)C=C	1
1678	Cyclohexanepropionic acid	701-97-3	OC(=O)CCC1CCCCC1	1
1679	1,5-DiMethylnaphthalene	571-61-9	Cc1cccc2c(C)cccc12	1
1680	N,N-Dimethylaminopropyl acrylamide	3845-76-9	CN(C)CCCNC(=O)C=C	1
1681	L-Menthol	2216-51-5	CC(C)C1CCC(C)CC1O	1
1682	Decanal	112-31-2	CCCCCCCCCC=O	1
1683	Citronellol	106-22-9	CC(CCO)CCC=C(C)C	1
1684	1,2-Epoxydecane	2404-44-6	CCCCCCCCC1CO1	1
1685	9-Decen-1-ol	13019-22-2	OCCCCCCCCC=C	1
1686	n-Hendecane	1120-21-4	CCCCCCCCCCC	1
1687	4-Chlorophenylboronic acid	1679-18-1	OB(O)c1ccc(Cl)cc1	1
1688	5-Chlorosalicylaldehyde	635-93-8	Oc1ccc(Cl)cc1C=O	1
1689	3-Chloro-4-hydroxybenzaldehyde	2420-16-8	Oc1ccc(C=O)cc1Cl	1
1690	2-Chlorobenzoic acid	118-91-2	OC(=O)c1ccccc1Cl	1
1691	4-Chlorobenzoic acid	74-11-3	OC(=O)c1ccc(Cl)cc1	1
1692	3-Chlorobenzoic acid	535-80-8	OC(=O)c1cccc(Cl)c1	1
1693	2-Phenoxyethyl chloride	622-86-6	ClCCOc1ccccc1	1
1694	4-Chlorophenethylalcohol	1875-88-3	OCCc1ccc(Cl)cc1	1
1695	4-Chloro-3-ethylphenol	14143-32-9	CCc1cc(O)ccc1Cl	1
1696	Bromobenzene	108-86-1	Brc1ccccc1	1
1697	2-Nitro-4-fluorophenol	394-33-2	Oc1ccc(F)cc1[N+](=O)[O-]	1
1698	3-Fluoro-4-nitrophenol	394-41-2	Oc1ccc(c(F)c1)[N+](=O)[O-]	1
1699	2-Fluoro-4-nitrophenol	403-19-0	Oc1ccc(cc1F)[N+](=O)[O-]	1
1700	5-Fluoro-2-nitrophenol	446-36-6	Oc1cc(F)ccc1[N+](=O)[O-]	1
1701	8-Quinolinecarbaldehyde	38707-70-9	O=Cc1cccc2cccnc12	1
1702	2-Quinolinecarboxaldehyde	5470-96-2	O=Cc1ccc2ccccc2n1	1
1703	4-Quinolinecarboxaldehyde	4363-93-3	O=Cc1ccnc2ccccc12	1
1704	Methyl 3-amino-2-thiophenecarboxylate	22288-78-4	COC(=O)c1sccc1N	1
1705	Tranexamic Acid	1197-18-8	NCC1CCC(CC1)C(=O)O	1
1706	2,6-DiMethylquinoline	877-43-0	Cc1ccc2nc(C)ccc2c1	1
1707	2,4-DiMethylquinoline	1198-37-4	Cc1cc(C)c2ccccc2n1	1
1708	6-Chloronicotinic acid	5326-23-8	OC(=O)c1ccc(Cl)nc1	1
1709	2-Chloronicotinic acid	2942-59-8	OC(=O)c1cccnc1Cl	1
1710	6-Chloropicolinic acid	4684-94-0	OC(=O)c1cccc(Cl)n1	1
1711	5-Chloro-2-methoxyaniline	95-03-4	COc1ccc(Cl)cc1N	1
1712	2-Bromopyridine	109-04-6	Brc1ccccn1	1
1713	3-Pyridyl bromide	626-55-1	Brc1cccnc1	1
1714	2,6-Difluorobenzoic acid	385-00-2	OC(=O)c1c(F)cccc1F	1
1715	2,4-Difluorobenzoic acid	1583-58-0	OC(=O)c1ccc(F)cc1F	1
1716	3,5-Difluorobenzoic acid	455-40-3	OC(=O)c1cc(F)cc(F)c1	1
1717	3,4-Difluorobenzoic acid	455-86-7	OC(=O)c1ccc(F)c(F)c1	1
1718	2,5-Difluorobenzoic acid	2991-28-8	OC(=O)c1cc(F)ccc1F	1
1719	2,3-Difluorobenzoic acid	4519-39-5	OC(=O)c1cccc(F)c1F	1
1720	Terebic Acid	79-91-4	CC1(C)OC(=O)CC1C(=O)O	1
1721	1,4-Naphthoquinone	130-15-4	O=C1C=CC(=O)c2ccccc12	1
1722	1,2-Naphthoquinone	524-42-5	O=C1C=Cc2ccccc2C1=O	1
1723	1-Hydroxymethyl-5,5-dimethylhydantoin	116-25-6	CC1(C)N(CO)C(=O)NC1=O	1
1724	2-Ethoxyethyl Methacrylate	2370-63-0	CCOCCOC(=O)C(=C)C	1
1725	Methyl pivaloylacetate	55107-14-7	COC(=O)CC(=O)C(C)(C)C	1
1726	sec-Butyl Acetoacetate	13562-76-0	CCC(C)OC(=O)CC(=O)C	1
1727	Diethylene glycol divinyl ether	764-99-8	C=COCCOCCOC=C	1
1728	Ethyl N-piperazinecarboxylate	120-43-4	CCOC(=O)N1CCNCC1	1
1729	1-Benzylimidazole	4238-71-5	C(c1ccccc1)n2ccnc2	1
1730	3-Methyl-1-phenyl-1H-pyrazole	1128-54-7	Cc1ccn(n1)c2ccccc2	1
1731	1,5-Naphthalenediamine	2243-62-1	Nc1cccc2c(N)cccc12	1
1732	1,8-Diaminonaphthalene	479-27-6	Nc1cccc2cccc(N)c12	1
1733	2,3-dimethyl-quinoxalin	2379-55-7	Cc1nc2ccccc2nc1C	1
1734	2,3-DiaMinonaphthalene	771-97-1	Nc1cc2ccccc2cc1N	1
1735	4-AMino-2-Methylquinoline	6628-04-2	Cc1cc(N)c2ccccc2n1	1
1736	Isoamyl butyrate	106-27-4	CCCC(=O)OCCC(C)C	1
1737	3,5,5-Trimethylhexanoic acid	3302-10-1	CC(CC(=O)O)CC(C)(C)C	1
1738	Pentyl butyrate	540-18-1	CCCCCOC(=O)CCC	1
1739	Butyl Valerate	591-68-4	CCCCOC(=O)CCCC	1
1740	Octanoic hydrazide	6304-39-8	CCCCCCCC(=O)NN	1
1741	Tetrahydrolinalool	78-69-3	CCC(C)(O)CCCC(C)C	1
1742	Decyl alcohol	112-30-1	CCCCCCCCCCO	1
1743	3,7-DiMethyl-octanol	106-21-8	CC(C)CCCC(C)CCO	1
1744	2-Amino-5-diethylaminopentane	140-80-7	CCN(CC)CCCC(C)N	1
1745	2-Chloro-3-nitropyridine	5470-18-8	[O-][N+](=O)c1cccnc1Cl	1
1746	2-Chloro-6-fluorobenzaldehyde	387-45-1	Fc1cccc(Cl)c1C=O	1
1747	4-Chloro-2-Methoxyphenol	16766-30-6	COc1cc(Cl)ccc1O	1
1748	4-Chlorothioanisole	123-09-1	CSc1ccc(Cl)cc1	1
1749	4-Chlorobenzyl Mercaptan	6258-66-8	SCc1ccc(Cl)cc1	1
1750	5-Bromopyrimidine	4595-59-9	Brc1cncnc1	1
1751	2-Bromopyrazine	56423-63-3	Brc1cnccn1	1
1752	2,4-Difluoronitrobenzene	446-35-5	[O-][N+](=O)c1ccc(F)cc1F	1
1753	2,5-Difluoronitrobenzene	364-74-9	[O-][N+](=O)c1cc(F)ccc1F	1
1754	3,5-Difluoronitrobenzene	2265-94-3	[O-][N+](=O)c1cc(F)cc(F)c1	1
1755	5-Cyanophthalide	82104-74-3	O=C1OCc2cc(ccc12)C#N	1
1756	6-Methoxyquinoline	5263-87-6	COc1ccc2ncccc2c1	1
1757	8-Hydroxyquinaldine	826-81-3	Cc1ccc2cccc(O)c2n1	1
1758	4-Methylcarbostyril	607-66-9	CC1=CC(=O)Nc2ccccc12	1
1759	6-Hydroxy-2-Methylquinoline	613-21-8	Cc1ccc2cc(O)ccc2n1	1
1760	3-AMino-2-naphthol	5417-63-0	Nc1cc2ccccc2cc1O	1
1761	5-Amino-1-naphthol	83-55-6	Nc1cccc2c(O)cccc12	1
1762	6-AMino-1-naphthol	23894-12-4	Nc1ccc2c(O)cccc2c1	1
1763	5-AMino-2-naphthol	86-97-5	Nc1cccc2cc(O)ccc12	1
1764	1-Amino-7-naphthol	118-46-7	Nc1cccc2ccc(O)cc12	1
1765	2-Hydrazinoquinoline	15793-77-8	NNc1ccc2ccccc2n1	1
1766	2,3,3-Trimethylindolenine	1640-39-7	CC1=Nc2ccccc2C1(C)C	1
1767	3,6-Dihydroxyphthalonitrile	4733-50-0	Oc1ccc(O)c(C#N)c1C#N	1
1768	1,3-Phenylene Diisocyanate	123-61-5	O=C=Nc1cccc(c1)N=C=O	1
1769	3,3-Dimethylglutaric acid	4839-46-7	CC(C)(CC(=O)O)CC(=O)O	1
1770	Pimelic acid	111-16-0	OC(=O)CCCCCC(=O)O	1
1771	1,2-Propyleneglycol diacetate	623-84-7	CC(COC(=O)C)OC(=O)C	1
1772	2,2-Dimethylglutaric acid	681-57-2	CC(C)(CCC(=O)O)C(=O)O	1
1773	Butylmalonic acid	534-59-8	CCCCC(C(=O)O)C(=O)O	1
1774	Monomethyl adipate	627-91-8	COC(=O)CCCCC(=O)O	1
1775	3-Methyladipic acid	3058-01-3	CC(CCC(=O)O)CC(=O)O	1
1776	1,6-Dihydroxynaphthalene	575-44-0	Oc1ccc2c(O)cccc2c1	1
1777	2,7-Dihydroxynaphthalene	582-17-2	Oc1ccc2ccc(O)cc2c1	1
1778	1,3-Dihydroxynaphthalene	132-86-5	Oc1cc(O)c2ccccc2c1	1
1779	2,3-Dihydroxynaphthalene	92-44-4	Oc1cc2ccccc2cc1O	1
1780	1,5-Dihydroxy naphthalene	83-56-7	Oc1cccc2c(O)cccc12	1
1781	1,7-Dihydroxynaphthalene	575-38-2	Oc1ccc2cccc(O)c2c1	1
1782	2,6-Naphthalenediol	581-43-1	Oc1ccc2cc(O)ccc2c1	1
1783	Methyl Phenylpropiolate	4891-38-7	COC(=O)C#Cc1ccccc1	1
1784	Daminozide	1596-84-5	CN(C)NC(=O)CCC(=O)O	1
1785	2-Cyanoacetanilide	621-03-4	O=C(CC#N)Nc1ccccc1	1
1786	2-Hydroxycaprylic acid	617-73-2	CCCCCCC(O)C(=O)O	1
1787	Tryptamine	61-54-1	NCCc1c[nH]c2ccccc12	1
1788	2-Naphthalenethiol	91-60-1	Sc1ccc2ccccc2c1	1
1789	1-Allyl-3-(2-hydroxyethyl)-2-thiourea	105-81-7	OCCNC(=NCC=C)S	1
1790	4-tert-Butylstyrene	1746-23-2	CC(C)(C)c1ccc(C=C)cc1	1
1791	Cyclohexylbenzene	827-52-1	C1CCC(CC1)c2ccccc2	1
1792	Diethoxy(methyl)vinylsilane	5507-44-8	CCO[Si](C)(OCC)C=C	1
1793	tert-Nonyl Mercaptan	25360-10-5	CCCCCCC(C)(C)S	1
1794	6-(Chloromethyl)uracil	18592-13-7	ClCC1=CC(=O)NC(=O)N1	1
1795	4-Bromo-3-methylpyrazole	13808-64-5	Cc1n[nH]cc1Br	1
1796	Benzyl dichloride	98-87-3	ClC(Cl)c1ccccc1	1
1797	2-Chlorobenzyl chloride	611-19-8	ClCc1ccccc1Cl	1
1798	3-Bromocyclohexene	1521-51-3	BrC1CCCC=C1	1
1799	3-Aminobenzotrifluoride	98-16-8	Nc1cccc(c1)C(F)(F)F	1
1800	4-Aminobenzotrifluoride	455-14-1	Nc1ccc(cc1)C(F)(F)F	1
1801	2-Aminobenzotrifluoride	88-17-5	Nc1ccccc1C(F)(F)F	1
1802	3,3'-IMinodipropionic Acid	505-47-5	OC(=O)CCNCCC(=O)O	1
1803	Indole-4-carboxylic acid	2124-55-2	OC(=O)c1cccc2[nH]ccc12	1
1804	3-Indoleformic acid	771-50-6	OC(=O)c1c[nH]c2ccccc12	1
1805	Indole-5-carboxylic acid	1670-81-1	OC(=O)c1ccc2[nH]ccc2c1	1
1806	N-Methylphthalimide	550-44-7	CN1C(=O)c2ccccc2C1=O	1
1807	2,4-Quinolinediol	86-95-3	OC1=CC(=O)Nc2ccccc12	1
1808	2-Acetoxybenzonitrile	5715-02-6	CC(=O)Oc1ccccc1C#N	1
1809	N-Phenylpiperidine	4096-20-2	C1CCN(CC1)c2ccccc2	1
1810	4-Phenylpiperidine	771-99-3	C1CC(CCN1)c2ccccc2	1
1811	3-Phenyl-piperidine	3973-62-4	C1CNCC(C1)c2ccccc2	1
1812	1,1,1-Trichloroacetone	918-00-3	CC(=O)C(Cl)(Cl)Cl	1
1813	5-Chloro-1-methyl-4-nitroimidazole	4897-25-0	Cn1cnc(c1Cl)[N+](=O)[O-]	1
1814	2,3-Dichloroaniline	608-27-5	Nc1cccc(Cl)c1Cl	1
1815	5-BroMovaleronitrile	5414-21-1	BrCCCCC#N	1
1816	(Trifluoromethoxy)benzene	456-55-3	FC(F)(F)Oc1ccccc1	1
1817	7-Hydroxycoumarin	93-35-6	Oc1ccc2C=CC(=O)Oc2c1	1
1818	4-Hydroxycoumarin	1076-38-6	OC1=CC(=O)Oc2ccccc12	1
1819	Benzofuran-2-carboxylic acid	496-41-3	OC(=O)c1oc2ccccc2c1	1
1820	p-Nitrophenylacetonitrile	555-21-5	[O-][N+](=O)c1ccc(CC#N)cc1	1
1821	2-Nitrophenylacetonitrile	610-66-2	[O-][N+](=O)c1ccccc1CC#N	1
1822	N-AMinophthaliMide	1875-48-5	NN1C(=O)c2ccccc2C1=O	1
1823	Indazole-3-carboxylic acid	4498-67-3	OC(=O)c1n[nH]c2ccccc12	1
1824	2,3-Dihydroxyquinoxaline	15804-19-0	O=C1Nc2ccccc2NC1=O	1
1825	4-Methylcinnamic acid	1866-39-3	Cc1ccc(C=CC(=O)O)cc1	1
1826	3-MethylcinnaMic acid	3029-79-6	Cc1cccc(C=CC(=O)O)c1	1
1827	Benzyl acrylate	2495-35-4	C=CC(=O)OCc1ccccc1	1
1828	2-Methylcinnamic acid	2373-76-4	Cc1ccccc1C=CC(=O)O	1
1829	alpha-Methylcinnamic acid	1199-77-5	CC(=Cc1ccccc1)C(=O)O	1
1830	Butyldiglycol	112-34-5	CCCCOCCOCCO	1
1831	Triethyl orthoacetate	78-39-7	CCOC(C)(OCC)OCC	1
1832	5-tert-butl-3,5-dimethylbenzene	98-19-1	Cc1cc(C)cc(c1)C(C)(C)C	1
1833	1,3,5-Triethylbenzene	102-25-0	CCc1cc(CC)cc(CC)c1	1
1834	Hexamethyldisiloxane	107-46-0	C[Si](C)(C)O[Si](C)(C)C	1
1835	2,2,2-Trichloroacetamide	594-65-0	NC(=O)C(Cl)(Cl)Cl	1
1836	5-Chlorothiophene-2-carboxylic acid	24065-33-6	OC(=O)c1ccc(Cl)s1	1
1837	1-Chloronaphthalene	90-13-1	Clc1cccc2ccccc12	1
1838	1-Chlorononane	2473-01-0	CCCCCCCCCCl	1
1839	2,3-Dichlorophenol	576-24-9	Oc1cccc(Cl)c1Cl	1
1840	3,4-Dichlorophenol	95-77-2	Oc1ccc(Cl)c(Cl)c1	1
1841	2,5-Dichlorophenol	583-78-8	Oc1cc(Cl)ccc1Cl	1
1842	3,5-Dichlorophenol	591-35-5	Oc1cc(Cl)cc(Cl)c1	1
1843	2,4-Dichloro-6-methylpyrimidine	5424-21-5	Cc1cc(Cl)nc(Cl)n1	1
1844	4-Amino-3,5-dichloropyridine	22889-78-7	Nc1c(Cl)cncc1Cl	1
1845	2,4-Dichloro-5-methylpyrimidine	1780-31-0	Cc1cnc(Cl)nc1Cl	1
1846	2,6-Dichloropyridin-3-amine	62476-56-6	Nc1ccc(Cl)nc1Cl	1
1847	3-Bromothiophene	872-31-1	Brc1ccsc1	1
1848	2-Bromothiophene	1003-09-4	Brc1cccs1	1
1849	4H-3,1-Benzoxazine-2,4(1H)-dione	118-48-9	O=C1Nc2ccccc2C(=O)O1	1
1850	N-Hydroxyphthalimide	524-38-9	ON1C(=O)c2ccccc2C1=O	1
1851	5-Nitroindazole	5401-94-5	[O-][N+](=O)c1ccc2[nH]ncc2c1	1
1852	5-Nitrobenzimidazole	94-52-0	[O-][N+](=O)c1ccc2[nH]cnc2c1	1
1853	7-Nitroindazole	2942-42-9	[O-][N+](=O)c1cccc2cn[nH]c12	1
1854	6-Nitroindazole	7597-18-4	[O-][N+](=O)c1ccc2cn[nH]c2c1	1
1855	5-Nitroanthranilonitrile	17420-30-3	Nc1ccc(cc1C#N)[N+](=O)[O-]	1
1856	3-Hydroxy-1,2,3-benzotriazin-4(3H)-one	28230-32-2	ON1N=Nc2ccccc2C1=O	1
1857	4-Azidobenzoic Acid	6427-66-3	OC(=O)c1ccc(cc1)N=N#N	1
1858	6-Dimethylaminopurine	938-55-6	CN(C)c1ncnc2nc[nH]c12	1
1859	Benzoyl isothiocyanate	532-55-8	O=C(N=C=S)c1ccccc1	1
1860	1-[Bis(2-hydroxyethyl)aMino]-2-propanol	6712-98-7	CC(O)CN(CCO)CCO	1
1861	1-(2-Pyridyl)piperazine	34803-66-2	C1CN(CCN1)c2ccccn2	1
1862	2,5-DiMethylbenzothiazole	95-26-1	Cc1ccc2sc(C)nc2c1	1
1863	4-Pentylaniline	33228-44-3	CCCCCc1ccc(N)cc1	1
1864	N,N-Diethyl-p-toluidine	613-48-9	CCN(CC)c1ccc(C)cc1	1
1865	N,N-Diethyl-o-toluidine	606-46-2	CCN(CC)c1ccccc1C	1
1866	N,N-Diethyl-m-toluidine	91-67-8	CCN(CC)c1cccc(C)c1	1
1867	N,N,2,4,6-PentaMethylaniline	13021-15-3	CN(C)c1c(C)cc(C)cc1C	1
1868	8-Chloroquinoline	611-33-6	Clc1cccc2cccnc12	1
1869	6-Chloroquinoline	612-57-7	Clc1ccc2ncccc2c1	1
1870	5-Chloroquinoline	635-27-8	Clc1cccc2ncccc12	1
1871	2-Chloroquinoline	612-62-4	Clc1ccc2ccccc2n1	1
1872	BroModichloroMethane	75-27-4	ClC(Cl)Br	1
1873	2-Amino-4,6-dichloropyrimidine	56-05-3	Nc1nc(Cl)cc(Cl)n1	1
1874	2-Fluorobenzotrifluoride	392-85-8	Fc1ccccc1C(F)(F)F	1
1875	3-Fluorobenzotrifluoride	401-80-9	Fc1cccc(c1)C(F)(F)F	1
1876	4-Fluorobenzotrifluoride	402-44-8	Fc1ccc(cc1)C(F)(F)F	1
1877	4-Nitrophenyl isocyanate	100-28-7	[O-][N+](=O)c1ccc(cc1)N=C=O	1
1878	Methyl 4-formylbenzoate	1571-08-0	COC(=O)c1ccc(C=O)cc1	1
1879	trans-o-CouMaric Acid	614-60-8	OC(=O)C=Cc1ccccc1O	1
1880	4-Hydroxycinnamic acid	501-98-4	OC(=O)C=Cc1ccc(O)cc1	1
1881	4-Acetylbenzoic acid	586-89-0	CC(=O)c1ccc(cc1)C(=O)O	1
1882	3-acetylbenzoic acid	586-42-5	CC(=O)c1cccc(c1)C(=O)O	1
1883	2-Acetylbenzoic acid	577-56-0	CC(=O)c1ccccc1C(=O)O	1
1884	2-Hydroxy-5-Methylisophthalaldehyde	7310-95-4	Cc1cc(C=O)c(O)c(C=O)c1	1
1885	3-Methoxy-1(3H)-isobenzofuranone	4122-57-0	COC1OC(=O)c2ccccc12	1
1886	6-Nitroindoline	19727-83-4	[O-][N+](=O)c1ccc2CCNc2c1	1
1887	Eugenol	97-53-0	COc1cc(CC=C)ccc1O	1
1888	isoeugenol	97-54-1	COc1cc(C=CC)ccc1O	1
1889	3-(p-Tolyl)propionic Acid	1505-50-6	Cc1ccc(CCC(=O)O)cc1	1
1890	2-Benzyl-1,3-dioxolane	101-49-5	C(C1OCCO1)c2ccccc2	1
1891	2,3-Dihydro-2,2-dimethyl-7-benzofuranol	1563-38-8	CC1(C)Cc2cccc(O)c2O1	1
1892	etraMethyl-1,4-benzoquinone	527-17-3	CC1=C(C)C(=O)C(=C(C)C1=O)C	1
1893	4-(4-Hydroxyphenyl)-2-butanone	5471-51-2	CC(=O)CCc1ccc(O)cc1	1
1894	ThyMoquinone	490-91-5	CC(C)C1=CC(=O)C(=CC1=O)C	1
1895	2-tert-Butyl-1,4-benzoquinone	3602-55-9	CC(C)(C)C1=CC(=O)C=CC1=O	1
1896	(R)-(-)-Benzyl glycidyl ether	14618-80-5	C(OCc1ccccc1)C2CO2	1
1897	4-Isopropylbenzoic acid	536-66-3	CC(C)c1ccc(cc1)C(=O)O	1
1898	Phenylacetic acid ethyl ester	101-97-3	CCOC(=O)Cc1ccccc1	1
1899	4-Phenyl-1,3-dioxane	772-00-9	C1CC(OCO1)c2ccccc2	1
1900	4-Propylbenzoic acid	2438-05-3	CCCc1ccc(cc1)C(=O)O	1
1901	4-(4-Pyridyl)Morpholine	2767-91-1	C1CN(CCO1)c2ccncc2	1
1902	Cis-JasMone	488-10-8	CCC=CCC1=C(C)CCC1=O	1
1903	2,3,5,6-TetraMethyl-1,4-phenylenediaMine	3102-87-2	Cc1c(C)c(N)c(C)c(C)c1N	1
1904	Sebaconitrile	1871-96-1	N#CCCCCCCCCC#N	1
1905	Trimethoxypropylsilane	1067-25-0	CCC[Si](OC)(OC)OC	1
1906	8-Chloro-1-octanol	23144-52-7	OCCCCCCCCCl	1
1907	2-Bromo-4-butanolide	5061-21-2	BrC1CCOC1=O	1
1908	Tetrahydrofurfuryl bromide	1192-30-9	BrCC1CCCO1	1
1909	1-Bromohexane	111-25-1	CCCCCCBr	1
1910	2,3,5,6-Tetrafluoroaniline	700-17-4	Nc1c(F)c(F)cc(F)c1F	1
1911	2,3,4,5-Tetrafluoroaniline	5580-80-3	Nc1cc(F)c(F)c(F)c1F	1
1912	PhthalaMic Acid	88-97-1	NC(=O)c1ccccc1C(=O)O	1
1913	Ethyl 3-aminobenzoate	582-33-2	CCOC(=O)c1cccc(N)c1	1
1914	3-(Dimethylamino)benzoic acid	99-64-9	CN(C)c1cccc(c1)C(=O)O	1
1915	4-Dimethylaminobenzoic acid	619-84-1	CN(C)c1ccc(cc1)C(=O)O	1
1916	Ethyl Anthranilate	87-25-2	CCOC(=O)c1ccccc1N	1
1917	Methyl 2-(methylamino)benzoate	85-91-6	CNc1ccccc1C(=O)OC	1
1918	Methyl 3-amino-4-methylbenzoate	18595-18-1	COC(=O)c1ccc(C)c(N)c1	1
1919	Ethyl 2-pyridylacetate	2739-98-2	CCOC(=O)Cc1ccccn1	1
1920	N-(2-Methoxyphenyl)acetamide	93-26-5	COc1ccccc1NC(=O)C	1
1921	2-Amino-4-tert-butylphenol	1199-46-8	CC(C)(C)c1ccc(O)c(N)c1	1
1922	4-Butoxyaniline	4344-55-2	CCCCOc1ccc(N)cc1	1
1923	3-Diethylaminophenol	91-68-9	CCN(CC)c1cccc(O)c1	1
1924	N-Ethyl-N-hydroxyethylaniline	92-50-2	CCN(CCO)c1ccccc1	1
1925	Hordenine	539-15-1	CN(C)CCc1ccc(O)cc1	1
1926	Tetrachloroethylene	127-18-4	ClC(=C(Cl)Cl)Cl	1
1927	Hexafluoroacetone trihydrate	34202-69-2	FC(F)(F)C(=O)C(F)(F)F	1
1928	2,3,5,6-Tetrafluorophenol	769-39-1	Oc1c(F)c(F)cc(F)c1F	1
1929	Pathalic acid	88-99-3	OC(=O)c1ccccc1C(=O)O	1
1930	Piperonylic acid	94-53-1	OC(=O)c1ccc2OCOc2c1	1
1931	5-Formylsalicylic acid	616-76-2	OC(=O)c1cc(C=O)ccc1O	1
1932	2-NitrobenzaldoxiMe	6635-41-2	ON=Cc1ccccc1[N+](=O)[O-]	1
1933	4-Fluorocinnamic acid	459-32-5	OC(=O)C=Cc1ccc(F)cc1	1
1934	2-Fluorocinnamic acid	451-69-4	OC(=O)C=Cc1ccccc1F	1
1935	Diisopropyl phosphite	1809-20-7	CC(C)OP(=O)OC(C)C	1
1936	Ethylparaben	120-47-8	CCOC(=O)c1ccc(O)cc1	1
1937	2,4-Dimethoxybenzaldehyde	613-45-6	COc1ccc(C=O)c(OC)c1	1
1938	Acetovanillone	498-02-2	COc1cc(ccc1O)C(=O)C	1
1939	Ethyl 3-hydroxybenzoate	7781-98-8	CCOC(=O)c1cccc(O)c1	1
1940	3-(4-Hydroxyphenyl)propionic acid	501-97-3	OC(=O)CCc1ccc(O)cc1	1
1941	Methyl 4-hydroxyphenylacetate	14199-15-6	COC(=O)Cc1ccc(O)cc1	1
1942	4-Ethoxybenzoic acid	619-86-3	CCOc1ccc(cc1)C(=O)O	1
1943	Methyl 4-methylsalicylate	4670-56-8	COC(=O)c1ccc(C)cc1O	1
1944	Methyl 5-methylsalicylate	22717-57-3	COC(=O)c1cc(C)ccc1O	1
1945	3-Methoxyphenylacetic acid	1798-09-0	COc1cccc(CC(=O)O)c1	1
1946	3,5-Dimethoxybenzaldehyde	7311-34-4	COc1cc(OC)cc(C=O)c1	1
1947	1-(2-hydroxy-4-methoxyphenyl)-ethanon	552-41-0	COc1ccc(C(=O)C)c(O)c1	1
1948	Ethyl 2-hydroxybenzoate	118-61-6	CCOC(=O)c1ccccc1O	1
1949	Ethyl vanillin	121-32-4	CCOc1cc(C=O)ccc1O	1
1950	Veratraldehyde	120-14-9	COc1ccc(C=O)cc1OC	1
1951	3-Methyltetrahydrophthalic anhydride	5333-84-6	CC1C=CCC2C1C(=O)OC2=O	1
1952	2-Ethoxybenzoic acid	134-11-2	CCOc1ccccc1C(=O)O	1
1953	2,5-Dimethoxybenzaldehyde	93-02-7	COc1ccc(OC)c(C=O)c1	1
1954	3-Ethoxysalicylaldehyde	492-88-6	CCOc1cccc(C=O)c1O	1
1955	Methyl 2-methoxybenzoate	606-45-1	COC(=O)c1ccccc1OC	1
1956	DL-Tropic Acid	552-63-6	OCC(C(=O)O)c1ccccc1	1
1957	2',4'-Dihydroxypropiophenone	5792-36-9	CCC(=O)c1ccc(O)cc1O	1
1958	N,N-DiMethyl-3-nitroaniline	619-31-8	CN(C)c1cccc(c1)[N+](=O)[O-]	1
1959	4-Methoxyphenylurea	1566-42-3	COc1ccc(NC(=O)N)cc1	1
1960	Cyromazine	66215-27-8	Nc1nc(N)nc(NC2CC2)n1	1
1961	4-Butoxyphenol	122-94-1	CCCCOc1ccc(O)cc1	1
1962	4-tert-Butylcatechol	98-29-3	CC(C)(C)c1ccc(O)c(O)c1	1
1963	4-Butylresorcinol	18979-61-8	CCCCc1ccc(O)cc1O	1
1964	2-Methoxy-3-isobutyl pyrazine	24683-00-9	COc1nccnc1CC(C)C	1
1965	PhenoxytriMethyl silane	1529-17-5	C[Si](C)(C)Oc1ccccc1	1
1966	4-Nitrophenylboronic acid	24067-17-2	OB(O)c1ccc(cc1)[N+](=O)[O-]	1
1967	2-Nitrophenylboronic acid	5570-19-4	OB(O)c1ccccc1[N+](=O)[O-]	1
1968	3-Nitrophenylboronic acid	13331-27-6	OB(O)c1cccc(c1)[N+](=O)[O-]	1
1969	2-Bromoethyl acetate	927-68-4	CC(=O)OCCBr	1
1970	Methyl 3-bromopropionate	3395-91-3	COC(=O)CCBr	1
1971	p-Nitrobenzoic acid	62-23-7	OC(=O)c1ccc(cc1)[N+](=O)[O-]	1
1972	5-Hydroxy-2-nitrobenzaldehyde	42454-06-8	Oc1ccc(c(C=O)c1)[N+](=O)[O-]	1
1973	2,4-Pyridinedicarboxylic acid	499-80-9	OC(=O)c1ccnc(c1)C(=O)O	1
1974	3,5-Pyridinedicarboxylic acid	499-81-0	OC(=O)c1cncc(c1)C(=O)O	1
1975	2,6-Pyridinedicarboxylic acid	499-83-2	OC(=O)c1cccc(n1)C(=O)O	1
1976	3-Nitrobenzoic acid	121-92-6	OC(=O)c1cccc(c1)[N+](=O)[O-]	1
1977	2-Nitrobenzoic acid	552-16-9	OC(=O)c1ccccc1[N+](=O)[O-]	1
1978	3-Hydroxy-4-nitrobenzaldehyde	704-13-2	Oc1cc(C=O)ccc1[N+](=O)[O-]	1
1979	4-Hydroxy-3-nitrobenzaldehyde	3011-34-5	Oc1ccc(C=O)cc1[N+](=O)[O-]	1
1980	2,5-Pyridinedicarboxylic Acid	100-26-5	OC(=O)c1ccc(nc1)C(=O)O	1
1981	Quinolinic acid	89-00-9	OC(=O)c1cccnc1C(=O)O	1
1982	3,4-Pyridinedicarboxylic acid	490-11-9	OC(=O)c1ccncc1C(=O)O	1
1983	5-Nitrosalicylaldehyde	97-51-8	Oc1ccc(cc1C=O)[N+](=O)[O-]	1
1984	D(-)-4-Hydroxyphenylglycine	22818-40-2	NC(C(=O)O)c1ccc(O)cc1	1
1985	2,4-DiMethyl-6-nitrophenol	14452-34-7	Cc1cc(C)c(O)c(c1)[N+](=O)[O-]	1
1986	N-(4-Hydroxyphenyl)glycine	122-87-2	OC(=O)CNc1ccc(O)cc1	1
1987	5-[(2-Hydroxyethyl)amino]-o-cresol	55302-96-0	Cc1ccc(NCCO)cc1O	1
1988	Ethyl 3,5-dimethyl-1H-pyrrole-2-carboxylate	2199-44-2	CCOC(=O)c1[nH]c(C)cc1C	1
1989	Carbazole	86-74-8	c1ccc2c(c1)[nH]c3ccccc23	1
1990	1-Naphthyl acetonitrile	132-75-2	N#CCc1cccc2ccccc12	1
1991		6305-56-2	OCCN(CCC#N)CCC#N	1
1992	4-Acetamidothiophenol	1126-81-4	CC(=O)Nc1ccc(S)cc1	1
1993	Undecanenitrile	2244-07-7	CCCCCCCCCCC#N	1
1994	3-Chloro-4-methylphenyl isocyanate	28479-22-3	Cc1ccc(cc1Cl)N=C=O	1
1995	1,1,1,2-Tetrachloroethane	630-20-6	ClCC(Cl)(Cl)Cl	1
1996	1,1,2,2-Tetrachloroethane	79-34-5	ClC(Cl)C(Cl)Cl	1
1997	1,2-Dinitrobenzene	528-29-0	[O-][N+](=O)c1ccccc1[N+](=O)[O-]	1
1998	Ethyl 4,4,4-trifluorocrotonate	25597-16-4	CCOC(=O)C=CC(F)(F)F	1
[truncated: 3,222 more rows]

## Sheet: Table S3
Table S3. Performance of 54 binary classification models for the five-fold cross validation using different fingerprints and modeling methodsa for EC
Models	CA	AUC	SE	SP
AP2D-ANN	0.9174	0.9702	0.9001	0.9277
AP2D-C4.5 DT	0.9005	0.8992	0.8813	0.912
AP2D-KNN	0.9152	0.9656	0.9276	0.9077
AP2D-NB	0.8771	0.9341	0.8973	0.865
AP2D-RF	0.9065	0.9673	0.9016	0.9094
AP2D-SVM	0.9228	0.968	0.9045	0.9338
Est-ANN	0.9413	0.9823	0.9392	0.9425
Est-C4.5 DT	0.9043	0.9042	0.8944	0.9103
Est-KNN	0.9157	0.9791	0.9407	0.9007
Est-NB	0.9168	0.9589	0.9465	0.899
Est-RF	0.9217	0.9751	0.9276	0.9181
Est-SVM	0.9255	0.9736	0.9233	0.9268
Ext-ANN	0.9348	0.9815	0.9291	0.9382
Ext-C4.5 DT	0.9027	0.8951	0.8654	0.9251
Ext-KNN	0.87	0.9601	0.9855	0.8005
Ext-NB	0.9152	0.9476	0.9624	0.8868
Ext-RF	0.9391	0.9837	0.9494	0.9329
Ext-SVM	0.938	0.9845	0.8871	0.9686
FP-ANN	0.9473	0.9821	0.9479	0.9469
FP-C4.5 DT	0.9114	0.9068	0.89	0.9242
FP-KNN	0.8646	0.9584	0.9899	0.7892
FP-NB	0.907	0.9425	0.9508	0.8807
FP-RF	0.9331	0.9823	0.9305	0.9347
FP-SVM	0.9478	0.9864	0.9537	0.9443
Graph-ANN	0.9386	0.9783	0.9291	0.9443
Graph-C4.5 DT	0.9119	0.9108	0.8973	0.9207
Graph-KNN	0.9152	0.9678	0.9566	0.8902
Graph-NB	0.8537	0.9034	0.8784	0.8389
Graph-RF	0.9331	0.979	0.9334	0.9329
Graph-SVM	0.9364	0.9818	0.9001	0.9582
KR-ANN	0.9157	0.9688	0.9161	0.9155
KR-C4.5 DT	0.907	0.9037	0.8958	0.9138
KR-KNN	0.8189	0.9356	0.9841	0.7195
KR-NB	0.8798	0.8807	0.8061	0.9242
KR-RF	0.9065	0.9655	0.9479	0.8815
KR-SVM	0.9413	0.9815	0.9334	0.946
MACCS-ANN	0.956	0.9867	0.9609	0.953
MACCS-C4.5 DT	0.9282	0.924	0.903	0.9434
MACCS-KNN	0.9315	0.9826	0.9783	0.9033
MACCS-NB	0.9075	0.9578	0.9363	0.8902
MACCS-RF	0.9451	0.986	0.9609	0.9355
MACCS-SVM	0.9483	0.9873	0.945	0.9504
Pub-ANN	0.9462	0.9859	0.9421	0.9486
Pub-C4.5 DT	0.9179	0.9135	0.8958	0.9312
Pub-KNN	0.9255	0.9803	0.9754	0.8955
Pub-NB	0.8967	0.9193	0.8567	0.9207
Pub-RF	0.9402	0.9857	0.958	0.9294
Pub-SVM	0.9592	0.9916	0.9551	0.9617
Sub-ANN	0.9337	0.9734	0.932	0.9347
Sub-C4.5 DT	0.9114	0.9132	0.9074	0.9138
Sub-KNN	0.9065	0.9697	0.9667	0.8702
Sub-NB	0.8912	0.942	0.8886	0.8929
Sub-RF	0.9135	0.9686	0.9219	0.9085
Sub-SVM	0.9266	0.9715	0.919	0.9312
a ANN: artificial neural network, SVM: support vector machine, kNN: knearest neighbors, C4.5 DT: C4.5 decision tree, NB: naïve bayes, RF random forest. AP2D: atom pair 2D fingerprint, Est: estate fingerprint, Ext: CDK extended fingerprint, FP: CDK fingerprint, Graph: CDK graph only fingerprint, KR: Klekota–Roth fingerprint, MACCS: MACCS fingerprint, Pub: pubChem fingerprint, Sub: substructure fin…

## Sheet: Table S4
Table S4. Performance of 54 binary classification models for the five-fold cross validation using different fingerprints and modeling methodsa for EI
Models	CA	AUC	SE	SP
AP2D-ANN	0.9061	0.9367	0.9495	0.7802
AP2D-C4.5 DT	0.8865	0.8573	0.9292	0.7624
AP2D-KNN	0.91	0.9434	0.9604	0.7633
AP2D-NB	0.8834	0.9135	0.9253	0.7615
AP2D-RF	0.8954	0.9445	0.9669	0.6876
AP2D-SVM	0.9102	0.9415	0.9582	0.7708
Est-ANN	0.9212	0.9573	0.9556	0.8213
Est-C4.5 DT	0.9083	0.8849	0.9472	0.7951
Est-KNN	0.9131	0.9497	0.982	0.7128
Est-NB	0.9064	0.9403	0.9437	0.7979
Est-RF	0.909	0.9588	0.9804	0.7016
Est-SVM	0.926	0.9568	0.963	0.8185
Ext-ANN	0.921	0.9584	0.953	0.8279
Ext-C4.5 DT	0.8942	0.8625	0.9273	0.7979
Ext-KNN	0.8958	0.9301	0.992	0.6165
Ext-NB	0.9121	0.9249	0.9446	0.8176
Ext-RF	0.933	0.972	0.9784	0.8008
Ext-SVM	0.9071	0.9638	0.9038	0.9167
FP-ANN	0.9179	0.9559	0.9488	0.8279
FP-C4.5 DT	0.8906	0.856	0.9279	0.782
FP-KNN	0.8942	0.9248	0.991	0.6127
FP-NB	0.9104	0.9299	0.943	0.8157
FP-RF	0.9313	0.969	0.9765	0.7998
FP-SVM	0.9394	0.9696	0.9707	0.8485
Graph-ANN	0.915	0.953	0.9498	0.8138
Graph-C4.5 DT	0.8693	0.8384	0.9121	0.7446
Graph-KNN	0.8954	0.9316	0.9694	0.6801
Graph-NB	0.8633	0.8747	0.9083	0.7325
Graph-RF	0.9021	0.9536	0.9701	0.7044
Graph-SVM	0.9088	0.9524	0.9395	0.8195
KR-ANN	0.9061	0.9423	0.9417	0.8026
KR-C4.5 DT	0.8764	0.7787	0.9417	0.6866
KR-KNN	0.8863	0.9257	0.9871	0.5931
KR-NB	0.8673	0.8572	0.9002	0.7718
KR-RF	0.9061	0.9504	0.9669	0.7297
KR-SVM	0.9368	0.9613	0.9678	0.8466
MACCS-ANN	0.9358	0.9685	0.9643	0.8531
MACCS-C4.5 DT	0.9011	0.8683	0.9366	0.7979
MACCS-KNN	0.9217	0.9545	0.9842	0.7399
MACCS-NB	0.8956	0.9377	0.9144	0.841
MACCS-RF	0.9306	0.9713	0.9784	0.7914
MACCS-SVM	0.9437	0.974	0.9752	0.8522
Pub-ANN	0.9421	0.972	0.9678	0.8672
Pub-C4.5 DT	0.9057	0.8737	0.9392	0.8082
Pub-KNN	0.9061	0.9539	0.9855	0.6754
Pub-NB	0.8379	0.8813	0.8404	0.8307
Pub-RF	0.9334	0.9756	0.9817	0.7933
Pub-SVM	0.9461	0.9764	0.9733	0.8672
Sub-ANN	0.9203	0.9452	0.9566	0.8148
Sub-C4.5 DT	0.8841	0.8373	0.9331	0.7418
Sub-KNN	0.8946	0.9211	0.9865	0.6277
Sub-NB	0.8911	0.9095	0.9353	0.7624
Sub-RF	0.8899	0.9402	0.9726	0.6492
Sub-SVM	0.9272	0.9482	0.9736	0.7923
a ANN: artificial neural network, SVM: support vector machine, kNN: knearest neighbors, C4.5 DT: C4.5 decision tree, NB: naïve bayes, RF random forest. AP2D: atom pair 2D fingerprint, Est: estate fingerprint, Ext: CDK extended fingerprint, FP: CDK fingerprint, Graph: CDK graph only fingerprint, KR: Klekota–Roth fingerprint, MACCS: MACCS fingerprint, Pub: pubChem fingerprint, Sub: substructure fin…
